# Supplementary material
Source: publisher figshare collection journal article supplement (https://acs.figshare.com/ndownloader/files/4607491)
Supplement: Supplementary file 1 [file 4607491]

  
data_compound_1_fenocl 
  
_audit_creation_method        'enCIFer editing of SHELXL97 CIF output'
_chemical_name_systematic 
; 
 ? 
; 
_chemical_name_common             ? 
_chemical_melting_point           ? 
_chemical_formula_moiety         'C10 H8 Cl3 Fe N2 O2'
_chemical_formula_sum            'C10 H8 Cl3 Fe N2 O2' 
_chemical_formula_weight          350.38 
  
loop_ 
 _atom_type_symbol 
 _atom_type_description 
 _atom_type_scat_dispersion_real 
 _atom_type_scat_dispersion_imag 
 _atom_type_scat_source 
 'C'  'C'   0.0033   0.0016 
 'International Tables Vol C Tables 4.2.6.8 and 6.1.1.4' 
 'H'  'H'   0.0000   0.0000 
 'International Tables Vol C Tables 4.2.6.8 and 6.1.1.4' 
 'N'  'N'   0.0061   0.0033 
 'International Tables Vol C Tables 4.2.6.8 and 6.1.1.4' 
 'O'  'O'   0.0106   0.0060 
 'International Tables Vol C Tables 4.2.6.8 and 6.1.1.4' 
 'Cl'  'Cl'   0.1484   0.1585 
 'International Tables Vol C Tables 4.2.6.8 and 6.1.1.4' 
 'Fe'  'Fe'   0.3463   0.8444 
 'International Tables Vol C Tables 4.2.6.8 and 6.1.1.4' 
  
_symmetry_cell_setting            Monoclinic 
_symmetry_space_group_name_H-M   'P 21/n'
  
loop_ 
 _symmetry_equiv_pos_as_xyz 
 'x, y, z' 
 '-x+1/2, y+1/2, -z+1/2' 
 '-x, -y, -z' 
 'x-1/2, -y-1/2, z-1/2' 
  
_cell_length_a                    12.3596(12) 
_cell_length_b                    9.1961(9) 
_cell_length_c                    12.5172(12) 
_cell_angle_alpha                 90.00 
_cell_angle_beta                  115.162(1) 
_cell_angle_gamma                 90.00 
_cell_volume                      1287.7(4) 
_cell_formula_units_Z             4 
_cell_measurement_temperature     150(2) 
_cell_measurement_reflns_used     5617 
_cell_measurement_theta_min       2.85 
_cell_measurement_theta_max       27.5 
  
_exptl_crystal_description        column 
_exptl_crystal_colour             orange 
_exptl_crystal_size_max           0.28 
_exptl_crystal_size_mid           0.18 
_exptl_crystal_size_min           0.12 
_exptl_crystal_density_meas       ? 
_exptl_crystal_density_diffrn     1.807 
_exptl_crystal_density_method     'not measured' 
_exptl_crystal_F_000              700 
_exptl_absorpt_coefficient_mu     1.786 
_exptl_absorpt_correction_type    multi-scan 
_exptl_absorpt_correction_T_min   0.840
_exptl_absorpt_correction_T_max   1.000 
_exptl_absorpt_process_details   '(SADABS version 2.10; Bruker, 2003)'
  
_exptl_special_details 
; 
 ? 
; 
  
_diffrn_ambient_temperature       150(2) 
_diffrn_radiation_wavelength      0.71073 
_diffrn_radiation_type            MoK\a 
_diffrn_radiation_source          'normal-focus sealed tube' 
_diffrn_radiation_monochromator   graphite 
_diffrn_measurement_device_type   'Bruker SMART APEX CCD area detector' 
_diffrn_measurement_method       \w
_diffrn_detector_area_resol_mean  ? 
_diffrn_standards_number          0 
_diffrn_standards_interval_count  . 
_diffrn_standards_interval_time   ? 
_diffrn_standards_decay_%         0 
_diffrn_reflns_number             14310 
_diffrn_reflns_av_R_equivalents   0.023 
_diffrn_reflns_av_sigmaI/netI     0.019 
_diffrn_reflns_limit_h_min       -16 
_diffrn_reflns_limit_h_max        16 
_diffrn_reflns_limit_k_min       -11
_diffrn_reflns_limit_k_max        11 
_diffrn_reflns_limit_l_min       -16
_diffrn_reflns_limit_l_max        16 
_diffrn_reflns_theta_min          2.85 
_diffrn_reflns_theta_max          27.50 
_reflns_number_total              2946 
_reflns_number_gt                 2659 
_reflns_threshold_expression      >2\s(I) 
  
_computing_data_collection        'Bruker SMART version 5.625 (Bruker, 2001)' 
_computing_cell_refinement        'Bruker SAINT version 6.36A (Bruker, 2000)' 
_computing_data_reduction         'Bruker SAINT; SHELXTL (Sheldrick, 2008)' 
_computing_structure_solution     'SHELXS97 (Sheldrick, 2008)' 
_computing_structure_refinement   'SHELXL97 (Sheldrick, 2008)' 
_computing_molecular_graphics     'Bruker SHELXTL' 
_computing_publication_material  
  'enCIFer (Allen et al., 2004); PLATON (Spek, 2003)' 
  
_refine_special_details 
; 
  
; 
  
_refine_ls_structure_factor_coef  Fsqd 
_refine_ls_matrix_type            full 
_refine_ls_weighting_scheme       calc 
_refine_ls_weighting_details 
 'calc w=1/[\s^2^(Fo^2^)+(0.037P)^2^+0.884P] where P=(Fo^2^+2Fc^2^)/3' 
_atom_sites_solution_primary      direct 
_atom_sites_solution_secondary    difmap 
_atom_sites_solution_hydrogens    geom 
_refine_ls_hydrogen_treatment     constr 
_refine_ls_extinction_method      none 
_refine_ls_extinction_coef        ? 
_refine_ls_number_reflns          2946 
_refine_ls_number_parameters      163 
_refine_ls_number_restraints      0 
_refine_ls_R_factor_all           0.0303 
_refine_ls_R_factor_gt            0.0260 
_refine_ls_wR_factor_ref          0.0689 
_refine_ls_wR_factor_gt           0.0666 
_refine_ls_goodness_of_fit_ref    1.04 
_refine_ls_restrained_S_all       1.04 
_refine_ls_shift/su_max           0.001 
_refine_ls_shift/su_mean          0.000 
  
loop_ 
 _atom_site_label 
 _atom_site_type_symbol 
 _atom_site_fract_x 
 _atom_site_fract_y 
 _atom_site_fract_z 
 _atom_site_U_iso_or_equiv 
 _atom_site_adp_type 
 _atom_site_occupancy 
 _atom_site_symmetry_multiplicity 
 _atom_site_calc_flag 
 _atom_site_refinement_flags 
 _atom_site_disorder_assembly 
 _atom_site_disorder_group 
Fe1 Fe -0.14080(2) 0.78714(3) 0.08420(2) 0.01614(8) Uani 1 1 d . . . 
Cl1 Cl -0.11016(4) 0.78258(5) -0.08057(4) 0.02128(11) Uani 1 1 d . . . 
Cl2 Cl -0.20719(4) 0.61493(5) 0.17008(4) 0.02466(12) Uani 1 1 d . . . 
Cl3 Cl -0.09972(4) 1.00006(5) 0.17950(4) 0.02402(11) Uani 1 1 d . . . 
N1 N 0.59643(13) 0.81337(18) 0.00673(14) 0.0189(3) Uani 1 1 d . . . 
N2 N 0.11385(13) 0.71687(17) 0.15001(14) 0.0187(3) Uani 1 1 d . . . 
O1 O 0.68652(11) 0.83228(16) -0.02497(12) 0.0219(3) Uani 1 1 d . . . 
O2 O 0.02114(11) 0.69514(15) 0.17773(12) 0.0215(3) Uani 1 1 d . . . 
C1 C 0.50885(17) 0.7207(2) -0.05746(17) 0.0218(4) Uani 1 1 d . . . 
H1A H 0.5123 0.6702 -0.1222 0.026 Uiso 1 1 calc R . . 
C2 C 0.41368(17) 0.6990(2) -0.02886(18) 0.0225(4) Uani 1 1 d . . . 
H2A H 0.3521 0.6327 -0.0735 0.027 Uiso 1 1 calc R . . 
C3 C 0.40761(16) 0.7741(2) 0.06511(17) 0.0197(4) Uani 1 1 d . . . 
C4 C 0.50017(16) 0.8692(2) 0.12907(17) 0.0214(4) Uani 1 1 d . . . 
H4A H 0.4985 0.9219 0.1937 0.026 Uiso 1 1 calc R . . 
C5 C 0.59430(16) 0.8870(2) 0.09863(17) 0.0215(4) Uani 1 1 d . . . 
H5A H 0.6578 0.9514 0.1427 0.026 Uiso 1 1 calc R . . 
C6 C 0.15705(16) 0.6012(2) 0.11512(18) 0.0224(4) Uani 1 1 d . . . 
H6A H 0.1216 0.5083 0.1097 0.027 Uiso 1 1 calc R . . 
C7 C 0.25273(17) 0.6175(2) 0.08724(18) 0.0234(4) Uani 1 1 d . . . 
H7A H 0.2831 0.5358 0.0623 0.028 Uiso 1 1 calc R . . 
C8 C 0.30519(16) 0.7537(2) 0.09562(16) 0.0190(4) Uani 1 1 d . . . 
C9 C 0.25746(16) 0.8705(2) 0.13154(16) 0.0202(4) Uani 1 1 d . . . 
H9A H 0.2914 0.9646 0.1378 0.024 Uiso 1 1 calc R . . 
C10 C 0.16109(16) 0.8505(2) 0.15817(17) 0.0200(4) Uani 1 1 d . . . 
H10A H 0.1282 0.9306 0.1822 0.024 Uiso 1 1 calc R . . 
  
loop_ 
 _atom_site_aniso_label 
 _atom_site_aniso_U_11 
 _atom_site_aniso_U_22 
 _atom_site_aniso_U_33 
 _atom_site_aniso_U_23 
 _atom_site_aniso_U_13 
 _atom_site_aniso_U_12 
Fe1 0.01291(13) 0.01886(15) 0.01751(14) 0.00070(10) 0.00728(10) -0.00068(9) 
Cl1 0.0210(2) 0.0255(2) 0.0199(2) 0.00068(17) 0.01117(18) 0.00100(17) 
Cl2 0.0188(2) 0.0269(2) 0.0290(2) 0.00860(19) 0.01087(18) -0.00132(17) 
Cl3 0.0219(2) 0.0221(2) 0.0283(2) -0.00443(18) 0.01095(19) -0.00150(17) 
N1 0.0122(7) 0.0249(8) 0.0196(8) 0.0024(6) 0.0068(6) 0.0007(6) 
N2 0.0125(7) 0.0234(8) 0.0201(8) 0.0042(6) 0.0068(6) 0.0011(6) 
O1 0.0124(6) 0.0336(8) 0.0216(7) 0.0043(6) 0.0090(5) -0.0004(5) 
O2 0.0133(6) 0.0287(7) 0.0254(7) 0.0062(6) 0.0111(5) 0.0010(5) 
C1 0.0176(9) 0.0274(10) 0.0200(9) -0.0044(8) 0.0075(7) -0.0020(7) 
C2 0.0151(8) 0.0282(10) 0.0233(9) -0.0034(8) 0.0072(7) -0.0046(7) 
C3 0.0148(8) 0.0235(10) 0.0216(9) 0.0030(7) 0.0084(7) 0.0014(7) 
C4 0.0173(9) 0.0258(10) 0.0217(9) -0.0033(8) 0.0090(7) -0.0004(7) 
C5 0.0143(8) 0.0255(10) 0.0234(9) -0.0016(8) 0.0067(7) -0.0014(7) 
C6 0.0187(9) 0.0200(9) 0.0295(10) 0.0000(8) 0.0111(8) -0.0006(7) 
C7 0.0193(9) 0.0233(10) 0.0296(10) -0.0015(8) 0.0122(8) 0.0012(7) 
C8 0.0134(8) 0.0253(9) 0.0181(8) 0.0009(7) 0.0064(7) -0.0005(7) 
C9 0.0169(9) 0.0203(9) 0.0233(9) 0.0025(7) 0.0084(7) -0.0005(7) 
C10 0.0148(8) 0.0209(9) 0.0241(9) 0.0024(7) 0.0080(7) 0.0024(7) 
  
_geom_special_details 
; 
 All esds (except the esd in the dihedral angle between two l.s. planes) 
 are estimated using the full covariance matrix.  The cell esds are taken 
 into account individually in the estimation of esds in distances, angles 
 and torsion angles; correlations between esds in cell parameters are only 
 used when they are defined by crystal symmetry.  An approximate (isotropic) 
 treatment of cell esds is used for estimating esds involving l.s. planes. 
; 
  
loop_ 
 _geom_bond_atom_site_label_1 
 _geom_bond_atom_site_label_2 
 _geom_bond_distance 
 _geom_bond_site_symmetry_2 
 _geom_bond_publ_flag 
Fe1 O1 2.0285(13) 1_455 ? 
Fe1 O2 2.0248(13) . ? 
Fe1 Cl1 2.2502(5) . ? 
Fe1 Cl2 2.2554(5) . ? 
Fe1 Cl3 2.2360(6) . ? 
N1 O1 1.3428(18) . ? 
N1 C1 1.343(2) . ? 
N1 C5 1.345(2) . ? 
N2 C6 1.344(2) . ? 
N2 C10 1.345(2) . ? 
N2 O2 1.3459(18) . ? 
C1 C2 1.382(3) . ? 
C2 C3 1.393(3) . ? 
C3 C4 1.391(3) . ? 
C3 C8 1.481(2) . ? 
C4 C5 1.379(3) . ? 
C6 C7 1.376(3) . ? 
C7 C8 1.394(3) . ? 
C8 C9 1.389(3) . ? 
C9 C10 1.379(2) . ? 
  
loop_ 
 _geom_angle_atom_site_label_1 
 _geom_angle_atom_site_label_2 
 _geom_angle_atom_site_label_3 
 _geom_angle 
 _geom_angle_site_symmetry_1 
 _geom_angle_site_symmetry_3 
 _geom_angle_publ_flag 
O2 Fe1 O1 166.72(6) . 1_455 ? 
O2 Fe1 Cl3 96.49(4) . . ? 
O1 Fe1 Cl3 96.63(4) 1_455 . ? 
O2 Fe1 Cl1 90.69(4) . . ? 
O1 Fe1 Cl1 85.71(4) 1_455 . ? 
Cl3 Fe1 Cl1 114.63(2) . . ? 
O2 Fe1 Cl2 84.35(4) . . ? 
O1 Fe1 Cl2 88.45(4) 1_455 . ? 
Cl3 Fe1 Cl2 114.00(2) . . ? 
Cl1 Fe1 Cl2 131.37(2) . . ? 
O1 N1 C1 117.64(16) . . ? 
O1 N1 C5 120.52(15) . . ? 
C1 N1 C5 121.83(16) . . ? 
C6 N2 C10 121.85(16) . . ? 
C6 N2 O2 117.77(15) . . ? 
C10 N2 O2 120.38(15) . . ? 
N1 O1 Fe1 122.79(11) . 1_655 ? 
N2 O2 Fe1 121.97(11) . . ? 
N1 C1 C2 119.64(18) . . ? 
C1 C2 C3 120.31(18) . . ? 
C4 C3 C2 118.11(17) . . ? 
C4 C3 C8 121.01(17) . . ? 
C2 C3 C8 120.89(17) . . ? 
C5 C4 C3 119.96(18) . . ? 
N1 C5 C4 120.15(17) . . ? 
N2 C6 C7 119.97(18) . . ? 
C6 C7 C8 120.08(18) . . ? 
C9 C8 C7 118.12(16) . . ? 
C9 C8 C3 120.82(17) . . ? 
C7 C8 C3 121.05(17) . . ? 
C10 C9 C8 120.26(18) . . ? 
N2 C10 C9 119.71(17) . . ? 
  
_diffrn_measured_fraction_theta_max    0.998 
_diffrn_reflns_theta_full              27.50 
_diffrn_measured_fraction_theta_full   0.998 
_refine_diff_density_max    0.45 
_refine_diff_density_min   -0.22 
_refine_diff_density_rms    0.07 

#===END of CIF
  
data_compound_2_cutipf 

_refine_special_details 
; 
 The H atoms of the disordered MeOH solvent were not located, but
 these are included in the formula, formula, weight, etc.
; 
  
_audit_creation_method         'enCIFer editing of SHELXL97 CIF output' 
_chemical_name_systematic 
; 
 ? 
; 
_chemical_name_common             ? 
_chemical_melting_point           ? 
_chemical_formula_moiety         'C32 H32 Cu N6 O8, 2(F6 P), 3(C H4 O)' 
_chemical_formula_sum            'C33 H36 Cu F12 N6 O9 P2' 
_chemical_formula_weight          1014.16 
  
loop_ 
 _atom_type_symbol 
 _atom_type_description 
 _atom_type_scat_dispersion_real 
 _atom_type_scat_dispersion_imag 
 _atom_type_scat_source 
 'C'  'C'   0.0033   0.0016 
 'International Tables Vol C Tables 4.2.6.8 and 6.1.1.4' 
 'H'  'H'   0.0000   0.0000 
 'International Tables Vol C Tables 4.2.6.8 and 6.1.1.4' 
 'N'  'N'   0.0061   0.0033 
 'International Tables Vol C Tables 4.2.6.8 and 6.1.1.4' 
 'O'  'O'   0.0106   0.0060 
 'International Tables Vol C Tables 4.2.6.8 and 6.1.1.4' 
 'F'  'F'   0.0171   0.0103 
 'International Tables Vol C Tables 4.2.6.8 and 6.1.1.4' 
 'P'  'P'   0.1023   0.0942 
 'International Tables Vol C Tables 4.2.6.8 and 6.1.1.4' 
 'Cu'  'Cu'   0.3201   1.2651 
 'International Tables Vol C Tables 4.2.6.8 and 6.1.1.4' 
  
_symmetry_cell_setting            Monoclinic 
_symmetry_space_group_name_H-M   'P 2/c' 
  
loop_ 
 _symmetry_equiv_pos_as_xyz 
 'x, y, z' 
 '-x, y, -z+1/2' 
 '-x, -y, -z' 
 'x, -y, z-1/2' 
  
_cell_length_a                    7.0131(11) 
_cell_length_b                    10.059(2) 
_cell_length_c                    28.818(5) 
_cell_angle_alpha                 90.00 
_cell_angle_beta                  90.711(3) 
_cell_angle_gamma                 90.00 
_cell_volume                      2032.8(10) 
_cell_formula_units_Z             2 
_cell_measurement_temperature     150(2) 
_cell_measurement_reflns_used     2749 
_cell_measurement_theta_min       2.5 
_cell_measurement_theta_max       25.15 
  
_exptl_crystal_description        PLATE 
_exptl_crystal_colour             RED 
_exptl_crystal_size_max           0.210 
_exptl_crystal_size_mid           0.116 
_exptl_crystal_size_min           0.076 
_exptl_crystal_density_meas       ? 
_exptl_crystal_density_diffrn     1.657 
_exptl_crystal_density_method     'not measured' 
_exptl_crystal_F_000              1030 
_exptl_absorpt_coefficient_mu     0.731 
_exptl_absorpt_correction_type    multi-scan 
_exptl_absorpt_correction_T_min   0.844 
_exptl_absorpt_correction_T_max   1.000 
_exptl_absorpt_process_details   '(SADABS; Bruker, 2003)'
  
_exptl_special_details 
; 
 ? 
; 
  
_diffrn_ambient_temperature       150(2) 
_diffrn_radiation_wavelength      0.71073 
_diffrn_radiation_type            MoK\a 
_diffrn_radiation_source          'normal-focus sealed tube' 
_diffrn_radiation_monochromator   graphite 
_diffrn_measurement_device_type   'Bruker SMART APEX CCD area detector' 
_diffrn_measurement_method        \w
_diffrn_detector_area_resol_mean  ? 
_diffrn_standards_number          0 
_diffrn_standards_interval_count  . 
_diffrn_standards_interval_time   ? 
_diffrn_standards_decay_%         0 
_diffrn_reflns_number             10536 
_diffrn_reflns_av_R_equivalents   0.035 
_diffrn_reflns_av_sigmaI/netI     0.044 
_diffrn_reflns_limit_h_min       -8 
_diffrn_reflns_limit_h_max        7 
_diffrn_reflns_limit_k_min       -12 
_diffrn_reflns_limit_k_max        11 
_diffrn_reflns_limit_l_min       -34 
_diffrn_reflns_limit_l_max        20 
_diffrn_reflns_theta_min          2.47 
_diffrn_reflns_theta_max          25.15 
_reflns_number_total              3645 
_reflns_number_gt                 2883 
_reflns_threshold_expression      >2\s(I) 
  
_computing_data_collection        'Bruker SMART version 5.625 (Bruker, 2001)' 
_computing_cell_refinement        'Bruker SAINT version 6.36A (Bruker, 2000)' 
_computing_data_reduction         'Bruker SAINT; SHELXTL (Sheldrick, 2008)' 
_computing_structure_solution     'SHELXS97 (Sheldrick, 2008)' 
_computing_structure_refinement   'SHELXL97 (Sheldrick, 2008)' 
_computing_molecular_graphics     ? 
_computing_publication_material 'enCIFer(Allen et al.,2004);PLATON(Spek,2003)' 
  
_refine_ls_structure_factor_coef  Fsqd 
_refine_ls_matrix_type            full 
_refine_ls_weighting_scheme       calc 
_refine_ls_weighting_details 
 'calc w=1/[\s^2^(Fo^2^)+(0.067P)^2^+7.175P] where P=(Fo^2^+2Fc^2^)/3' 
_atom_sites_solution_primary      direct 
_atom_sites_solution_secondary    difmap 
_atom_sites_solution_hydrogens    geom 
_refine_ls_hydrogen_treatment     mixed
_refine_ls_extinction_method      none 
_refine_ls_extinction_coef        ? 
_refine_ls_number_reflns          3645 
_refine_ls_number_parameters      295 
_refine_ls_number_restraints      0 
_refine_ls_R_factor_all           0.0766 
_refine_ls_R_factor_gt            0.0595 
_refine_ls_wR_factor_ref          0.166 
_refine_ls_wR_factor_gt           0.158 
_refine_ls_goodness_of_fit_ref    1.08 
_refine_ls_restrained_S_all       1.08
_refine_ls_shift/su_max           0.002 
_refine_ls_shift/su_mean          0.000 
  
loop_ 
 _atom_site_label 
 _atom_site_type_symbol 
 _atom_site_fract_x 
 _atom_site_fract_y 
 _atom_site_fract_z 
 _atom_site_U_iso_or_equiv 
 _atom_site_adp_type 
 _atom_site_occupancy 
 _atom_site_symmetry_multiplicity 
 _atom_site_calc_flag 
 _atom_site_refinement_flags 
 _atom_site_disorder_assembly 
 _atom_site_disorder_group 
Cu1 Cu 0.0000 0.0000 0.5000 0.0196(2) Uani 1 2 d S . . 
O1 O 0.2298(4) 0.0384(3) 0.46247(10) 0.0240(7) Uani 1 1 d . . . 
O2 O 0.2948(6) -0.0416(4) 0.12729(12) 0.0405(9) Uani 1 1 d . . . 
O3 O -0.0246(4) -0.1666(3) 0.46496(11) 0.0286(8) Uani 1 1 d . . . 
O4 O -0.1754(5) 0.1143(4) 0.44303(12) 0.0303(8) Uani 1 1 d . . . 
C4A C -0.3353(7) 0.1912(6) 0.4560(2) 0.0391(13) Uani 1 1 d . . . 
H4AA H -0.3928 0.2322 0.4284 0.059 Uiso 1 1 calc R . . 
H4AB H -0.2945 0.2608 0.4778 0.059 Uiso 1 1 calc R . . 
H4AC H -0.4293 0.1337 0.4710 0.059 Uiso 1 1 calc R . . 
H4 H -0.209(9) 0.074(7) 0.415(2) 0.06(2) Uiso 1 1 d . . . 
C1 C 0.2380(7) -0.0952(5) 0.39661(17) 0.0282(11) Uani 1 1 d . . . 
H1A H 0.2442 -0.1721 0.4157 0.034 Uiso 1 1 calc R . . 
C2 C 0.2420(7) -0.1083(5) 0.34907(17) 0.0302(11) Uani 1 1 d . . . 
H2A H 0.2489 -0.1946 0.3358 0.036 Uiso 1 1 calc R . . 
C3 C 0.2360(6) 0.0020(5) 0.32000(15) 0.0230(9) Uani 1 1 d . . . 
C4 C 0.2221(8) 0.1256(5) 0.34182(17) 0.0324(12) Uani 1 1 d . . . 
H4A H 0.2163 0.2041 0.3235 0.039 Uiso 1 1 calc R . . 
C5 C 0.2168(8) 0.1353(5) 0.38948(17) 0.0334(12) Uani 1 1 d . . . 
H5A H 0.2069 0.2203 0.4036 0.040 Uiso 1 1 calc R . . 
C6 C 0.2703(7) 0.0911(5) 0.19273(17) 0.0303(11) Uani 1 1 d . . . 
H6A H 0.2763 0.1689 0.1741 0.036 Uiso 1 1 calc R . . 
C7 C 0.2576(7) 0.1027(5) 0.23982(17) 0.0303(11) Uani 1 1 d . . . 
H7A H 0.2571 0.1886 0.2535 0.036 Uiso 1 1 calc R . . 
C8 C 0.2451(6) -0.0099(5) 0.26852(16) 0.0237(9) Uani 1 1 d . . . 
C9 C 0.2439(7) -0.1324(5) 0.24635(17) 0.0280(11) Uani 1 1 d . . . 
H9A H 0.2341 -0.2114 0.2642 0.034 Uiso 1 1 calc R . . 
C10 C 0.2568(7) -0.1412(5) 0.19852(18) 0.0314(11) Uani 1 1 d . . . 
H10A H 0.2532 -0.2257 0.1839 0.038 Uiso 1 1 calc R . . 
C11 C -0.3029(7) -0.2755(5) 0.44513(17) 0.0318(11) Uani 1 1 d . . . 
H11A H -0.3145 -0.2218 0.4181 0.038 Uiso 1 1 calc R . . 
C12 C -0.4383(7) -0.3717(5) 0.45413(17) 0.0311(11) Uani 1 1 d . . . 
H12A H -0.5410 -0.3849 0.4328 0.037 Uiso 1 1 calc R . . 
C13 C -0.4262(6) -0.4498(5) 0.49431(16) 0.0232(10) Uani 1 1 d . . . 
C14 C -0.2665(7) -0.4302(5) 0.52286(17) 0.0269(10) Uani 1 1 d . . . 
H14A H -0.2493 -0.4835 0.5498 0.032 Uiso 1 1 calc R . . 
C15 C -0.1338(6) -0.3346(5) 0.51235(17) 0.0278(11) Uani 1 1 d . . . 
H15A H -0.0258 -0.3226 0.5321 0.033 Uiso 1 1 calc R . . 
N1 N 0.2255(5) 0.0258(4) 0.41613(13) 0.0230(8) Uani 1 1 d . . . 
N2 N 0.2745(6) -0.0296(4) 0.17250(14) 0.0290(9) Uani 1 1 d . . . 
N3 N -0.1552(5) -0.2580(4) 0.47445(13) 0.0239(9) Uani 1 1 d . . . 
P1 P -0.0021(2) -0.49611(15) 0.14785(5) 0.0444(4) Uani 1 1 d . . . 
F1 F -0.2147(5) -0.5549(4) 0.14155(14) 0.0614(10) Uani 1 1 d . . . 
F2 F 0.0449(6) -0.6101(4) 0.18460(14) 0.0694(12) Uani 1 1 d . . . 
F3 F -0.0708(7) -0.4014(4) 0.18877(13) 0.0668(11) Uani 1 1 d . . . 
F4 F 0.0646(6) -0.5896(4) 0.10627(14) 0.0640(11) Uani 1 1 d . . . 
F5 F -0.0554(6) -0.3829(4) 0.11091(13) 0.0627(10) Uani 1 1 d . . . 
F6 F 0.2102(6) -0.4385(4) 0.15239(14) 0.0676(11) Uani 1 1 d . . . 
O1S O 0.5000 -0.5258(19) 0.2500 0.192(7) Uani 1 2 d S . . 
C1S C 0.492(3) -0.6300(12) 0.2208(5) 0.072(5) Uani 0.50 1 d P . . 
  
loop_ 
 _atom_site_aniso_label 
 _atom_site_aniso_U_11 
 _atom_site_aniso_U_22 
 _atom_site_aniso_U_33 
 _atom_site_aniso_U_23 
 _atom_site_aniso_U_13 
 _atom_site_aniso_U_12 
Cu1 0.0254(4) 0.0167(4) 0.0168(4) -0.0021(3) 0.0038(3) -0.0083(3) 
O1 0.0272(16) 0.0276(17) 0.0172(16) -0.0011(13) 0.0041(13) -0.0097(13) 
O2 0.061(2) 0.043(2) 0.0177(18) -0.0023(16) -0.0015(16) 0.0130(18) 
O3 0.0327(18) 0.0259(18) 0.0275(18) -0.0084(14) 0.0114(14) -0.0171(14) 
O4 0.0300(18) 0.033(2) 0.0275(19) -0.0027(16) 0.0011(14) -0.0004(15) 
C4A 0.027(3) 0.038(3) 0.052(4) -0.003(3) 0.003(2) -0.004(2) 
C1 0.036(3) 0.019(2) 0.029(3) 0.000(2) 0.010(2) -0.004(2) 
C2 0.041(3) 0.022(3) 0.027(3) -0.002(2) 0.009(2) -0.005(2) 
C3 0.023(2) 0.025(2) 0.020(2) -0.002(2) 0.0031(17) -0.0035(19) 
C4 0.053(3) 0.021(3) 0.024(3) 0.004(2) 0.003(2) 0.000(2) 
C5 0.051(3) 0.021(3) 0.028(3) -0.003(2) 0.002(2) -0.003(2) 
C6 0.040(3) 0.025(3) 0.026(3) 0.000(2) 0.002(2) 0.004(2) 
C7 0.038(3) 0.024(3) 0.029(3) -0.003(2) 0.003(2) 0.001(2) 
C8 0.024(2) 0.023(2) 0.025(2) 0.000(2) 0.0030(17) -0.0020(19) 
C9 0.036(3) 0.022(2) 0.026(3) 0.000(2) 0.001(2) 0.000(2) 
C10 0.040(3) 0.023(3) 0.031(3) -0.005(2) 0.000(2) 0.003(2) 
C11 0.036(3) 0.036(3) 0.023(3) 0.002(2) -0.001(2) -0.010(2) 
C12 0.029(2) 0.037(3) 0.027(3) 0.001(2) -0.003(2) -0.011(2) 
C13 0.026(2) 0.020(2) 0.023(2) -0.0034(18) 0.0046(18) -0.0042(19) 
C14 0.030(2) 0.020(2) 0.031(3) 0.002(2) 0.000(2) -0.0056(19) 
C15 0.024(2) 0.027(3) 0.033(3) 0.001(2) -0.003(2) -0.0088(19) 
N1 0.0239(18) 0.025(2) 0.0197(19) -0.0008(16) 0.0040(15) -0.0057(15) 
N2 0.032(2) 0.032(2) 0.023(2) -0.0038(17) -0.0026(17) 0.0051(17) 
N3 0.026(2) 0.023(2) 0.023(2) -0.0063(17) 0.0071(16) -0.0079(16) 
P1 0.0712(10) 0.0250(7) 0.0370(8) -0.0054(7) -0.0029(7) 0.0009(7) 
F1 0.067(2) 0.051(2) 0.066(3) -0.001(2) -0.0005(19) -0.0034(19) 
F2 0.107(3) 0.034(2) 0.067(3) 0.0036(18) -0.027(2) 0.003(2) 
F3 0.118(3) 0.038(2) 0.045(2) -0.0093(17) 0.013(2) 0.007(2) 
F4 0.073(3) 0.055(2) 0.064(3) -0.032(2) -0.003(2) 0.0088(19) 
F5 0.101(3) 0.040(2) 0.047(2) 0.0096(17) 0.006(2) 0.007(2) 
F6 0.083(3) 0.055(2) 0.065(3) -0.014(2) -0.006(2) -0.016(2) 
O1S 0.207(16) 0.230(19) 0.138(12) 0.000 -0.027(11) 0.000 
C1S 0.135(14) 0.020(6) 0.061(9) -0.004(6) -0.042(9) -0.015(7) 
  
_geom_special_details 
; 
 All esds (except the esd in the dihedral angle between two l.s. planes) 
 are estimated using the full covariance matrix.  The cell esds are taken 
 into account individually in the estimation of esds in distances, angles 
 and torsion angles; correlations between esds in cell parameters are only 
 used when they are defined by crystal symmetry.  An approximate (isotropic) 
 treatment of cell esds is used for estimating esds involving l.s. planes. 
; 
  
loop_ 
 _geom_bond_atom_site_label_1 
 _geom_bond_atom_site_label_2 
 _geom_bond_distance 
 _geom_bond_site_symmetry_2 
 _geom_bond_publ_flag 
Cu1 O1 1.990(3) . ? 
Cu1 O3 1.963(3) . ? 
Cu1 O4 2.341(3) . ? 
O1 N1 1.341(5) . ? 
O2 N2 1.318(5) . ? 
O3 N3 1.328(5) . ? 
O4 C4A 1.417(6) . ? 
C1 N1 1.345(6) . ? 
C1 C2 1.377(7) . ? 
C2 C3 1.391(7) . ? 
C3 C4 1.397(7) . ? 
C3 C8 1.491(6) . ? 
C4 C5 1.378(7) . ? 
C5 N1 1.343(6) . ? 
C6 N2 1.347(6) . ? 
C6 C7 1.366(7) . ? 
C7 C8 1.406(7) . ? 
C8 C9 1.388(7) . ? 
C9 C10 1.385(7) . ? 
C10 N2 1.356(6) . ? 
C11 N3 1.340(6) . ? 
C11 C12 1.382(7) . ? 
C12 C13 1.401(7) . ? 
C13 C14 1.395(7) . ? 
C14 C15 1.375(6) . ? 
C15 N3 1.344(6) . ? 
P1 F1 1.612(4) . ? 
P1 F2 1.592(4) . ? 
P1 F3 1.595(4) . ? 
P1 F4 1.598(4) . ? 
P1 F5 1.600(4) . ? 
P1 F6 1.601(4) . ? 
O1S C1S 1.345(17) . ? 
  
loop_ 
 _geom_angle_atom_site_label_1 
 _geom_angle_atom_site_label_2 
 _geom_angle_atom_site_label_3 
 _geom_angle 
 _geom_angle_site_symmetry_1 
 _geom_angle_site_symmetry_3 
 _geom_angle_publ_flag 
O1 Cu1 O3 87.29(12) . . ? 
O1 Cu1 O4 86.88(12) . . ? 
O3 Cu1 O4 90.95(14) . . ? 
N1 O1 Cu1 121.0(2) . . ? 
N3 O3 Cu1 122.7(3) . . ? 
C4A O4 Cu1 119.6(3) . . ? 
N1 C1 C2 120.3(4) . . ? 
C1 C2 C3 121.5(4) . . ? 
C2 C3 C4 116.2(4) . . ? 
C2 C3 C8 122.3(4) . . ? 
C4 C3 C8 121.6(4) . . ? 
C5 C4 C3 121.0(4) . . ? 
N1 C5 C4 120.7(4) . . ? 
N2 C6 C7 120.5(5) . . ? 
C6 C7 C8 121.4(5) . . ? 
C9 C8 C7 116.4(4) . . ? 
C9 C8 C3 122.0(4) . . ? 
C7 C8 C3 121.6(4) . . ? 
C10 C9 C8 121.0(5) . . ? 
N2 C10 C9 120.3(4) . . ? 
N3 C11 C12 120.1(5) . . ? 
C11 C12 C13 120.8(4) . . ? 
C14 C13 C12 116.7(4) . . ? 
C14 C13 C13 121.4(5) . 3_446 ? 
C12 C13 C13 121.9(5) . 3_446 ? 
C15 C14 C13 120.6(5) . . ? 
N3 C15 C14 120.8(4) . . ? 
O1 N1 C5 119.5(4) . . ? 
O1 N1 C1 120.1(4) . . ? 
C5 N1 C1 120.4(4) . . ? 
O2 N2 C6 120.9(4) . . ? 
O2 N2 C10 118.8(4) . . ? 
C6 N2 C10 120.3(4) . . ? 
O3 N3 C11 119.4(4) . . ? 
O3 N3 C15 119.6(4) . . ? 
C11 N3 C15 121.0(4) . . ? 
F2 P1 F3 90.0(2) . . ? 
F2 P1 F4 90.9(2) . . ? 
F3 P1 F4 179.1(2) . . ? 
F2 P1 F5 178.4(3) . . ? 
F3 P1 F5 89.8(2) . . ? 
F4 P1 F5 89.3(2) . . ? 
F2 P1 F6 91.2(2) . . ? 
F3 P1 F6 90.7(2) . . ? 
F4 P1 F6 89.6(2) . . ? 
F5 P1 F6 90.4(2) . . ? 
F2 P1 F1 89.7(2) . . ? 
F3 P1 F1 90.9(2) . . ? 
F4 P1 F1 88.8(2) . . ? 
F5 P1 F1 88.7(2) . . ? 
F6 P1 F1 178.2(2) . . ? 

  
_diffrn_measured_fraction_theta_max    0.997 
_diffrn_reflns_theta_full              25.15 
_diffrn_measured_fraction_theta_full   0.997 

_refine_diff_density_max    0.76 
_refine_diff_density_min   -0.49 
_refine_diff_density_rms    0.09

#=== END of CIF

  
data_compound_3_mnbpoc 
  
_audit_creation_method         'enCIFer editing of SHELXL97 CIF output' 
_chemical_name_systematic 
; 
 ? 
; 
_chemical_name_common             ? 
_chemical_melting_point           ? 
_chemical_formula_moiety         'Mn C30 H24 N6 O6, 2(Cl O4)' 
_chemical_formula_sum            'C30 H24 Cl2 Mn N6 O14' 
_chemical_formula_weight          818.39 
  
loop_ 
 _atom_type_symbol 
 _atom_type_description 
 _atom_type_scat_dispersion_real 
 _atom_type_scat_dispersion_imag 
 _atom_type_scat_source 
 'C'  'C'   0.0033   0.0016 
 'International Tables Vol C Tables 4.2.6.8 and 6.1.1.4' 
 'H'  'H'   0.0000   0.0000 
 'International Tables Vol C Tables 4.2.6.8 and 6.1.1.4' 
 'N'  'N'   0.0061   0.0033 
 'International Tables Vol C Tables 4.2.6.8 and 6.1.1.4' 
 'O'  'O'   0.0106   0.0060 
 'International Tables Vol C Tables 4.2.6.8 and 6.1.1.4' 
 'Cl'  'Cl'   0.1484   0.1585 
 'International Tables Vol C Tables 4.2.6.8 and 6.1.1.4' 
 'Mn'  'Mn'   0.3368   0.7283 
 'International Tables Vol C Tables 4.2.6.8 and 6.1.1.4' 
  
_symmetry_cell_setting            Monoclinic 
_symmetry_space_group_name_H-M   'P 21/c'
  
loop_ 
 _symmetry_equiv_pos_as_xyz 
 'x, y, z' 
 '-x, y+1/2, -z+1/2' 
 '-x, -y, -z' 
 'x, -y-1/2, z-1/2' 
  
_cell_length_a                    8.4318(12) 
_cell_length_b                    12.403(2) 
_cell_length_c                    15.087(2) 
_cell_angle_alpha                 90.00 
_cell_angle_beta                  99.970(3) 
_cell_angle_gamma                 90.00 
_cell_volume                      1554.0(6) 
_cell_formula_units_Z             2 
_cell_measurement_temperature     150(2) 
_cell_measurement_reflns_used     2613 
_cell_measurement_theta_min       2.5 
_cell_measurement_theta_max       27.5 
  
_exptl_crystal_description        plate
_exptl_crystal_colour            red
_exptl_crystal_size_max           0.36 
_exptl_crystal_size_mid           0.136 
_exptl_crystal_size_min           0.037 
_exptl_crystal_density_meas       ? 
_exptl_crystal_density_diffrn     1.749 
_exptl_crystal_density_method     'not measured' 
_exptl_crystal_F_000              834 
_exptl_absorpt_coefficient_mu     0.683 
_exptl_absorpt_correction_type    multi-scan 
_exptl_absorpt_correction_T_min   0.807 
_exptl_absorpt_correction_T_max   1.000 
_exptl_absorpt_process_details    'Bruker SADABS v2.03' 
  
_exptl_special_details 
; 
 ? 
; 
  
_diffrn_ambient_temperature       150(2) 
_diffrn_radiation_wavelength      0.71073 
_diffrn_radiation_type            MoK\a 
_diffrn_radiation_source          'sealed tube' 
_diffrn_radiation_monochromator   graphite 
_diffrn_measurement_device_type   'Bruker SMART APEX CCD area detector' 
_diffrn_measurement_method      \w
_diffrn_detector_area_resol_mean  ? 
_diffrn_standards_number          0 
_diffrn_standards_interval_count  . 
_diffrn_standards_interval_time   ? 
_diffrn_standards_decay_%         0 
_diffrn_reflns_number             9029 
_diffrn_reflns_av_R_equivalents   0.0243 
_diffrn_reflns_av_sigmaI/netI     0.0319 
_diffrn_reflns_limit_h_min        -8 
_diffrn_reflns_limit_h_max        10 
_diffrn_reflns_limit_k_min        -16 
_diffrn_reflns_limit_k_max        16 
_diffrn_reflns_limit_l_min        -18 
_diffrn_reflns_limit_l_max        19 
_diffrn_reflns_theta_min          2.14 
_diffrn_reflns_theta_max          27.52 
_reflns_number_total              3545 
_reflns_number_gt                 2776 
_reflns_threshold_expression      >2\s(I) 
  
_computing_data_collection        'Bruker SMART version 5.625 (Bruker, 2001)' 
_computing_cell_refinement        'Bruker SAINT version 6.36A (Bruker, 2000)' 
_computing_data_reduction         'Bruker SAINT; SHELXTL (Sheldrick, 2008)' 
_computing_structure_solution     'SHELXS97 (Sheldrick, 2008)' 
_computing_structure_refinement   'SHELXL97 (Sheldrick, 2008)' 
_computing_molecular_graphics     ? 
_computing_publication_material  
 'enCIFer(Allen et al.,2004);PLATON(Spek,2003)' 
  
_refine_special_details 
; 
 Refinement of F^2^ against ALL reflections.  The weighted R-factor wR and 
 goodness of fit S are based on F^2^, conventional R-factors R are based 
 on F, with F set to zero for negative F^2^. The threshold expression of 
 F^2^ > 2sigma(F^2^) is used only for calculating R-factors(gt) etc. and is 
 not relevant to the choice of reflections for refinement.  R-factors based 
 on F^2^ are statistically about twice as large as those based on F, and R- 
 factors based on ALL data will be even larger. 
; 
  
_refine_ls_structure_factor_coef  Fsqd 
_refine_ls_matrix_type            full 
_refine_ls_weighting_scheme       calc 
_refine_ls_weighting_details 
 'calc w=1/[\s^2^(Fo^2^)+(0.0409P)^2^+0.9564P] where P=(Fo^2^+2Fc^2^)/3' 
_atom_sites_solution_primary      direct 
_atom_sites_solution_secondary    difmap 
_atom_sites_solution_hydrogens    geom 
_refine_ls_hydrogen_treatment     constr
_refine_ls_extinction_method      none 
_refine_ls_extinction_coef        ? 
_refine_ls_number_reflns          3545 
_refine_ls_number_parameters      241 
_refine_ls_number_restraints      0 
_refine_ls_R_factor_all           0.0503 
_refine_ls_R_factor_gt            0.0344 
_refine_ls_wR_factor_ref          0.0888 
_refine_ls_wR_factor_gt           0.0808 
_refine_ls_goodness_of_fit_ref    1.036 
_refine_ls_restrained_S_all       1.036 
_refine_ls_shift/su_max           0.001 
_refine_ls_shift/su_mean          0.000 
  
loop_ 
 _atom_site_label 
 _atom_site_type_symbol 
 _atom_site_fract_x 
 _atom_site_fract_y 
 _atom_site_fract_z 
 _atom_site_U_iso_or_equiv 
 _atom_site_adp_type 
 _atom_site_occupancy 
 _atom_site_symmetry_multiplicity 
 _atom_site_calc_flag 
 _atom_site_refinement_flags 
 _atom_site_disorder_assembly 
 _atom_site_disorder_group 
Mn Mn 1.5000 1.0000 0.5000 0.01760(12) Uani 1 2 d S . . 
C1 C 1.1156(3) 0.87085(16) 0.45354(14) 0.0211(4) Uani 1 1 d . . . 
H1A H 1.1953 0.8414 0.4994 0.025 Uiso 1 1 calc R . . 
C2 C 0.9927(2) 0.80644(16) 0.41028(14) 0.0204(4) Uani 1 1 d . . . 
H2A H 0.9894 0.7324 0.4261 0.024 Uiso 1 1 calc R . . 
C3 C 0.8731(2) 0.84833(16) 0.34356(13) 0.0195(4) Uani 1 1 d . . . 
C4 C 0.8795(3) 0.95939(17) 0.32760(14) 0.0220(4) Uani 1 1 d . . . 
H4A H 0.7961 0.9925 0.2861 0.026 Uiso 1 1 calc R . . 
C5 C 1.0043(3) 1.02102(16) 0.37087(14) 0.0221(4) Uani 1 1 d . . . 
H5A H 1.0074 1.0960 0.3586 0.026 Uiso 1 1 calc R . . 
C6 C 0.5054(3) 0.76216(17) 0.18062(14) 0.0223(4) Uani 1 1 d . . . 
H6A H 0.4101 0.7935 0.1479 0.027 Uiso 1 1 calc R . . 
C7 C 0.6093(2) 0.82433(16) 0.23968(14) 0.0207(4) Uani 1 1 d . . . 
H7A H 0.5851 0.8982 0.2474 0.025 Uiso 1 1 calc R . . 
C8 C 0.7501(2) 0.78009(16) 0.28845(13) 0.0200(4) Uani 1 1 d . . . 
C9 C 0.7734(3) 0.66937(17) 0.27849(14) 0.0224(4) Uani 1 1 d . . . 
H9A H 0.8642 0.6352 0.3133 0.027 Uiso 1 1 calc R . . 
C10 C 0.6662(3) 0.60928(17) 0.21883(14) 0.0239(4) Uani 1 1 d . . . 
H10A H 0.6833 0.5341 0.2130 0.029 Uiso 1 1 calc R . . 
C11 C 1.3679(3) 0.69951(16) 0.39010(14) 0.0221(4) Uani 1 1 d . . . 
H11A H 1.2820 0.7241 0.3454 0.026 Uiso 1 1 calc R . . 
C12 C 1.3716(3) 0.59395(16) 0.41809(14) 0.0222(4) Uani 1 1 d . . . 
H12A H 1.2865 0.5466 0.3938 0.027 Uiso 1 1 calc R . . 
C13 C 1.4995(2) 0.55541(16) 0.48201(13) 0.0191(4) Uani 1 1 d . . . 
C14 C 1.6253(2) 0.62692(16) 0.51073(14) 0.0204(4) Uani 1 1 d . . . 
H14A H 1.7185 0.6023 0.5502 0.025 Uiso 1 1 calc R . . 
C15 C 1.6165(2) 0.73251(16) 0.48286(14) 0.0214(4) Uani 1 1 d . . . 
H15A H 1.7028 0.7805 0.5037 0.026 Uiso 1 1 calc R . . 
N1 N 1.1227(2) 0.97566(14) 0.43074(12) 0.0203(4) Uani 1 1 d . . . 
N2 N 0.5371(2) 0.65700(14) 0.16856(12) 0.0214(4) Uani 1 1 d . . . 
N3 N 1.4857(2) 0.76852(13) 0.42588(11) 0.0192(4) Uani 1 1 d . . . 
O1 O 1.24430(18) 1.03714(11) 0.46931(10) 0.0231(3) Uani 1 1 d . . . 
O2 O 0.43821(18) 0.60124(12) 0.10732(10) 0.0264(3) Uani 1 1 d . . . 
O3 O 1.47215(18) 0.87166(11) 0.40306(9) 0.0227(3) Uani 1 1 d . . . 
Cl Cl 0.92582(6) 0.37348(4) 0.36293(3) 0.02276(13) Uani 1 1 d . . . 
O1CL O 1.0370(2) 0.28480(13) 0.37666(14) 0.0431(5) Uani 1 1 d . . . 
O2CL O 1.0168(2) 0.47219(13) 0.36784(12) 0.0346(4) Uani 1 1 d . . . 
O3CL O 0.8251(2) 0.36457(15) 0.27595(11) 0.0384(4) Uani 1 1 d . . . 
O4CL O 0.8277(2) 0.37131(16) 0.43147(12) 0.0433(5) Uani 1 1 d . . . 
  
loop_ 
 _atom_site_aniso_label 
 _atom_site_aniso_U_11 
 _atom_site_aniso_U_22 
 _atom_site_aniso_U_33 
 _atom_site_aniso_U_23 
 _atom_site_aniso_U_13 
 _atom_site_aniso_U_12 
Mn 0.0183(2) 0.0140(2) 0.0188(2) 0.00039(16) -0.00144(16) -0.00026(16) 
C1 0.0219(10) 0.0207(10) 0.0196(10) 0.0008(8) 0.0009(8) 0.0027(8) 
C2 0.0219(11) 0.0186(9) 0.0208(10) 0.0016(8) 0.0041(8) -0.0003(8) 
C3 0.0175(10) 0.0212(10) 0.0198(10) -0.0018(8) 0.0033(8) 0.0004(8) 
C4 0.0205(10) 0.0223(10) 0.0217(10) -0.0001(8) -0.0003(8) 0.0023(8) 
C5 0.0224(10) 0.0185(10) 0.0247(11) 0.0008(8) 0.0024(9) 0.0017(8) 
C6 0.0191(10) 0.0248(11) 0.0222(10) -0.0015(8) 0.0016(8) 0.0035(8) 
C7 0.0208(10) 0.0190(10) 0.0221(10) -0.0019(8) 0.0036(8) 0.0011(8) 
C8 0.0206(10) 0.0211(10) 0.0188(10) -0.0007(8) 0.0043(8) -0.0015(8) 
C9 0.0201(10) 0.0232(10) 0.0225(10) 0.0009(8) 0.0001(8) 0.0015(8) 
C10 0.0259(11) 0.0199(10) 0.0251(11) -0.0009(8) 0.0021(9) 0.0019(8) 
C11 0.0210(10) 0.0210(10) 0.0226(10) -0.0008(8) -0.0008(8) 0.0005(8) 
C12 0.0204(11) 0.0206(10) 0.0241(11) -0.0016(8) -0.0005(9) -0.0030(8) 
C13 0.0201(10) 0.0171(10) 0.0207(10) -0.0019(8) 0.0056(8) 0.0002(8) 
C14 0.0197(10) 0.0183(10) 0.0222(10) 0.0005(8) 0.0004(8) -0.0002(8) 
C15 0.0206(10) 0.0190(10) 0.0238(10) -0.0010(8) 0.0019(8) -0.0034(8) 
N1 0.0182(9) 0.0212(9) 0.0212(9) -0.0032(7) 0.0024(7) -0.0009(7) 
N2 0.0190(9) 0.0226(9) 0.0221(9) -0.0043(7) 0.0019(7) -0.0016(7) 
N3 0.0227(9) 0.0151(8) 0.0198(8) -0.0001(7) 0.0039(7) 0.0002(7) 
O1 0.0190(7) 0.0191(7) 0.0289(8) -0.0047(6) -0.0025(6) -0.0021(6) 
O2 0.0226(8) 0.0263(8) 0.0279(8) -0.0107(6) -0.0019(6) -0.0015(6) 
O3 0.0308(8) 0.0132(7) 0.0227(7) 0.0008(6) 0.0009(6) -0.0001(6) 
Cl 0.0198(3) 0.0233(3) 0.0239(3) 0.00111(19) 0.0003(2) -0.00304(19) 
O1CL 0.0354(10) 0.0249(9) 0.0654(13) 0.0010(8) -0.0012(9) 0.0026(7) 
O2CL 0.0298(9) 0.0247(8) 0.0453(10) 0.0064(7) -0.0052(8) -0.0062(7) 
O3CL 0.0320(9) 0.0545(11) 0.0254(9) 0.0020(8) -0.0043(7) -0.0130(8) 
O4CL 0.0353(10) 0.0636(13) 0.0328(10) -0.0077(9) 0.0110(8) -0.0112(9) 
  
_geom_special_details 
; 
 All esds (except the esd in the dihedral angle between two l.s. planes) 
 are estimated using the full covariance matrix.  The cell esds are taken 
 into account individually in the estimation of esds in distances, angles 
 and torsion angles; correlations between esds in cell parameters are only 
 used when they are defined by crystal symmetry.  An approximate (isotropic) 
 treatment of cell esds is used for estimating esds involving l.s. planes. 
; 
  
loop_ 
 _geom_bond_atom_site_label_1 
 _geom_bond_atom_site_label_2 
 _geom_bond_distance 
 _geom_bond_site_symmetry_2 
 _geom_bond_publ_flag 
Mn O3 2.1469(14) . ? 
Mn O1 2.1747(15) . ? 
Mn O2 2.1821(15) 4_676 ? 
C1 N1 1.349(3) . ? 
C1 C2 1.380(3) . ? 
C2 C3 1.396(3) . ? 
C3 C4 1.401(3) . ? 
C3 C8 1.478(3) . ? 
C4 C5 1.371(3) . ? 
C5 N1 1.348(3) . ? 
C6 N2 1.350(3) . ? 
C6 C7 1.373(3) . ? 
C7 C8 1.397(3) . ? 
C8 C9 1.399(3) . ? 
C9 C10 1.379(3) . ? 
C10 N2 1.351(3) . ? 
C11 N3 1.351(3) . ? 
C11 C12 1.374(3) . ? 
C12 C13 1.401(3) . ? 
C13 C14 1.393(3) . ? 
C13 C13 1.477(4) 3_866 ? 
C14 C15 1.374(3) . ? 
C15 N3 1.352(3) . ? 
N1 O1 1.329(2) . ? 
N2 O2 1.327(2) . ? 
N3 O3 1.325(2) . ? 
Cl O4CL 1.4319(18) . ? 
Cl O1CL 1.4369(18) . ? 
Cl O3CL 1.4384(17) . ? 
Cl O2CL 1.4400(16) . ? 
  
loop_ 
 _geom_angle_atom_site_label_1 
 _geom_angle_atom_site_label_2 
 _geom_angle_atom_site_label_3 
 _geom_angle 
 _geom_angle_site_symmetry_1 
 _geom_angle_site_symmetry_3 
 _geom_angle_publ_flag 
O3 Mn O3 180.000(1) . 3_876 ? 
O3 Mn O1 88.59(6) . 3_876 ? 
O3 Mn O1 91.41(6) 3_876 3_876 ? 
O3 Mn O1 91.41(6) . . ? 
O3 Mn O1 88.59(6) 3_876 . ? 
O1 Mn O1 180.0 3_876 . ? 
O3 Mn O2 93.83(6) . 4_676 ? 
O3 Mn O2 86.17(6) 3_876 4_676 ? 
O1 Mn O2 94.32(6) 3_876 4_676 ? 
O1 Mn O2 85.68(6) . 4_676 ? 
O3 Mn O2 86.17(6) . 2_755 ? 
O3 Mn O2 93.83(6) 3_876 2_755 ? 
O1 Mn O2 85.68(6) 3_876 2_755 ? 
O1 Mn O2 94.32(6) . 2_755 ? 
O2 Mn O2 180.0 4_676 2_755 ? 
N1 C1 C2 120.00(19) . . ? 
C1 C2 C3 121.01(19) . . ? 
C2 C3 C4 116.46(19) . . ? 
C2 C3 C8 122.78(19) . . ? 
C4 C3 C8 120.69(18) . . ? 
C5 C4 C3 121.0(2) . . ? 
N1 C5 C4 120.31(19) . . ? 
N2 C6 C7 120.73(19) . . ? 
C6 C7 C8 120.67(19) . . ? 
C7 C8 C9 116.83(19) . . ? 
C7 C8 C3 121.42(18) . . ? 
C9 C8 C3 121.65(19) . . ? 
C10 C9 C8 120.8(2) . . ? 
N2 C10 C9 120.21(19) . . ? 
N3 C11 C12 120.30(19) . . ? 
C11 C12 C13 120.71(19) . . ? 
C14 C13 C12 116.81(18) . . ? 
C14 C13 C13 121.5(2) . 3_866 ? 
C12 C13 C13 121.7(2) . 3_866 ? 
C15 C14 C13 120.94(19) . . ? 
N3 C15 C14 120.29(19) . . ? 
O1 N1 C5 118.67(17) . . ? 
O1 N1 C1 120.41(17) . . ? 
C5 N1 C1 120.88(18) . . ? 
O2 N2 C6 118.84(17) . . ? 
O2 N2 C10 120.71(17) . . ? 
C6 N2 C10 120.44(18) . . ? 
O3 N3 C11 118.94(17) . . ? 
O3 N3 C15 120.55(17) . . ? 
C11 N3 C15 120.51(17) . . ? 
N1 O1 Mn 129.30(12) . . ? 
N2 O2 Mn 127.94(12) . 2_745 ? 
N3 O3 Mn 123.00(11) . . ? 
O4CL Cl O1CL 109.00(12) . . ? 
O4CL Cl O3CL 109.51(11) . . ? 
O1CL Cl O3CL 109.88(12) . . ? 
O4CL Cl O2CL 110.38(11) . . ? 
O1CL Cl O2CL 108.35(10) . . ? 
O3CL Cl O2CL 109.72(11) . . ? 
  
_diffrn_measured_fraction_theta_max    0.991 
_diffrn_reflns_theta_full              27.50 
_diffrn_measured_fraction_theta_full   0.992 
_refine_diff_density_max    0.480 
_refine_diff_density_min   -0.312 
_refine_diff_density_rms    0.067 

#===END of CIF
  
data_compound_4_CUNDBF 
  
_audit_creation_method         'enCIFer editing of SHELXL97 CIF output' 
_chemical_name_systematic 
; 
 ? 
; 
_chemical_name_common             ? 
_chemical_melting_point           ? 
_chemical_formula_moiety         'C30 H24 Cu N6 O6, 2(B F 4)'
_chemical_formula_sum            'C30 H24 B2 Cu F8 N6 O6' 
_chemical_formula_weight          801.71 
  
loop_ 
 _atom_type_symbol 
 _atom_type_description 
 _atom_type_scat_dispersion_real 
 _atom_type_scat_dispersion_imag 
 _atom_type_scat_source 
 'C'  'C'   0.0033   0.0016 
 'International Tables Vol C Tables 4.2.6.8 and 6.1.1.4' 
 'H'  'H'   0.0000   0.0000 
 'International Tables Vol C Tables 4.2.6.8 and 6.1.1.4' 
 'B'  'B'   0.0013   0.0007 
 'International Tables Vol C Tables 4.2.6.8 and 6.1.1.4' 
 'N'  'N'   0.0061   0.0033 
 'International Tables Vol C Tables 4.2.6.8 and 6.1.1.4' 
 'O'  'O'   0.0106   0.0060 
 'International Tables Vol C Tables 4.2.6.8 and 6.1.1.4' 
 'F'  'F'   0.0171   0.0103 
 'International Tables Vol C Tables 4.2.6.8 and 6.1.1.4' 
 'Cu'  'Cu'   0.3201   1.2651 
 'International Tables Vol C Tables 4.2.6.8 and 6.1.1.4' 
  
_symmetry_cell_setting            Monoclinic 
_symmetry_space_group_name_H-M    'P 21/c' 
  
loop_ 
 _symmetry_equiv_pos_as_xyz 
 'x, y, z' 
 '-x, y+1/2, -z+1/2' 
 '-x, -y, -z' 
 'x, -y-1/2, z-1/2' 
  
_cell_length_a                    8.3593(8) 
_cell_length_b                    12.3297(11) 
_cell_length_c                    15.0316(14) 
_cell_angle_alpha                 90.00 
_cell_angle_beta                  100.566(2) 
_cell_angle_gamma                 90.00 
_cell_volume                      1523.0(4) 
_cell_formula_units_Z             2 
_cell_measurement_temperature     150(2) 
_cell_measurement_reflns_used     7392 
_cell_measurement_theta_min       2.5 
_cell_measurement_theta_max       27.5 
  
_exptl_crystal_description        column 
_exptl_crystal_colour             orange 
_exptl_crystal_size_max           0.85 
_exptl_crystal_size_mid           0.29 
_exptl_crystal_size_min           0.19 
_exptl_crystal_density_meas       ? 
_exptl_crystal_density_diffrn     1.748 
_exptl_crystal_density_method     'not measured' 
_exptl_crystal_F_000              810 
_exptl_absorpt_coefficient_mu     0.824 
_exptl_absorpt_correction_type    multi-scan 
_exptl_absorpt_correction_T_min   0.884 
_exptl_absorpt_correction_T_max   1.000 
_exptl_absorpt_process_details   'Bruker SADABS v2.03' 
  
_exptl_special_details 
; 
 ? 
; 
  
_diffrn_ambient_temperature       150(2) 
_diffrn_radiation_wavelength      0.71073 
_diffrn_radiation_type            MoK\a 
_diffrn_radiation_source          'normal-focus sealed tube' 
_diffrn_radiation_monochromator   graphite 
_diffrn_measurement_device_type   'Bruker SMART APEX CCD area detector' 
_diffrn_measurement_method        \w
_diffrn_detector_area_resol_mean  ? 
_diffrn_standards_number          0 
_diffrn_standards_interval_count  . 
_diffrn_standards_interval_time   ? 
_diffrn_standards_decay_%         0 
_diffrn_reflns_number             13825 
_diffrn_reflns_av_R_equivalents   0.017 
_diffrn_reflns_av_sigmaI/netI     0.016 
_diffrn_reflns_limit_h_min       -10 
_diffrn_reflns_limit_h_max        10 
_diffrn_reflns_limit_k_min       -15
_diffrn_reflns_limit_k_max        16 
_diffrn_reflns_limit_l_min       -19 
_diffrn_reflns_limit_l_max        19 
_diffrn_reflns_theta_min          2.15 
_diffrn_reflns_theta_max          27.58 
_reflns_number_total              3663 
_reflns_number_gt                 3213 
_reflns_threshold_expression      >2\s(I) 
  
_computing_data_collection        'Bruker SMART version 5.625 (Bruker, 2001)' 
_computing_cell_refinement        'Bruker SAINT version 6.36A (Bruker, 2000)' 
_computing_data_reduction         'Bruker SAINT; SHELXTL (Sheldrick, 2008)' 
_computing_structure_solution     'SHELXS97 (Sheldrick, 2008)' 
_computing_structure_refinement   'SHELXL97 (Sheldrick, 2008)' 
_computing_molecular_graphics     ? 
_computing_publication_material 'enCIFer(Allen et al.,2004);PLATON(Spek,2003)' 
  
_refine_special_details 
; 
  ? 
; 
  
_refine_ls_structure_factor_coef  Fsqd 
_refine_ls_matrix_type            full 
_refine_ls_weighting_scheme       calc 
_refine_ls_weighting_details 
 'calc w=1/[\s^2^(Fo^2^)+(0.045P)^2^+0.833P] where P=(Fo^2^+2Fc^2^)/3' 
_atom_sites_solution_primary      direct 
_atom_sites_solution_secondary    difmap 
_atom_sites_solution_hydrogens    geom 
_refine_ls_hydrogen_treatment     constr
_refine_ls_extinction_method      none 
_refine_ls_extinction_coef        ? 
_refine_ls_number_reflns          3495 
_refine_ls_number_parameters      241 
_refine_ls_number_restraints      0 
_refine_ls_R_factor_all           0.0329 
_refine_ls_R_factor_gt            0.0298 
_refine_ls_wR_factor_ref          0.0806 
_refine_ls_wR_factor_gt           0.0781 
_refine_ls_goodness_of_fit_ref    1.06 
_refine_ls_restrained_S_all       1.06 
_refine_ls_shift/su_max           0.000 
_refine_ls_shift/su_mean          0.000 
  
loop_ 
 _atom_site_label 
 _atom_site_type_symbol 
 _atom_site_fract_x 
 _atom_site_fract_y 
 _atom_site_fract_z 
 _atom_site_U_iso_or_equiv 
 _atom_site_adp_type 
 _atom_site_occupancy 
 _atom_site_symmetry_multiplicity 
 _atom_site_calc_flag 
 _atom_site_refinement_flags 
 _atom_site_disorder_assembly 
 _atom_site_disorder_group 
Cu1 Cu 0.0000 0.5000 0.0000 0.01603(9) Uani 1 2 d S . . 
O1 O 0.23314(12) 0.53925(9) 0.02231(8) 0.0213(2) Uani 1 1 d . . . 
O2 O 1.06650(14) 0.09940(10) 0.37380(8) 0.0274(3) Uani 1 1 d . . . 
O3 O 0.04168(13) 0.37844(8) 0.08662(7) 0.0196(2) Uani 1 1 d . . . 
N1 N 0.35632(15) 0.47568(10) 0.06075(8) 0.0177(2) Uani 1 1 d . . . 
N2 N 0.96433(15) 0.15630(11) 0.31464(9) 0.0209(3) Uani 1 1 d . . . 
N3 N 0.02382(15) 0.27419(10) 0.06386(8) 0.0170(2) Uani 1 1 d . . . 
C1 C 0.36947(17) 0.37268(12) 0.03261(10) 0.0187(3) Uani 1 1 d . . . 
H5B H 0.2916 0.3445 -0.0159 0.022 Uiso 1 1 calc R . . 
C2 C 0.49641(18) 0.30844(12) 0.07448(10) 0.0194(3) Uani 1 1 d . . . 
H2A H 0.5041 0.2355 0.0554 0.023 Uiso 1 1 calc R . . 
C3 C 0.61371(17) 0.34964(12) 0.14467(10) 0.0180(3) Uani 1 1 d . . . 
C4 C 0.60125(18) 0.45912(13) 0.16631(10) 0.0201(3) Uani 1 1 d . . . 
H4A H 0.6832 0.4915 0.2105 0.024 Uiso 1 1 calc R . . 
C5 C 0.47189(18) 0.52053(12) 0.12451(10) 0.0198(3) Uani 1 1 d . . . 
H5A H 0.4639 0.5946 0.1405 0.024 Uiso 1 1 calc R . . 
C6 C 0.99484(18) 0.26272(13) 0.30237(10) 0.0217(3) Uani 1 1 d . . . 
H6A H 1.0928 0.2942 0.3337 0.026 Uiso 1 1 calc R . . 
C7 C 0.88538(18) 0.32560(12) 0.24497(10) 0.0199(3) Uani 1 1 d . . . 
H7A H 0.9083 0.4001 0.2373 0.024 Uiso 1 1 calc R . . 
C8 C 0.74058(17) 0.28083(12) 0.19778(10) 0.0184(3) Uani 1 1 d . . . 
C9 C 0.71777(19) 0.16931(12) 0.20796(10) 0.0214(3) Uani 1 1 d . . . 
H9A H 0.6241 0.1350 0.1742 0.026 Uiso 1 1 calc R . . 
C10 C 0.82949(19) 0.10868(13) 0.26628(11) 0.0228(3) Uani 1 1 d . . . 
H10A H 0.8121 0.0332 0.2727 0.027 Uiso 1 1 calc R . . 
C11 C -0.10624(18) 0.23856(12) 0.00407(10) 0.0202(3) Uani 1 1 d . . . 
H11A H -0.1895 0.2879 -0.0212 0.024 Uiso 1 1 calc R . . 
C12 C -0.11842(18) 0.13079(12) -0.02023(10) 0.0202(3) Uani 1 1 d . . . 
H12A H -0.2109 0.1063 -0.0618 0.024 Uiso 1 1 calc R . . 
C13 C 0.00320(17) 0.05699(12) 0.01531(10) 0.0178(3) Uani 1 1 d . . . 
C14 C 0.13089(18) 0.09619(12) 0.08085(10) 0.0209(3) Uani 1 1 d . . . 
H14A H 0.2135 0.0479 0.1089 0.025 Uiso 1 1 calc R . . 
C15 C 0.13816(18) 0.20390(12) 0.10510(10) 0.0202(3) Uani 1 1 d . . . 
H15A H 0.2238 0.2290 0.1510 0.024 Uiso 1 1 calc R . . 
B1 B 0.5679(2) 0.86652(15) 0.14408(12) 0.0237(4) Uani 1 1 d . . . 
F1 F 0.45776(14) 0.78074(9) 0.12860(9) 0.0405(3) Uani 1 1 d . . . 
F2 F 0.66454(13) 0.85726(10) 0.22947(7) 0.0388(3) Uani 1 1 d . . . 
F3 F 0.66606(13) 0.86480(10) 0.07924(7) 0.0393(3) Uani 1 1 d . . . 
F4 F 0.47936(12) 0.96301(9) 0.13929(7) 0.0331(2) Uani 1 1 d . . . 
  
loop_ 
 _atom_site_aniso_label 
 _atom_site_aniso_U_11 
 _atom_site_aniso_U_22 
 _atom_site_aniso_U_33 
 _atom_site_aniso_U_23 
 _atom_site_aniso_U_13 
 _atom_site_aniso_U_12 
Cu1 0.01471(13) 0.01208(13) 0.01968(14) 0.00152(9) -0.00112(9) -0.00040(8) 
O1 0.0156(5) 0.0162(5) 0.0299(6) 0.0047(4) -0.0016(4) 0.0012(4) 
O2 0.0208(5) 0.0281(6) 0.0306(6) 0.0107(5) -0.0025(4) 0.0032(4) 
O3 0.0255(5) 0.0110(5) 0.0207(5) -0.0005(4) 0.0000(4) -0.0011(4) 
N1 0.0155(6) 0.0165(6) 0.0204(6) 0.0029(5) 0.0020(5) 0.0005(4) 
N2 0.0172(6) 0.0227(6) 0.0221(6) 0.0045(5) 0.0016(5) 0.0020(5) 
N3 0.0200(6) 0.0122(6) 0.0186(6) -0.0002(4) 0.0031(5) -0.0006(4) 
C1 0.0178(7) 0.0179(7) 0.0194(6) -0.0011(5) 0.0008(5) -0.0011(5) 
C2 0.0194(7) 0.0173(7) 0.0213(7) -0.0008(5) 0.0029(5) 0.0009(5) 
C3 0.0162(6) 0.0201(7) 0.0177(6) 0.0015(5) 0.0031(5) 0.0003(5) 
C4 0.0197(7) 0.0198(7) 0.0198(7) -0.0007(6) 0.0007(5) -0.0017(6) 
C5 0.0192(7) 0.0172(7) 0.0225(7) -0.0017(5) 0.0028(6) -0.0019(5) 
C6 0.0171(7) 0.0241(8) 0.0234(7) 0.0005(6) 0.0025(5) -0.0023(6) 
C7 0.0188(7) 0.0194(7) 0.0214(7) 0.0008(5) 0.0038(5) -0.0011(5) 
C8 0.0173(7) 0.0204(7) 0.0177(6) 0.0004(5) 0.0035(5) 0.0012(5) 
C9 0.0192(7) 0.0199(7) 0.0237(7) -0.0006(6) 0.0003(5) -0.0015(6) 
C10 0.0212(7) 0.0192(7) 0.0274(8) 0.0013(6) 0.0030(6) -0.0008(6) 
C11 0.0186(7) 0.0178(7) 0.0228(7) 0.0005(6) 0.0003(5) 0.0013(5) 
C12 0.0182(7) 0.0172(7) 0.0236(7) -0.0012(5) -0.0007(5) 0.0005(5) 
C13 0.0186(7) 0.0156(8) 0.0194(7) 0.0008(5) 0.0039(5) -0.0001(5) 
C14 0.0205(7) 0.0168(7) 0.0236(7) 0.0015(6) -0.0003(6) 0.0023(5) 
C15 0.0200(7) 0.0179(7) 0.0209(7) 0.0006(5) -0.0006(5) -0.0003(5) 
B1 0.0210(8) 0.0248(9) 0.0241(8) -0.0027(7) 0.0012(6) 0.0022(7) 
F1 0.0368(6) 0.0236(5) 0.0593(7) -0.0030(5) 0.0038(5) -0.0042(4) 
F2 0.0324(6) 0.0548(7) 0.0261(5) -0.0021(5) -0.0026(4) 0.0150(5) 
F3 0.0326(6) 0.0564(7) 0.0306(5) 0.0002(5) 0.0099(4) 0.0049(5) 
F4 0.0300(5) 0.0248(5) 0.0412(6) -0.0037(4) -0.0019(4) 0.0053(4) 
  
_geom_special_details 
; 
 All esds (except the esd in the dihedral angle between two l.s. planes) 
 are estimated using the full covariance matrix.  The cell esds are taken 
 into account individually in the estimation of esds in distances, angles 
 and torsion angles; correlations between esds in cell parameters are only 
 used when they are defined by crystal symmetry.  An approximate (isotropic) 
 treatment of cell esds is used for estimating esds involving l.s. planes. 
; 
  
loop_ 
 _geom_bond_atom_site_label_1 
 _geom_bond_atom_site_label_2 
 _geom_bond_distance 
 _geom_bond_site_symmetry_2 
 _geom_bond_publ_flag 
Cu1 O1 1.9761(10) . ? 
Cu1 O2 2.4075(12) 2_655 ? 
Cu1 O3 1.9740(10) . ? 
O1 N1 1.3380(16) . ? 
O2 N2 1.3168(16) . ? 
O3 N3 1.3314(15) . ? 
N1 C5 1.3484(19) . ? 
N1 C1 1.3493(19) . ? 
N2 C6 1.356(2) . ? 
N2 C10 1.358(2) . ? 
N3 C11 1.3507(19) . ? 
N3 C15 1.3534(19) . ? 
C1 C2 1.380(2) . ? 
C2 C3 1.398(2) . ? 
C3 C4 1.397(2) . ? 
C3 C8 1.474(2) . ? 
C4 C5 1.374(2) . ? 
C6 C7 1.376(2) . ? 
C7 C8 1.399(2) . ? 
C8 C9 1.400(2) . ? 
C9 C10 1.378(2) . ? 
C11 C12 1.377(2) . ? 
C12 C13 1.396(2) . ? 
C13 C14 1.399(2) . ? 
C13 C13 1.477(3) 3 ? 
C14 C15 1.376(2) . ? 
B1 F1 1.394(2) . ? 
B1 F2 1.390(2) . ? 
B1 F3 1.384(2) . ? 
B1 F4 1.396(2) . ? 
  
loop_ 
 _geom_angle_atom_site_label_1 
 _geom_angle_atom_site_label_2 
 _geom_angle_atom_site_label_3 
 _geom_angle 
 _geom_angle_site_symmetry_1 
 _geom_angle_site_symmetry_3 
 _geom_angle_publ_flag 
O3 Cu1 O1 91.42(4) . . ? 
O3 Cu1 O2 84.56(4) . 2_655 ? 
O1 Cu1 O2 96.01(4) . 2_655 ? 
O3 Cu1 O2 95.44(4) . 4_465 ? 
N1 O1 Cu1 125.92(9) . . ? 
N2 O2 Cu1 126.05(9) . 2_645 ? 
N3 O3 Cu1 124.44(8) . . ? 
O1 N1 C5 117.45(12) . . ? 
O1 N1 C1 121.10(12) . . ? 
C5 N1 C1 121.32(13) . . ? 
O2 N2 C6 119.51(13) . . ? 
O2 N2 C10 120.21(13) . . ? 
C6 N2 C10 120.28(13) . . ? 
O3 N3 C11 121.58(12) . . ? 
O3 N3 C15 117.65(12) . . ? 
C11 N3 C15 120.74(12) . . ? 
N1 C1 C2 119.82(13) . . ? 
C1 C2 C3 120.67(14) . . ? 
C4 C3 C2 117.07(13) . . ? 
C4 C3 C8 120.48(13) . . ? 
C2 C3 C8 122.37(14) . . ? 
C5 C4 C3 120.80(14) . . ? 
N1 C5 C4 120.02(14) . . ? 
N2 C6 C7 120.70(14) . . ? 
C6 C7 C8 120.63(14) . . ? 
C7 C8 C9 117.03(13) . . ? 
C7 C8 C3 121.15(14) . . ? 
C9 C8 C3 121.71(13) . . ? 
C10 C9 C8 120.81(14) . . ? 
N2 C10 C9 120.34(14) . . ? 
N3 C11 C12 120.12(13) . . ? 
C11 C12 C13 120.96(14) . . ? 
C12 C13 C14 116.90(13) . . ? 
C12 C13 C13 121.26(16) . 3 ? 
C14 C13 C13 121.84(16) . 3 ? 
C15 C14 C13 120.72(14) . . ? 
N3 C15 C14 120.25(13) . . ? 
F3 B1 F2 109.27(14) . . ? 
F3 B1 F1 109.24(14) . . ? 
F2 B1 F1 110.24(15) . . ? 
F3 B1 F4 110.72(15) . . ? 
F2 B1 F4 109.30(14) . . ? 
F1 B1 F4 108.06(13) . . ? 
  
_diffrn_measured_fraction_theta_max    0.994 
_diffrn_reflns_theta_full              27.50 
_diffrn_measured_fraction_theta_full   0.999 

_refine_diff_density_max    0.46
_refine_diff_density_min   -0.18 
_refine_diff_density_rms    0.07

#===END Of CIF 

  
data_compound_5_CDNOCX 
  
_audit_creation_method         'enCIFer editing of SHELXL97 CIF output' 
_chemical_name_systematic 
; 
 ? 
; 
_chemical_name_common             ? 
_chemical_melting_point           ? 
_chemical_formula_moiety         'C20 H16 Cd N6 O10' 
_chemical_formula_sum            'C20 H16 Cd N6 O10' 
_chemical_formula_weight          612.79 
  
loop_ 
 _atom_type_symbol 
 _atom_type_description 
 _atom_type_scat_dispersion_real 
 _atom_type_scat_dispersion_imag 
 _atom_type_scat_source 
 'C'  'C'   0.0033   0.0016 
 'International Tables Vol C Tables 4.2.6.8 and 6.1.1.4' 
 'H'  'H'   0.0000   0.0000 
 'International Tables Vol C Tables 4.2.6.8 and 6.1.1.4' 
 'N'  'N'   0.0061   0.0033 
 'International Tables Vol C Tables 4.2.6.8 and 6.1.1.4' 
 'O'  'O'   0.0106   0.0060 
 'International Tables Vol C Tables 4.2.6.8 and 6.1.1.4' 
 'Cd'  'Cd'  -0.8075   1.2024 
 'International Tables Vol C Tables 4.2.6.8 and 6.1.1.4' 
  
_symmetry_cell_setting            Monoclinic 
_symmetry_space_group_name_H-M   'P 21/c'
  
loop_ 
 _symmetry_equiv_pos_as_xyz 
 'x, y, z' 
 '-x, y+1/2, -z+1/2' 
 '-x, -y, -z' 
 'x, -y-1/2, z-1/2' 
  
_cell_length_a                    9.1248(8) 
_cell_length_b                    16.8177(15) 
_cell_length_c                    7.4667(7) 
_cell_angle_alpha                 90.00 
_cell_angle_beta                  105.095(1) 
_cell_angle_gamma                 90.00 
_cell_volume                      1106.3(3) 
_cell_formula_units_Z             2 
_cell_measurement_temperature     150(2) 
_cell_measurement_reflns_used     6454 
_cell_measurement_theta_min       2.3 
_cell_measurement_theta_max       27.5 
  
_exptl_crystal_description        column
_exptl_crystal_colour             colourless 
_exptl_crystal_size_max           0.39 
_exptl_crystal_size_mid           0.11 
_exptl_crystal_size_min           0.08 
_exptl_crystal_density_meas       ? 
_exptl_crystal_density_diffrn     1.840 
_exptl_crystal_density_method     'not measured' 
_exptl_crystal_F_000              612 
_exptl_absorpt_coefficient_mu     1.060 
_exptl_absorpt_correction_type    multi-scan 
_exptl_absorpt_correction_T_min   0.889 
_exptl_absorpt_correction_T_max   1.000 
_exptl_absorpt_process_details   '(SADABS version 2.03; Bruker, 2001)'
  
_exptl_special_details 
; 
 ? 
; 
  
_diffrn_ambient_temperature       150(2) 
_diffrn_radiation_wavelength      0.71073 
_diffrn_radiation_type            MoK\a 
_diffrn_radiation_source         'normal-focus sealed tube' 
_diffrn_radiation_monochromator   graphite 
_diffrn_measurement_device_type  'Bruker SMART1000 CCD area detector' 
_diffrn_measurement_method        \w
_diffrn_detector_area_resol_mean  ? 
_diffrn_standards_number          0 
_diffrn_standards_interval_count  . 
_diffrn_standards_interval_time   ? 
_diffrn_standards_decay_%         0 
_diffrn_reflns_number             9776 
_diffrn_reflns_av_R_equivalents   0.012 
_diffrn_reflns_av_sigmaI/netI     0.012 
_diffrn_reflns_limit_h_min       -11 
_diffrn_reflns_limit_h_max        11 
_diffrn_reflns_limit_k_min        0 
_diffrn_reflns_limit_k_max        21 
_diffrn_reflns_limit_l_min        0 
_diffrn_reflns_limit_l_max        9 
_diffrn_reflns_theta_min          2.31 
_diffrn_reflns_theta_max          27.50 
_reflns_number_total              2521 
_reflns_number_gt                 2298 
_reflns_threshold_expression      >2\s(I) 
  
_computing_data_collection        'Bruker SMART version 5.624 (Bruker, 2001)' 
_computing_cell_refinement        'Bruker SAINT version 6.36A (Bruker, 2002)' 
_computing_data_reduction         'Bruker SAINT; SHELXTL (Sheldrick, 2008)' 
_computing_structure_solution     'SHELXS97 (Sheldrick, 2008)' 
_computing_structure_refinement   'SHELXL97 (Sheldrick, 2008)' 
_computing_molecular_graphics     'Bruker SHELXTL' 
_computing_publication_material 'enCIFer(Allen et al.,2004);PLATON(Spek,2003)' 
  
_refine_special_details 
; 
  ? 
; 
  
_refine_ls_structure_factor_coef  Fsqd 
_refine_ls_matrix_type            full 
_refine_ls_weighting_scheme       calc 
_refine_ls_weighting_details 
 'calc w=1/[\s^2^(Fo^2^)+(0.023P)^2^+0.786P] where P=(Fo^2^+2Fc^2^)/3' 
_atom_sites_solution_primary      direct 
_atom_sites_solution_secondary    difmap 
_atom_sites_solution_hydrogens    geom 
_refine_ls_hydrogen_treatment     constr
_refine_ls_extinction_method      none 
_refine_ls_extinction_coef        ? 
_refine_ls_number_reflns          2521 
_refine_ls_number_parameters      169 
_refine_ls_number_restraints      0 
_refine_ls_R_factor_all           0.0213 
_refine_ls_R_factor_gt            0.0187 
_refine_ls_wR_factor_ref          0.0476 
_refine_ls_wR_factor_gt           0.0462 
_refine_ls_goodness_of_fit_ref    1.04 
_refine_ls_restrained_S_all       1.04 
_refine_ls_shift/su_max           0.000 
_refine_ls_shift/su_mean          0.000 
  
loop_ 
 _atom_site_label 
 _atom_site_type_symbol 
 _atom_site_fract_x 
 _atom_site_fract_y 
 _atom_site_fract_z 
 _atom_site_U_iso_or_equiv 
 _atom_site_adp_type 
 _atom_site_occupancy 
 _atom_site_symmetry_multiplicity 
 _atom_site_calc_flag 
 _atom_site_refinement_flags 
 _atom_site_disorder_assembly 
 _atom_site_disorder_group 
Cd1 Cd 0.5000 0.0000 0.5000 0.01922(6) Uani 1 2 d S . . 
O1 O 0.43764(13) 0.09818(7) 0.68264(16) 0.0260(2) Uani 1 1 d . . . 
O2 O -0.28155(12) 0.52150(7) 0.23458(16) 0.0225(2) Uani 1 1 d . . . 
O3 O 0.57065(14) 0.10875(8) 0.3575(2) 0.0382(3) Uani 1 1 d . . . 
O4 O 0.72916(14) 0.17546(7) 0.24786(19) 0.0323(3) Uani 1 1 d . . . 
O5 O 0.79813(14) 0.06339(8) 0.3873(2) 0.0356(3) Uani 1 1 d . . . 
N1 N 0.34594(14) 0.15793(8) 0.60961(18) 0.0206(3) Uani 1 1 d . . . 
N2 N -0.17906(14) 0.46452(8) 0.29239(18) 0.0192(3) Uani 1 1 d . . . 
N3 N 0.70107(15) 0.11544(8) 0.32999(18) 0.0220(3) Uani 1 1 d . . . 
C1 C 0.39751(17) 0.23385(10) 0.6312(2) 0.0233(3) Uani 1 1 d . . . 
H1A H 0.5013 0.2439 0.6901 0.028 Uiso 1 1 calc R . . 
C2 C 0.30037(18) 0.29646(9) 0.5682(2) 0.0225(3) Uani 1 1 d . . . 
H2A H 0.3373 0.3495 0.5841 0.027 Uiso 1 1 calc R . . 
C3 C 0.14757(17) 0.28212(9) 0.4810(2) 0.0192(3) Uani 1 1 d . . . 
C4 C 0.09978(17) 0.20298(9) 0.4564(2) 0.0213(3) Uani 1 1 d . . . 
H4A H -0.0026 0.1912 0.3941 0.026 Uiso 1 1 calc R . . 
C5 C 0.19991(17) 0.14209(9) 0.5219(2) 0.0207(3) Uani 1 1 d . . . 
H5A H 0.1661 0.0885 0.5053 0.025 Uiso 1 1 calc R . . 
C6 C -0.03263(18) 0.47748(9) 0.2915(2) 0.0210(3) Uani 1 1 d . . . 
H6A H -0.0049 0.5266 0.2466 0.025 Uiso 1 1 calc R . . 
C7 C 0.07638(17) 0.42018(9) 0.3551(2) 0.0201(3) Uani 1 1 d . . . 
H7A H 0.1789 0.4304 0.3559 0.024 Uiso 1 1 calc R . . 
C8 C 0.03698(17) 0.34717(9) 0.4185(2) 0.0194(3) Uani 1 1 d . . . 
C9 C -0.11445(17) 0.33684(9) 0.4209(2) 0.0228(3) Uani 1 1 d . . . 
H9A H -0.1449 0.2884 0.4659 0.027 Uiso 1 1 calc R . . 
C10 C -0.22005(17) 0.39583(9) 0.3592(2) 0.0226(3) Uani 1 1 d . . . 
H10A H -0.3222 0.3882 0.3636 0.027 Uiso 1 1 calc R . . 
  
loop_ 
 _atom_site_aniso_label 
 _atom_site_aniso_U_11 
 _atom_site_aniso_U_22 
 _atom_site_aniso_U_33 
 _atom_site_aniso_U_23 
 _atom_site_aniso_U_13 
 _atom_site_aniso_U_12 
Cd1 0.01512(8) 0.01402(8) 0.02568(9) -0.00013(6) 0.00024(6) 0.00078(5) 
O1 0.0240(6) 0.0205(6) 0.0284(6) -0.0011(5) -0.0022(5) 0.0083(4) 
O2 0.0177(5) 0.0178(5) 0.0279(6) 0.0001(4) -0.0015(4) 0.0042(4) 
O3 0.0202(6) 0.0296(7) 0.0677(9) 0.0165(6) 0.0168(6) 0.0018(5) 
O4 0.0274(6) 0.0281(6) 0.0424(7) 0.0106(5) 0.0111(5) -0.0036(5) 
O5 0.0272(6) 0.0325(7) 0.0472(8) 0.0096(6) 0.0099(6) 0.0103(5) 
N1 0.0192(6) 0.0192(6) 0.0217(6) -0.0019(5) 0.0024(5) 0.0037(5) 
N2 0.0167(6) 0.0176(6) 0.0207(6) -0.0013(5) 0.0000(5) 0.0020(5) 
N3 0.0192(6) 0.0208(6) 0.0249(6) -0.0015(5) 0.0036(5) -0.0011(5) 
C1 0.0165(7) 0.0228(8) 0.0281(8) -0.0022(6) 0.0014(6) -0.0003(6) 
C2 0.0201(7) 0.0188(7) 0.0271(8) -0.0016(6) 0.0035(6) -0.0007(6) 
C3 0.0181(7) 0.0203(7) 0.0193(7) 0.0002(6) 0.0049(5) 0.0025(6) 
C4 0.0171(7) 0.0223(8) 0.0233(7) -0.0017(6) 0.0028(6) 0.0000(6) 
C5 0.0202(7) 0.0178(7) 0.0230(7) -0.0029(6) 0.0035(6) -0.0007(6) 
C6 0.0203(7) 0.0202(7) 0.0210(7) 0.0001(6) 0.0029(6) -0.0021(6) 
C7 0.0168(7) 0.0224(7) 0.0201(7) -0.0018(6) 0.0029(5) -0.0005(6) 
C8 0.0177(7) 0.0206(7) 0.0184(7) -0.0016(6) 0.0021(5) 0.0020(6) 
C9 0.0205(7) 0.0187(7) 0.0284(8) 0.0018(6) 0.0050(6) -0.0001(6) 
C10 0.0160(7) 0.0209(7) 0.0298(8) 0.0005(6) 0.0040(6) -0.0010(6) 
  
_geom_special_details 
; 
 All esds (except the esd in the dihedral angle between two l.s. planes) 
 are estimated using the full covariance matrix.  The cell esds are taken 
 into account individually in the estimation of esds in distances, angles 
 and torsion angles; correlations between esds in cell parameters are only 
 used when they are defined by crystal symmetry.  An approximate (isotropic) 
 treatment of cell esds is used for estimating esds involving l.s. planes. 
; 
  
loop_ 
 _geom_bond_atom_site_label_1 
 _geom_bond_atom_site_label_2 
 _geom_bond_distance 
 _geom_bond_site_symmetry_2 
 _geom_bond_publ_flag 
Cd1 O1 2.3052(11) . ? 
Cd1 O2 2.3138(11) 2_545 ? 
Cd1 O3 2.2912(13) . ? 
O1 N1 1.3302(17) . ? 
O2 N2 1.3300(17) . ? 
O2 Cd1 2.3138(11) 2 ? 
O3 N3 1.2644(18) . ? 
O4 N3 1.2420(18) . ? 
O5 N3 1.2394(18) . ? 
N1 C5 1.349(2) . ? 
N1 C1 1.356(2) . ? 
N2 C10 1.349(2) . ? 
N2 C6 1.356(2) . ? 
C1 C2 1.378(2) . ? 
C2 C3 1.398(2) . ? 
C3 C4 1.398(2) . ? 
C3 C8 1.479(2) . ? 
C4 C5 1.375(2) . ? 
C6 C7 1.377(2) . ? 
C7 C8 1.396(2) . ? 
C8 C9 1.398(2) . ? 
C9 C10 1.376(2) . ? 
  
loop_ 
 _geom_angle_atom_site_label_1 
 _geom_angle_atom_site_label_2 
 _geom_angle_atom_site_label_3 
 _geom_angle 
 _geom_angle_site_symmetry_1 
 _geom_angle_site_symmetry_3 
 _geom_angle_publ_flag 
O1 Cd1 O3 81.11(5) . . ? 
O2 Cd1 O3 79.33(4) 2_545 . ? 
O1 Cd1 O2 92.25(4) . 2_545 ? 
N1 O1 Cd1 121.63(9) . . ? 
N2 O2 Cd1 121.83(9) . 2 ? 
N3 O3 Cd1 122.48(10) . . ? 
O1 N1 C5 119.09(13) . . ? 
O1 N1 C1 120.06(13) . . ? 
C5 N1 C1 120.78(13) . . ? 
O2 N2 C10 119.85(13) . . ? 
O2 N2 C6 119.56(13) . . ? 
C10 N2 C6 120.52(13) . . ? 
O5 N3 O4 121.58(14) . . ? 
O5 N3 O3 119.95(14) . . ? 
O4 N3 O3 118.46(13) . . ? 
N1 C1 C2 120.44(14) . . ? 
C1 C2 C3 120.15(15) . . ? 
C2 C3 C4 117.69(14) . . ? 
C2 C3 C8 122.37(14) . . ? 
C4 C3 C8 119.93(13) . . ? 
C5 C4 C3 120.46(14) . . ? 
N1 C5 C4 120.42(14) . . ? 
N2 C6 C7 120.67(14) . . ? 
C6 C7 C8 120.36(14) . . ? 
C7 C8 C9 117.17(14) . . ? 
C7 C8 C3 122.86(13) . . ? 
C9 C8 C3 119.97(14) . . ? 
C10 C9 C8 120.96(15) . . ? 
N2 C10 C9 120.25(14) . . ? 
  
_diffrn_measured_fraction_theta_max    0.992 
_diffrn_reflns_theta_full              27.50 
_diffrn_measured_fraction_theta_full   0.992
 
_refine_diff_density_max    0.36
_refine_diff_density_min   -0.24 
_refine_diff_density_rms    0.05

#===END of CIF

  
data_compound_6_zrf6cu 
  
_audit_creation_method       'enCIFer editing of SHELXL97 CIF output'
_chemical_name_systematic 
; 
 ? 
; 
_chemical_name_common             ? 
_chemical_melting_point           ? 
_chemical_formula_moiety         'C22 H24 Cu N4 O6, 2(F5 Zr)'  
_chemical_formula_sum            'C22 H24 Cu F10 N4 O6 Zr2' 
_chemical_formula_weight          876.43 
  
loop_ 
 _atom_type_symbol 
 _atom_type_description 
 _atom_type_scat_dispersion_real 
 _atom_type_scat_dispersion_imag 
 _atom_type_scat_source 
 'C'  'C'   0.0033   0.0016 
 'International Tables Vol C Tables 4.2.6.8 and 6.1.1.4' 
 'Cu'  'Cu'   0.3201   1.2651 
 'International Tables Vol C Tables 4.2.6.8 and 6.1.1.4' 
 'F'  'F'   0.0171   0.0103 
 'International Tables Vol C Tables 4.2.6.8 and 6.1.1.4' 
 'N'  'N'   0.0061   0.0033 
 'International Tables Vol C Tables 4.2.6.8 and 6.1.1.4' 
 'O'  'O'   0.0106   0.0060 
 'International Tables Vol C Tables 4.2.6.8 and 6.1.1.4' 
 'Zr'  'Zr'  -2.9673   0.5597 
 'International Tables Vol C Tables 4.2.6.8 and 6.1.1.4' 
 'H'  'H'   0.0000   0.0000 
 'International Tables Vol C Tables 4.2.6.8 and 6.1.1.4' 
  
_symmetry_cell_setting            Monoclinic 
_symmetry_space_group_name_H-M    C2/c 
  
loop_ 
 _symmetry_equiv_pos_as_xyz 
 'x, y, z' 
 '-x, y, -z+1/2' 
 'x+1/2, y+1/2, z' 
 '-x+1/2, y+1/2, -z+1/2' 
 '-x, -y, -z' 
 'x, -y, z-1/2' 
 '-x+1/2, -y+1/2, -z' 
 'x+1/2, -y+1/2, z-1/2' 
  
_cell_length_a                    19.569(2) 
_cell_length_b                    13.306(2) 
_cell_length_c                    13.617(2) 
_cell_angle_alpha                 90.00 
_cell_angle_beta                  128.647(2) 
_cell_angle_gamma                 90.00 
_cell_volume                      2769(1) 
_cell_formula_units_Z             4 
_cell_measurement_temperature     150(2) 
_cell_measurement_reflns_used     2502 
_cell_measurement_theta_min       2.65 
_cell_measurement_theta_max       27.55 
  
_exptl_crystal_description        NEEDLE 
_exptl_crystal_colour             ORANGE 
_exptl_crystal_size_max           0.253 
_exptl_crystal_size_mid           0.099 
_exptl_crystal_size_min           0.042 
_exptl_crystal_density_meas       ? 
_exptl_crystal_density_diffrn     2.102 
_exptl_crystal_density_method     'not measured' 
_exptl_crystal_F_000              1724 
_exptl_absorpt_coefficient_mu     1.614 
_exptl_absorpt_correction_type    multi-scan 
_exptl_absorpt_correction_T_min   0.795 
_exptl_absorpt_correction_T_max   1.000 
_exptl_absorpt_process_details   '(SADABS version 2.10; Bruker, 2003)'
  
_exptl_special_details 
; 
 ? 
; 
  
_diffrn_ambient_temperature       150(2) 
_diffrn_radiation_wavelength      0.71073 
_diffrn_radiation_type            MoK\a 
_diffrn_radiation_source         'normal-focus sealed tube' 
_diffrn_radiation_monochromator   graphite 
_diffrn_measurement_device_type   'Bruker SMART APEX CCD area detector' 
_diffrn_measurement_method        \w
_diffrn_detector_area_resol_mean  ? 
_diffrn_standards_number          0 
_diffrn_standards_interval_count  . 
_diffrn_standards_interval_time   ? 
_diffrn_standards_decay_%         0 
_diffrn_reflns_number             8568 
_diffrn_reflns_av_R_equivalents   0.025
_diffrn_reflns_av_sigmaI/netI     0.063 
_diffrn_reflns_limit_h_min       -25 
_diffrn_reflns_limit_h_max        25 
_diffrn_reflns_limit_k_min       -17 
_diffrn_reflns_limit_k_max        9 
_diffrn_reflns_limit_l_min       -17 
_diffrn_reflns_limit_l_max        16
_diffrn_reflns_theta_min          2.03 
_diffrn_reflns_theta_max          27.53 
_reflns_number_total              3155 
_reflns_number_gt                 2512 
_reflns_threshold_expression      >2\s(I) 
  
_computing_data_collection        'Bruker SMART version 5.625 (Bruker, 2001)' 
_computing_cell_refinement        'Bruker SAINT version 6.36A (Bruker, 2000)' 
_computing_data_reduction         'Bruker SAINT; SHELXTL (Sheldrick, 2008)' 
_computing_structure_solution     'SHELXS97 (Sheldrick, 2008)' 
_computing_structure_refinement   'SHELXL97 (Sheldrick, 2008)' 
_computing_molecular_graphics     'Bruker SHELXTL'
_computing_publication_material 'enCIFer(Allen et al.,2004);PLATON(Spek,2003)' 
  
_refine_special_details 
; 
 ? 
; 
  
_refine_ls_structure_factor_coef  Fsqd 
_refine_ls_matrix_type            full 
_refine_ls_weighting_scheme       calc 
_refine_ls_weighting_details 
 'calc w=1/[\s^2^(Fo^2^)+(0.0225P)^2^] where P=(Fo^2^+2Fc^2^)/3' 
_atom_sites_solution_primary      direct 
_atom_sites_solution_secondary    difmap 
_atom_sites_solution_hydrogens    geom 
_refine_ls_hydrogen_treatment     constr
_refine_ls_extinction_method      none 
_refine_ls_extinction_coef        ? 
_refine_ls_number_reflns          3155 
_refine_ls_number_parameters      213 
_refine_ls_number_restraints      1 
_refine_ls_R_factor_all           0.0422 
_refine_ls_R_factor_gt            0.0315 
_refine_ls_wR_factor_ref          0.0687 
_refine_ls_wR_factor_gt           0.0661 
_refine_ls_goodness_of_fit_ref    0.93 
_refine_ls_restrained_S_all       0.93
_refine_ls_shift/su_max           0.004 
_refine_ls_shift/su_mean          0.000 
  
loop_ 
 _atom_site_label 
 _atom_site_type_symbol 
 _atom_site_fract_x 
 _atom_site_fract_y 
 _atom_site_fract_z 
 _atom_site_U_iso_or_equiv 
 _atom_site_adp_type 
 _atom_site_occupancy 
 _atom_site_symmetry_multiplicity 
 _atom_site_calc_flag 
 _atom_site_refinement_flags 
 _atom_site_disorder_assembly 
 _atom_site_disorder_group 
Cu1 Cu 0.5000 0.5000 0.5000 0.01775(13) Uani 1 2 d S . . 
O1 O 0.61778(12) 0.54940(17) 0.62603(18) 0.0223(5) Uani 1 1 d . . . 
O2 O 0.51203(12) 0.52641(17) 0.37203(18) 0.0214(5) Uani 1 1 d . . . 
N1 N 0.65065(15) 0.59852(19) 0.7318(2) 0.0169(5) Uani 1 1 d . . . 
N2 N 0.57784(15) 0.58883(19) 0.4075(2) 0.0188(5) Uani 1 1 d . . . 
C1 C 0.60080(19) 0.6587(2) 0.7431(3) 0.0203(7) Uani 1 1 d . . . 
H1A H 0.5426 0.6600 0.6770 0.024 Uiso 1 1 calc R . .  
C2 C 0.63876(17) 0.7181(2) 0.8481(3) 0.0194(6) Uani 1 1 d . . . 
H2A H 0.6037 0.7600 0.8546 0.023 Uiso 1 1 calc R . . 
C3 C 0.72913(17) 0.7163(2) 0.9452(2) 0.0154(6) Uani 1 1 d . . . 
C4 C 0.77674(18) 0.6480(2) 0.9315(3) 0.0196(6) Uani 1 1 d . . . 
H4A H 0.8366 0.6413 0.9957 0.024 Uiso 1 1 calc R . . 
C5 C 0.73719(18) 0.5905(2) 0.8254(3) 0.0197(6) Uani 1 1 d . . . 
H5A H 0.7703 0.5458 0.8181 0.024 Uiso 1 1 calc R . . 
C6 C 0.65681(19) 0.5494(2) 0.4566(3) 0.0218(7) Uani 1 1 d . . . 
H6A H 0.6651 0.4802 0.4655 0.026 Uiso 1 1 calc R . . 
C7 C 0.72484(19) 0.6119(2) 0.4934(3) 0.0211(7) Uani 1 1 d . . . 
H7A H 0.7791 0.5844 0.5267 0.025 Uiso 1 1 calc R . . 
C8 C 0.71406(17) 0.7154(2) 0.4819(2) 0.0180(6) Uani 1 1 d . . . 
C9 C 0.63162(19) 0.7524(2) 0.4337(3) 0.0259(7) Uani 1 1 d . . . 
H9A H 0.6216 0.8214 0.4258 0.031 Uiso 1 1 calc R . . 
C10 C 0.56560(19) 0.6873(2) 0.3983(3) 0.0250(7) Uani 1 1 d . . . 
H10A H 0.5112 0.7127 0.3671 0.030 Uiso 1 1 calc R . . 
Zr1 Zr 0.460774(17) 0.01272(2) 0.34114(2) 0.01548(9) Uani 1 1 d . . . 
F1 F 0.57210(10) 0.00212(13) 0.34299(14) 0.0231(4) Uani 1 1 d . . . 
F2 F 0.42840(10) 0.01510(13) 0.46503(14) 0.0216(4) Uani 1 1 d . . . 
F3 F 0.44655(11) -0.13362(14) 0.33022(17) 0.0303(4) Uani 1 1 d . . . 
F4 F 0.33735(10) 0.04911(15) 0.22783(15) 0.0281(4) Uani 1 1 d . . . 
F5 F 0.50098(11) 0.15494(13) 0.38198(16) 0.0260(4) Uani 1 1 d . . . 
O1S O 0.58135(15) 0.32453(18) 0.5488(2) 0.0328(6) Uani 1 1 d D . . 
H1S H 0.568(2) 0.2638(10) 0.534(3) 0.039 Uiso 1 1 d D . . 
C1S C 0.6589(2) 0.3215(3) 0.6781(3) 0.0301(8) Uani 1 1 d . . . 
H1SA H 0.7076 0.3471 0.6849 0.045 Uiso 1 1 calc R . . 
H1SB H 0.6706 0.2534 0.7078 0.045 Uiso 1 1 calc R . . 
H1SC H 0.6504 0.3620 0.7280 0.045 Uiso 1 1 calc R . . 
  
loop_ 
 _atom_site_aniso_label 
 _atom_site_aniso_U_11 
 _atom_site_aniso_U_22 
 _atom_site_aniso_U_33 
 _atom_site_aniso_U_23 
 _atom_site_aniso_U_13 
 _atom_site_aniso_U_12 
Cu1 0.0165(2) 0.0233(3) 0.0128(2) -0.0046(2) 0.0089(2) -0.0080(2) 
O1 0.0162(10) 0.0345(13) 0.0152(10) -0.0119(10) 0.0093(9) -0.0093(10) 
O2 0.0190(10) 0.0287(13) 0.0181(10) -0.0037(10) 0.0123(9) -0.0090(10) 
N1 0.0172(12) 0.0182(14) 0.0152(12) -0.0051(10) 0.0100(11) -0.0057(10) 
N2 0.0168(12) 0.0254(15) 0.0149(12) -0.0003(11) 0.0102(11) -0.0037(11) 
C1 0.0140(15) 0.0230(17) 0.0180(15) -0.0013(13) 0.0070(14) 0.0007(13) 
C2 0.0158(14) 0.0194(16) 0.0200(15) -0.0024(13) 0.0097(13) 0.0019(13) 
C3 0.0169(14) 0.0149(15) 0.0134(13) 0.0005(12) 0.0090(13) -0.0017(12) 
C4 0.0121(14) 0.0228(17) 0.0185(15) -0.0018(13) 0.0069(13) -0.0015(12) 
C5 0.0145(14) 0.0224(17) 0.0206(15) -0.0023(13) 0.0102(13) 0.0017(13) 
C6 0.0249(16) 0.0190(16) 0.0257(16) -0.0016(14) 0.0179(14) -0.0009(14) 
C7 0.0184(15) 0.0240(18) 0.0243(16) 0.0028(14) 0.0151(14) 0.0024(13) 
C8 0.0158(14) 0.0240(18) 0.0160(14) 0.0027(13) 0.0108(13) 0.0008(13) 
C9 0.0234(16) 0.0186(17) 0.0356(18) 0.0072(15) 0.0183(15) 0.0043(14) 
C10 0.0175(15) 0.0270(18) 0.0311(17) 0.0052(15) 0.0155(15) 0.0024(14) 
Zr1 0.01245(14) 0.01800(16) 0.01526(14) 0.00011(12) 0.00830(12) -0.00020(12) 
F1 0.0131(8) 0.0361(11) 0.0180(8) -0.0005(8) 0.0088(7) 0.0000(8) 
F2 0.0152(8) 0.0311(11) 0.0188(8) 0.0031(8) 0.0108(7) 0.0031(8) 
F3 0.0330(10) 0.0217(10) 0.0359(11) -0.0030(9) 0.0214(9) -0.0028(9) 
F4 0.0167(9) 0.0441(12) 0.0212(9) 0.0019(9) 0.0106(8) 0.0059(9) 
F5 0.0248(9) 0.0200(10) 0.0288(10) 0.0029(8) 0.0147(9) -0.0004(8) 
O1S 0.0342(13) 0.0295(14) 0.0256(12) -0.0056(12) 0.0143(11) -0.0063(12) 
C1S 0.0289(18) 0.031(2) 0.0273(17) 0.0032(16) 0.0160(16) 0.0046(16) 
  
_geom_special_details 
; 
 All esds (except the esd in the dihedral angle between two l.s. planes) 
 are estimated using the full covariance matrix.  The cell esds are taken 
 into account individually in the estimation of esds in distances, angles 
 and torsion angles; correlations between esds in cell parameters are only 
 used when they are defined by crystal symmetry.  An approximate (isotropic) 
 treatment of cell esds is used for estimating esds involving l.s. planes. 
; 
  
loop_ 
 _geom_bond_atom_site_label_1 
 _geom_bond_atom_site_label_2 
 _geom_bond_distance 
 _geom_bond_site_symmetry_2 
 _geom_bond_publ_flag 
Cu1 O1 1.9362(19) . ? 
Cu1 O2 1.9308(18) . ? 
Cu1 O1S 2.666(3) . ? 
O1 N1 1.326(3) . ? 
O2 N2 1.343(3) . ? 
N1 C1 1.344(4) . ? 
N1 C5 1.345(3) . ? 
N2 C10 1.323(4) . ? 
N2 C6 1.349(4) . ? 
C1 C2 1.375(4) . ? 
C1 H1A 0.9100 . ? 
C2 C3 1.398(4) . ? 
C2 H2A 0.9300 . ? 
C3 C4 1.395(4) . ? 
C3 C3 1.476(5) 7_667 ? 
C4 C5 1.368(4) . ? 
C4 H4A 0.9300 . ? 
C5 H5A 0.9300 . ? 
C6 C7 1.372(4) . ? 
C6 H6A 0.9300 . ? 
C7 C8 1.387(4) . ? 
C7 H7A 0.9300 . ? 
C8 C9 1.398(4) . ? 
C8 C8 1.484(5) 7_666 ? 
C9 C10 1.369(4) . ? 
C9 H9A 0.9300 . ? 
C10 H10A 0.9300 . ? 
Zr1 F1 2.1674(15) . ? 
Zr1 F1 2.1692(16) 2_655 ? 
Zr1 F2 2.1409(15) . ? 
Zr1 F2 2.1581(16) 5_656 ? 
Zr1 F3 1.9594(18) . ? 
Zr1 F4 1.9478(16) . ? 
Zr1 F5 1.9908(18) . ? 
Zr1 Zr1 3.5908(8) 5_656 ? 
Zr1 Zr1 3.6437(6) 2_655 ? 
O1S C1S 1.438(4) . ? 
O1S H1S 0.836(10) . ? 
C1S H1SA 0.9600 . ? 
C1S H1SB 0.9600 . ? 
C1S H1SC 0.9600 . ? 
  
loop_ 
 _geom_angle_atom_site_label_1 
 _geom_angle_atom_site_label_2 
 _geom_angle_atom_site_label_3 
 _geom_angle 
 _geom_angle_site_symmetry_1 
 _geom_angle_site_symmetry_3 
 _geom_angle_publ_flag 
O1 Cu1 O2  89.40(8) . . ? 
O1 Cu1 O1S 83.19(8) . . ? 
O2 Cu1 O1S 89.65(8) . . ? 
N1 O1 Cu1 129.17(16) . . ? 
N2 O2 Cu1 114.72(15) . . ? 
O1 N1 C1 121.6(2) . . ? 
O1 N1 C5 117.4(2) . . ? 
C1 N1 C5 120.8(2) . . ? 
C10 N2 O2 120.1(2) . . ? 
C10 N2 C6 121.0(3) . . ? 
O2 N2 C6 118.8(2) . . ? 
N1 C1 C2 120.1(3) . . ? 
N1 C1 H1A 116  . . ? 
C2 C1 H1A 123  . . ? 
C1 C2 C3 121.1(3) . . ? 
C1 C2 H2A 119.5 . . ? 
C3 C2 H2A 119.5 . . ? 
C4 C3 C2 116.1(2) . . ? 
C4 C3 C3 122.5(3) . 7_667 ? 
C2 C3 C3 121.4(3) . 7_667 ? 
C5 C4 C3 121.3(3) . . ? 
C5 C4 H4A 119.3 . . ? 
C3 C4 H4A 119.3 . . ? 
N1 C5 C4 120.3(3) . . ? 
N1 C5 H5A 119.9 . . ? 
C4 C5 H5A 119.9 . . ? 
N2 C6 C7 119.7(3) . . ? 
N2 C6 H6A 120.1 . . ? 
C7 C6 H6A 120.1 . . ? 
C6 C7 C8 121.1(3) . . ? 
C6 C7 H7A 119.5 . . ? 
C8 C7 H7A 119.5 . . ? 
C7 C8 C9 116.9(3) . . ? 
C7 C8 C8 122.2(3) . 7_666 ? 
C9 C8 C8 120.9(3) . 7_666 ? 
C10 C9 C8 120.0(3) . . ? 
C10 C9 H9A 120.0 . . ? 
C8 C9 H9A 120.0 . . ? 
N2 C10 C9 121.2(3) . . ? 
N2 C10 H10A 119.4 . . ? 
C9 C10 H10A 119.4 . . ? 
F4 Zr1 F3 98.04(8) . . ? 
F4 Zr1 F5 93.62(8) . . ? 
F3 Zr1 F5 168.09(7) . . ? 
F4 Zr1 F2 77.86(6) . . ? 
F3 Zr1 F2 88.66(7) . . ? 
F5 Zr1 F2 91.46(7) . . ? 
F4 Zr1 F2 144.42(6) . 5_656 ? 
F3 Zr1 F2 84.77(7) . 5_656 ? 
F5 Zr1 F2 84.34(7) . 5_656 ? 
F2 Zr1 F2 66.71(7) . 5_656 ? 
F4 Zr1 F1 139.95(6) . . ? 
F3 Zr1 F1 91.74(7) . . ? 
F5 Zr1 F1 80.77(7) . . ? 
F2 Zr1 F1 141.42(6) . . ? 
F2 Zr1 F1 74.91(6) 5_656 . ? 
F4 Zr1 F1 76.98(6) . 2_655 ? 
F3 Zr1 F1 85.54(7) . 2_655 ? 
F5 Zr1 F1 99.49(7) . 2_655 ? 
F2 Zr1 F1 153.09(6) . 2_655 ? 
F2 Zr1 F1 138.47(6) 5_656 2_655 ? 
Zr1 Zr1 Zr1 140.874(17) 5_656 2_655 ? 
Zr1 F1 Zr1 114.33(7) . 2_655 ? 
Zr1 F2 Zr1 113.29(7) . 5_656 ? 
C1S O1S Cu1 109.82(19) . . ? 
C1S O1S H1S 102(2) . . ? 
Cu1 O1S H1S 137(2) . . ? 
O1S C1S H1SA 109.5 . . ? 
O1S C1S H1SB 109.5 . . ? 
H1SA C1S H1SB 109.5 . . ? 
O1S C1S H1SC 109.5 . . ? 
H1SA C1S H1SC 109.5 . . ? 
H1SB C1S H1SC 109.5 . . ? 
  
_diffrn_measured_fraction_theta_max    0.987 
_diffrn_reflns_theta_full              27.50 
_diffrn_measured_fraction_theta_full   0.988
 
_refine_diff_density_max    0.81 
_refine_diff_density_min   -0.58 
_refine_diff_density_rms    0.10

#===END of CIF

  
data_compound_7_nopfcu 
  
_audit_creation_method       'enCIFer editing of SHELXL97 CIF output'
_chemical_name_systematic 
; 
 ? 
; 
_chemical_name_common             ? 
_chemical_melting_point           ? 
_chemical_formula_moiety         'C40 H32 CU N8 O8, 2(P F6)' 
_chemical_formula_sum            'C40 H32 Cu F12 N8 O8 P2' 
_chemical_formula_weight          1106.22 
  
loop_ 
 _atom_type_symbol 
 _atom_type_description 
 _atom_type_scat_dispersion_real 
 _atom_type_scat_dispersion_imag 
 _atom_type_scat_source 
 'C'  'C'   0.0033   0.0016 
 'International Tables Vol C Tables 4.2.6.8 and 6.1.1.4' 
 'H'  'H'   0.0000   0.0000 
 'International Tables Vol C Tables 4.2.6.8 and 6.1.1.4' 
 'Cu'  'Cu'   0.3201   1.2651 
 'International Tables Vol C Tables 4.2.6.8 and 6.1.1.4' 
 'F'  'F'   0.0171   0.0103 
 'International Tables Vol C Tables 4.2.6.8 and 6.1.1.4' 
 'N'  'N'   0.0061   0.0033 
 'International Tables Vol C Tables 4.2.6.8 and 6.1.1.4' 
 'O'  'O'   0.0106   0.0060 
 'International Tables Vol C Tables 4.2.6.8 and 6.1.1.4' 
 'P'  'P'   0.1023   0.0942 
 'International Tables Vol C Tables 4.2.6.8 and 6.1.1.4' 
  
_symmetry_cell_setting            Triclinic 
_symmetry_space_group_name_H-M    P-1 
  
loop_ 
 _symmetry_equiv_pos_as_xyz 
 'x, y, z' 
 '-x, -y, -z' 
  
_cell_length_a                    8.719(1) 
_cell_length_b                    11.616(2) 
_cell_length_c                    12.137(2) 
_cell_angle_alpha                 62.571(2) 
_cell_angle_beta                  76.607(2) 
_cell_angle_gamma                 76.515(2) 
_cell_volume                      1049.9(4) 
_cell_formula_units_Z             1 
_cell_measurement_temperature     150(2) 
_cell_measurement_reflns_used     2552 
_cell_measurement_theta_min       2.43 
_cell_measurement_theta_max       27.24 
  
_exptl_crystal_description        TABLET 
_exptl_crystal_colour             YELLOW 
_exptl_crystal_size_max           0.232 
_exptl_crystal_size_mid           0.130 
_exptl_crystal_size_min           0.028 
_exptl_crystal_density_meas       ? 
_exptl_crystal_density_diffrn     1.750 
_exptl_crystal_density_method     'not measured' 
_exptl_crystal_F_000              559 
_exptl_absorpt_coefficient_mu     0.716 
_exptl_absorpt_correction_type   'MULTI-SCAN' 
_exptl_absorpt_correction_T_min   0.735 
_exptl_absorpt_correction_T_max   1.000 
_exptl_absorpt_process_details    '(SADABS version 2.10; Sheldrick, 2003)' 
  
_exptl_special_details 
; 
 ? 
; 
  
_diffrn_ambient_temperature       150(2) 
_diffrn_radiation_wavelength      0.71073 
_diffrn_radiation_type            MoK\a 
_diffrn_radiation_source         'normal-focus sealed tube' 
_diffrn_radiation_monochromator   graphite 
_diffrn_measurement_device_type  'Bruker SMART APEX CCD area detector' 
_diffrn_measurement_method        \w
_diffrn_detector_area_resol_mean  ? 
_diffrn_standards_number          0 
_diffrn_standards_interval_count  . 
_diffrn_standards_interval_time   ? 
_diffrn_standards_decay_%         0 
_diffrn_reflns_number             8710 
_diffrn_reflns_av_R_equivalents   0.022 
_diffrn_reflns_av_sigmaI/netI     0.039 
_diffrn_reflns_limit_h_min       -11 
_diffrn_reflns_limit_h_max        11 
_diffrn_reflns_limit_k_min       -15 
_diffrn_reflns_limit_k_max        15 
_diffrn_reflns_limit_l_min       -15 
_diffrn_reflns_limit_l_max        15 
_diffrn_reflns_theta_min          2.43 
_diffrn_reflns_theta_max          27.50 
_reflns_number_total              4665 
_reflns_number_gt                 3784 
_reflns_threshold_expression      >2\s(I) 
  
_computing_data_collection        'Bruker SMART version 5.625 (Bruker, 2001)' 
_computing_cell_refinement        'Bruker SAINT version 6.36A (Bruker, 2000)' 
_computing_data_reduction         'Bruker SAINT; SHELXTL (Sheldrick, 2008)' 
_computing_structure_solution     'SHELXS97 (Sheldrick, 2008)' 
_computing_structure_refinement   'SHELXL97 (Sheldrick, 2008)' 
_computing_molecular_graphics     ? 
_computing_publication_material 'enCIFer(Allen et al.,2004);PLATON(Spek,2003)' 
  
_refine_special_details 
; 
  ?
; 
  
_refine_ls_structure_factor_coef  Fsqd 
_refine_ls_matrix_type            full 
_refine_ls_weighting_scheme       calc 
_refine_ls_weighting_details 
 'calc w=1/[\s^2^(Fo^2^)+(0.056P)^2^+0.813P] where P=(Fo^2^+2Fc^2^)/3' 
_atom_sites_solution_primary      heavy 
_atom_sites_solution_secondary    difmap 
_atom_sites_solution_hydrogens    geom 
_refine_ls_hydrogen_treatment     constr 
_refine_ls_extinction_method      none 
_refine_ls_extinction_coef        ? 
_refine_ls_number_reflns          4665 
_refine_ls_number_parameters      322 
_refine_ls_number_restraints      0 
_refine_ls_R_factor_all           0.0619 
_refine_ls_R_factor_gt            0.0464 
_refine_ls_wR_factor_ref          0.115 
_refine_ls_wR_factor_gt           0.108 
_refine_ls_goodness_of_fit_ref    1.02
_refine_ls_restrained_S_all       1.02
_refine_ls_shift/su_max           0.001 
_refine_ls_shift/su_mean          0.000 
  
loop_ 
 _atom_site_label 
 _atom_site_type_symbol 
 _atom_site_fract_x 
 _atom_site_fract_y 
 _atom_site_fract_z 
 _atom_site_U_iso_or_equiv 
 _atom_site_adp_type 
 _atom_site_occupancy 
 _atom_site_symmetry_multiplicity 
 _atom_site_calc_flag 
 _atom_site_refinement_flags 
 _atom_site_disorder_assembly 
 _atom_site_disorder_group 
Cu1 Cu 0.5000 0.5000 0.0000 0.01995(13) Uani 1 2 d S . . 
O1 O 0.2759(2) 0.52164(17) -0.09040(17) 0.0282(4) Uani 1 1 d . . . 
O2 O -0.3868(3) -0.1373(2) 0.1311(3) 0.0519(7) Uani 1 1 d . . . 
O3 O 0.6562(2) 0.50896(18) -0.14741(16) 0.0259(4) Uani 1 1 d . . . 
O4 O 0.5236(2) 0.30553(16) 0.06059(15) 0.0266(4) Uani 1 1 d . . . 
N1 N 0.1822(3) 0.4340(2) -0.06025(19) 0.0232(4) Uani 1 1 d . . . 
N2 N -0.2957(3) -0.0496(2) 0.0994(2) 0.0350(6) Uani 1 1 d . . . 
N3 N 0.6154(2) 0.5013(2) -0.24346(19) 0.0218(4) Uani 1 1 d . . . 
N4 N 0.5188(3) 0.22182(19) 0.18159(19) 0.0235(5) Uani 1 1 d . . . 
C1 C 0.1418(3) 0.3520(2) 0.0616(2) 0.0251(5) Uani 1 1 d . . . 
H1A H 0.1774 0.3594 0.1243 0.030 Uiso 1 1 calc R . . 
C2 C 0.0486(3) 0.2583(3) 0.0927(2) 0.0262(5) Uani 1 1 d . . . 
H2A H 0.0226 0.2024 0.1768 0.031 Uiso 1 1 calc R . . 
C3 C -0.0084(3) 0.2445(2) 0.0016(2) 0.0241(5) Uani 1 1 d . . . 
C4 C 0.0312(3) 0.3347(3) -0.1225(2) 0.0268(6) Uani 1 1 d . . . 
H4A H -0.0072 0.3320 -0.1866 0.032 Uiso 1 1 calc R . . 
C5 C 0.1257(3) 0.4270(2) -0.1513(2) 0.0264(6) Uani 1 1 d . . . 
H5A H 0.1511 0.4854 -0.2346 0.032 Uiso 1 1 calc R . . 
C6 C -0.2078(3) -0.0587(3) 0.1820(3) 0.0353(7) Uani 1 1 d . . . 
H6A H -0.2111 -0.1295 0.2608 0.042 Uiso 1 1 calc R . . 
C7 C -0.1136(3) 0.0342(3) 0.1521(3) 0.0297(6) Uani 1 1 d . . . 
H7A H -0.0541 0.0253 0.2108 0.036 Uiso 1 1 calc R . . 
C8 C -0.1059(3) 0.1420(2) 0.0347(3) 0.0256(5) Uani 1 1 d . . . 
C9 C -0.1956(3) 0.1469(3) -0.0488(3) 0.0297(6) Uani 1 1 d . . . 
H9A H -0.1922 0.2157 -0.1288 0.036 Uiso 1 1 calc R . . 
C10 C -0.2887(3) 0.0528(3) -0.0161(3) 0.0343(6) Uani 1 1 d . . . 
H10A H -0.3479 0.0591 -0.0738 0.041 Uiso 1 1 calc R . . 
C11 C 0.5352(3) 0.4067(2) -0.2251(2) 0.0242(5) Uani 1 1 d . . . 
H11A H 0.5100 0.3429 -0.1444 0.029 Uiso 1 1 calc R . . 
C12 C 0.4906(3) 0.4041(2) -0.3244(2) 0.0251(5) Uani 1 1 d . . . 
H12A H 0.4354 0.3382 -0.3108 0.030 Uiso 1 1 calc R . . 
C13 C 0.5269(3) 0.4992(2) -0.4462(2) 0.0232(5) Uani 1 1 d . . . 
C14 C 0.6173(4) 0.5906(3) -0.4609(2) 0.0341(7) Uani 1 1 d . . . 
H14A H 0.6485 0.6531 -0.5410 0.041 Uiso 1 1 calc R . . 
C15 C 0.6609(3) 0.5903(3) -0.3596(2) 0.0311(6) Uani 1 1 d . . . 
H15A H 0.7221 0.6517 -0.3711 0.037 Uiso 1 1 calc R . . 
C16 C 0.4238(3) 0.1286(3) 0.2294(2) 0.0294(6) Uani 1 1 d . . . 
H16A H 0.3638 0.1236 0.1780 0.035 Uiso 1 1 calc R . . 
C17 C 0.4149(3) 0.0407(3) 0.3541(3) 0.0316(6) Uani 1 1 d . . . 
H17A H 0.3480 -0.0227 0.3864 0.038 Uiso 1 1 calc R . . 
C18 C 0.5051(3) 0.0456(2) 0.4325(2) 0.0249(5) Uani 1 1 d . . . 
C19 C 0.6067(4) 0.1390(3) 0.3774(3) 0.0307(6) Uani 1 1 d . . . 
H19A H 0.6724 0.1431 0.4255 0.037 Uiso 1 1 calc R . . 
C20 C 0.6123(3) 0.2261(3) 0.2528(2) 0.0296(6) Uani 1 1 d . . . 
H20A H 0.6813 0.2882 0.2177 0.036 Uiso 1 1 calc R . . 
P1 P 0.94200(10) 0.23734(8) 0.51662(8) 0.0376(2) Uani 1 1 d . . . 
F1 F 1.1238(2) 0.1928(2) 0.5384(2) 0.0656(7) Uani 1 1 d . . . 
F2 F 0.7600(3) 0.2804(2) 0.4958(3) 0.0713(7) Uani 1 1 d . . . 
F3 F 0.9007(3) 0.2611(3) 0.6396(2) 0.0776(7) Uani 1 1 d . . . 
F4 F 0.9697(3) 0.3851(2) 0.4366(2) 0.0798(8) Uani 1 1 d . . . 
F5 F 0.9830(4) 0.2145(3) 0.3951(3) 0.1025(11) Uani 1 1 d . . . 
F6 F 0.9120(3) 0.0902(2) 0.6002(3) 0.0764(8) Uani 1 1 d . . . 
  
loop_ 
 _atom_site_aniso_label 
 _atom_site_aniso_U_11 
 _atom_site_aniso_U_22 
 _atom_site_aniso_U_33 
 _atom_site_aniso_U_23 
 _atom_site_aniso_U_13 
 _atom_site_aniso_U_12 
Cu1 0.0265(2) 0.0167(2) 0.0144(2) -0.00338(16) -0.00347(16) -0.00580(17) 
O1 0.0318(10) 0.0205(9) 0.0315(10) -0.0046(8) -0.0102(8) -0.0113(8) 
O2 0.0391(12) 0.0278(11) 0.0797(18) -0.0049(11) -0.0186(12) -0.0182(10) 
O3 0.0299(10) 0.0335(10) 0.0179(8) -0.0108(8) -0.0041(7) -0.0111(8) 
O4 0.0410(11) 0.0178(9) 0.0154(8) -0.0014(7) -0.0054(7) -0.0052(8) 
N1 0.0254(11) 0.0177(10) 0.0248(11) -0.0053(8) -0.0071(9) -0.0048(8) 
N2 0.0256(12) 0.0227(12) 0.0517(16) -0.0093(11) -0.0082(11) -0.0069(10) 
N3 0.0243(11) 0.0246(11) 0.0179(10) -0.0090(8) -0.0038(8) -0.0056(9) 
N4 0.0308(12) 0.0168(10) 0.0174(10) -0.0017(8) -0.0057(8) -0.0034(9) 
C1 0.0282(13) 0.0253(13) 0.0217(12) -0.0082(10) -0.0063(10) -0.0052(11) 
C2 0.0265(13) 0.0257(13) 0.0225(12) -0.0057(10) -0.0024(10) -0.0080(11) 
C3 0.0218(12) 0.0219(12) 0.0267(13) -0.0081(10) -0.0049(10) -0.0033(10) 
C4 0.0279(13) 0.0252(13) 0.0276(13) -0.0081(11) -0.0095(11) -0.0060(11) 
C5 0.0295(14) 0.0224(13) 0.0227(12) -0.0027(10) -0.0085(10) -0.0059(11) 
C6 0.0310(15) 0.0255(14) 0.0399(16) -0.0041(12) -0.0066(13) -0.0070(12) 
C7 0.0262(13) 0.0256(13) 0.0333(15) -0.0071(11) -0.0065(11) -0.0059(11) 
C8 0.0207(12) 0.0214(12) 0.0328(14) -0.0095(11) -0.0051(10) -0.0029(10) 
C9 0.0257(13) 0.0236(13) 0.0367(15) -0.0073(11) -0.0093(11) -0.0052(11) 
C10 0.0297(14) 0.0284(14) 0.0456(17) -0.0129(13) -0.0121(13) -0.0056(12) 
C11 0.0315(14) 0.0204(12) 0.0181(12) -0.0047(10) -0.0034(10) -0.0072(10) 
C12 0.0339(14) 0.0207(12) 0.0218(12) -0.0075(10) -0.0046(10) -0.0088(11) 
C13 0.0284(13) 0.0237(13) 0.0183(12) -0.0087(10) -0.0040(10) -0.0049(10) 
C14 0.0486(18) 0.0368(16) 0.0178(12) -0.0066(11) 0.0004(12) -0.0238(14) 
C15 0.0382(15) 0.0372(15) 0.0208(13) -0.0091(11) 0.0008(11) -0.0230(13) 
C16 0.0326(14) 0.0279(14) 0.0244(13) -0.0025(11) -0.0108(11) -0.0106(12) 
C17 0.0343(15) 0.0267(14) 0.0280(14) 0.0006(11) -0.0107(11) -0.0143(12) 
C18 0.0264(13) 0.0200(12) 0.0231(13) -0.0025(10) -0.0068(10) -0.0051(10) 
C19 0.0406(16) 0.0258(14) 0.0251(13) -0.0035(11) -0.0115(12) -0.0133(12) 
C20 0.0371(15) 0.0221(13) 0.0263(13) -0.0023(11) -0.0072(11) -0.0134(11) 
P1 0.0327(4) 0.0438(5) 0.0371(4) -0.0145(4) -0.0108(3) -0.0077(4) 
F1 0.0356(11) 0.0729(15) 0.0570(13) 0.0045(11) -0.0131(9) -0.0151(10) 
F2 0.0420(12) 0.0884(17) 0.116(2) -0.0694(16) -0.0376(13) 0.0117(11) 
F3 0.0886(19) 0.104(2) 0.0582(14) -0.0479(15) -0.0169(13) -0.0124(16) 
F4 0.0850(18) 0.0536(14) 0.0774(17) 0.0077(12) -0.0394(14) -0.0183(13) 
F5 0.107(2) 0.141(3) 0.0673(17) -0.0719(18) -0.0346(16) 0.0487(19) 
F6 0.0657(15) 0.0547(14) 0.104(2) -0.0168(13) -0.0217(14) -0.0290(12) 
  
_geom_special_details 
; 
 All esds (except the esd in the dihedral angle between two l.s. planes) 
 are estimated using the full covariance matrix.  The cell esds are taken 
 into account individually in the estimation of esds in distances, angles 
 and torsion angles; correlations between esds in cell parameters are only 
 used when they are defined by crystal symmetry.  An approximate (isotropic) 
 treatment of cell esds is used for estimating esds involving l.s. planes. 
; 
  
loop_ 
 _geom_bond_atom_site_label_1 
 _geom_bond_atom_site_label_2 
 _geom_bond_distance 
 _geom_bond_site_symmetry_2 
 _geom_bond_publ_flag 
Cu1 O1 2.3657(18) . ? 
Cu1 O3 1.9577(17) . ? 
Cu1 O4 2.0022(17) . ? 
O1 N1 1.320(3) . ? 
O2 N2 1.301(3) . ? 
O3 N3 1.340(3) . ? 
O4 N4 1.334(2) . ? 
N1 C5 1.351(3) . ? 
N1 C1 1.355(3) . ? 
N2 C6 1.350(4) . ? 
N2 C10 1.356(4) . ? 
N3 C15 1.343(3) . ? 
N3 C11 1.343(3) . ? 
N4 C20 1.341(3) . ? 
N4 C16 1.346(3) . ? 
C1 C2 1.372(4) . ? 
C1 H1A 0.9300 . ? 
C2 C3 1.396(4) . ? 
C2 H2A 0.9300 . ? 
C3 C4 1.400(4) . ? 
C3 C8 1.475(3) . ? 
C4 C5 1.372(4) . ? 
C4 H4A 0.9300 . ? 
C5 H5A 0.9300 . ? 
C6 C7 1.374(4) . ? 
C6 H6A 0.9300 . ? 
C7 C8 1.398(4) . ? 
C7 H7A 0.9300 . ? 
C8 C9 1.392(4) . ? 
C9 C10 1.370(4) . ? 
C9 H9A 0.9300 . ? 
C10 H10A 0.9300 . ? 
C11 C12 1.364(4) . ? 
C11 H11A 0.9300 . ? 
C12 C13 1.395(3) . ? 
C12 H12A 0.9300 . ? 
C13 C14 1.389(4) . ? 
C13 C13 1.479(5) 2_664 ? 
C14 C15 1.367(4) . ? 
C14 H14A 0.9300 . ? 
C15 H15A 0.9300 . ? 
C16 C17 1.378(4) . ? 
C16 H16A 0.9300 . ? 
C17 C18 1.394(4) . ? 
C17 H17A 0.9300 . ? 
C18 C19 1.384(4) . ? 
C18 C18 1.480(5) 2_656 ? 
C19 C20 1.376(4) . ? 
C19 H19A 0.9300 . ? 
C20 H20A 0.9300 . ? 
P1 F5 1.563(2) . ? 
P1 F4 1.580(2) . ? 
P1 F6 1.583(2) . ? 
P1 F3 1.587(2) . ? 
P1 F2 1.591(2) . ? 
P1 F1 1.593(2) . ? 
  
loop_ 
 _geom_angle_atom_site_label_1 
 _geom_angle_atom_site_label_2 
 _geom_angle_atom_site_label_3 
 _geom_angle 
 _geom_angle_site_symmetry_1 
 _geom_angle_site_symmetry_3 
 _geom_angle_publ_flag 
O1 Cu1 O3 95.40(7) . . ? 
O1 Cu1 O4 88.72(7) . . ? 
O3 Cu1 O4 89.11(7) . . ? 
N1 O1 Cu1 128.70(14) . . ? 
N3 O3 Cu1 121.03(14) . . ? 
N4 O4 Cu1 122.85(15) . . ? 
O1 N1 C5 119.8(2) . . ? 
O1 N1 C1 120.2(2) . . ? 
C5 N1 C1 120.0(2) . . ? 
O2 N2 C6 120.1(2) . . ? 
O2 N2 C10 120.8(3) . . ? 
C6 N2 C10 119.1(2) . . ? 
O3 N3 C15 117.4(2) . . ? 
O3 N3 C11 121.6(2) . . ? 
C15 N3 C11 121.0(2) . . ? 
O4 N4 C20 120.8(2) . . ? 
O4 N4 C16 118.6(2) . . ? 
C20 N4 C16 120.5(2) . . ? 
N1 C1 C2 120.2(2) . . ? 
N1 C1 H1A 119.9 . . ? 
C2 C1 H1A 119.9 . . ? 
C1 C2 C3 121.8(2) . . ? 
C1 C2 H2A 119.1 . . ? 
C3 C2 H2A 119.1 . . ? 
C2 C3 C4 115.9(2) . . ? 
C2 C3 C8 121.8(2) . . ? 
C4 C3 C8 122.3(2) . . ? 
C5 C4 C3 121.2(2) . . ? 
C5 C4 H4A 119.4 . . ? 
C3 C4 H4A 119.4 . . ? 
N1 C5 C4 120.8(2) . . ? 
N1 C5 H5A 119.6 . . ? 
C4 C5 H5A 119.6 . . ? 
N2 C6 C7 121.4(3) . . ? 
N2 C6 H6A 119.3 . . ? 
C7 C6 H6A 119.3 . . ? 
C6 C7 C8 120.9(3) . . ? 
C6 C7 H7A 119.6 . . ? 
C8 C7 H7A 119.6 . . ? 
C9 C8 C7 116.1(2) . . ? 
C9 C8 C3 122.0(2) . . ? 
C7 C8 C3 121.9(2) . . ? 
C10 C9 C8 121.6(3) . . ? 
C10 C9 H9A 119.2 . . ? 
C8 C9 H9A 119.2 . . ? 
N2 C10 C9 120.9(3) . . ? 
N2 C10 H10A 119.5 . . ? 
C9 C10 H10A 119.5 . . ? 
N3 C11 C12 120.2(2) . . ? 
N3 C11 H11A 119.9 . . ? 
C12 C11 H11A 119.9 . . ? 
C11 C12 C13 120.8(2) . . ? 
C11 C12 H12A 119.6 . . ? 
C13 C12 H12A 119.6 . . ? 
C14 C13 C12 116.7(2) . . ? 
C14 C13 C13 122.0(3) . 2_664 ? 
C12 C13 C13 121.2(3) . 2_664 ? 
C15 C14 C13 121.0(2) . . ? 
C15 C14 H14A 119.5 . . ? 
C13 C14 H14A 119.5 . . ? 
N3 C15 C14 120.1(2) . . ? 
N3 C15 H15A 120.0 . . ? 
C14 C15 H15A 120.0 . . ? 
N4 C16 C17 120.3(2) . . ? 
N4 C16 H16A 119.8 . . ? 
C17 C16 H16A 119.8 . . ? 
C16 C17 C18 120.8(2) . . ? 
C16 C17 H17A 119.6 . . ? 
C18 C17 H17A 119.6 . . ? 
C19 C18 C17 116.6(2) . . ? 
C19 C18 C18 121.5(3) . 2_656 ? 
C17 C18 C18 121.9(3) . 2_656 ? 
C20 C19 C18 121.2(3) . . ? 
C20 C19 H19A 119.4 . . ? 
C18 C19 H19A 119.4 . . ? 
N4 C20 C19 120.4(2) . . ? 
N4 C20 H20A 119.8 . . ? 
C19 C20 H20A 119.8 . . ? 
F5 P1 F4 90.47(18) . . ? 
F5 P1 F6 91.18(17) . . ? 
F4 P1 F6 178.32(16) . . ? 
F5 P1 F3 179.75(19) . . ? 
F4 P1 F3 89.29(15) . . ? 
F6 P1 F3 89.06(15) . . ? 
F5 P1 F2 89.43(15) . . ? 
F4 P1 F2 89.26(14) . . ? 
F6 P1 F2 90.42(14) . . ? 
F3 P1 F2 90.62(14) . . ? 
F5 P1 F1 90.64(15) . . ? 
F4 P1 F1 91.31(13) . . ? 
F6 P1 F1 89.01(13) . . ? 
F3 P1 F1 89.32(14) . . ? 
F2 P1 F1 179.43(15) . . ? 
  
_diffrn_measured_fraction_theta_max    0.968 
_diffrn_reflns_theta_full              27.50 
_diffrn_measured_fraction_theta_full   0.968
 
_refine_diff_density_max    0.56 
_refine_diff_density_min   -0.30 
_refine_diff_density_rms    0.07

#=== END of CIF
 
  
data_compound_8_cutisb 

_refine_special_details 
; 
 One of the F atom of SbF6 anion was split into two positons
with half occupancy for each of them and were restrained.
; 
  

_audit_creation_method       'enCIFer editing of SHELXL97 CIF output' 
_chemical_name_systematic 
; 
 ? 
; 
_chemical_name_common             ? 
_chemical_melting_point           ? 
_chemical_formula_moiety         'C40 H32 Cu N8 O8, 2(F6 Sb)' 
_chemical_formula_sum            'C40 H32 Cu F12 N8 O8 Sb2' 
_chemical_formula_weight          1287.78 
  
loop_ 
 _atom_type_symbol 
 _atom_type_description 
 _atom_type_scat_dispersion_real 
 _atom_type_scat_dispersion_imag 
 _atom_type_scat_source 
 'C'  'C'   0.0033   0.0016 
 'International Tables Vol C Tables 4.2.6.8 and 6.1.1.4' 
 'H'  'H'   0.0000   0.0000 
 'International Tables Vol C Tables 4.2.6.8 and 6.1.1.4' 
 'N'  'N'   0.0061   0.0033 
 'International Tables Vol C Tables 4.2.6.8 and 6.1.1.4' 
 'O'  'O'   0.0106   0.0060 
 'International Tables Vol C Tables 4.2.6.8 and 6.1.1.4' 
 'F'  'F'   0.0171   0.0103 
 'International Tables Vol C Tables 4.2.6.8 and 6.1.1.4' 
 'Cu'  'Cu'   0.3201   1.2651 
 'International Tables Vol C Tables 4.2.6.8 and 6.1.1.4' 
 'Sb'  'Sb'  -0.5866   1.5461 
 'International Tables Vol C Tables 4.2.6.8 and 6.1.1.4' 
  
_symmetry_cell_setting            Triclinic 
_symmetry_space_group_name_H-M    P-1 
  
loop_ 
 _symmetry_equiv_pos_as_xyz 
 'x, y, z' 
 '-x, -y, -z' 
  
_cell_length_a                    9.039(1) 
_cell_length_b                    11.397(1) 
_cell_length_c                    12.185(2) 
_cell_angle_alpha                 63.270(2) 
_cell_angle_beta                  75.425(2) 
_cell_angle_gamma                 77.368(2) 
_cell_volume                      1076.9(4) 
_cell_formula_units_Z             1 
_cell_measurement_temperature     150(2) 
_cell_measurement_reflns_used     6118 
_cell_measurement_theta_min       2.35 
_cell_measurement_theta_max       27.55 
  
_exptl_crystal_description        PLATE 
_exptl_crystal_colour             YELLOW 
_exptl_crystal_size_max           0.385 
_exptl_crystal_size_mid           0.219 
_exptl_crystal_size_min           0.013 
_exptl_crystal_density_meas       ? 
_exptl_crystal_density_diffrn     1.986 
_exptl_crystal_density_method     'not measured' 
_exptl_crystal_F_000              631 
_exptl_absorpt_coefficient_mu     1.851 
_exptl_absorpt_correction_type    multi-scan 
_exptl_absorpt_correction_T_min   0.7082 
_exptl_absorpt_correction_T_max   1.0000 
_exptl_absorpt_process_details   '(SADABS version 2.10; Sheldrick, 2003)' 
  
_exptl_special_details 
; 
 ? 
; 
  
_diffrn_ambient_temperature       150(2) 
_diffrn_radiation_wavelength      0.71073 
_diffrn_radiation_type            MoK\a 
_diffrn_radiation_source          'normal-focus sealed tube' 
_diffrn_radiation_monochromator   graphite 
_diffrn_measurement_device_type   'Bruker SMART APEX CCD area detector' 
_diffrn_measurement_method        omega 
_diffrn_detector_area_resol_mean  ? 
_diffrn_standards_number          0 
_diffrn_standards_interval_count  . 
_diffrn_standards_interval_time   ? 
_diffrn_standards_decay_%         0 
_diffrn_reflns_number             9500
_diffrn_reflns_av_R_equivalents   0.018
_diffrn_reflns_av_sigmaI/netI     0.025 
_diffrn_reflns_limit_h_min       -11 
_diffrn_reflns_limit_h_max        11 
_diffrn_reflns_limit_k_min       -14 
_diffrn_reflns_limit_k_max        14 
_diffrn_reflns_limit_l_min       -15 
_diffrn_reflns_limit_l_max        15 
_diffrn_reflns_theta_min          2.02 
_diffrn_reflns_theta_max          27.54 
_reflns_number_total              4866 
_reflns_number_gt                 4457 
_reflns_threshold_expression      >2sigma(I) 
  
_computing_data_collection        'Bruker SMART version 5.625 (Bruker, 2001)' 
_computing_cell_refinement        'Bruker SAINT version 6.36A (Bruker, 2000)' 
_computing_data_reduction         'Bruker SAINT; SHELXTL (Sheldrick, 2008)' 
_computing_structure_solution     'SHELXS97 (Sheldrick, 2008)' 
_computing_structure_refinement   'SHELXL97 (Sheldrick, 2008)' 
_computing_molecular_graphics     ? 
_computing_publication_material 'enCIFer(Allen et al.,2004);PLATON(Spek,2003)' 
  
_refine_ls_structure_factor_coef  Fsqd 
_refine_ls_matrix_type            full 
_refine_ls_weighting_scheme       calc 
_refine_ls_weighting_details 
 'calc w=1/[\s^2^(Fo^2^)+(0.044P)^2^+1.134P] where P=(Fo^2^+2Fc^2^)/3' 
_atom_sites_solution_primary      heavy 
_atom_sites_solution_secondary    difmap 
_atom_sites_solution_hydrogens    geom 
_refine_ls_hydrogen_treatment     constr 
_refine_ls_extinction_method      none 
_refine_ls_extinction_coef        ? 
_refine_ls_number_reflns          4866 
_refine_ls_number_parameters      331 
_refine_ls_number_restraints      0 
_refine_ls_R_factor_all           0.0327 
_refine_ls_R_factor_gt            0.0296 
_refine_ls_wR_factor_ref          0.0797 
_refine_ls_wR_factor_gt           0.0770 
_refine_ls_goodness_of_fit_ref    1.03 
_refine_ls_restrained_S_all       1.03 
_refine_ls_shift/su_max           0.004 
_refine_ls_shift/su_mean          0.000 
  
loop_ 
 _atom_site_label 
 _atom_site_type_symbol 
 _atom_site_fract_x 
 _atom_site_fract_y 
 _atom_site_fract_z 
 _atom_site_U_iso_or_equiv 
 _atom_site_adp_type 
 _atom_site_occupancy 
 _atom_site_symmetry_multiplicity 
 _atom_site_calc_flag 
 _atom_site_refinement_flags 
 _atom_site_disorder_assembly 
 _atom_site_disorder_group 
Cu1 Cu 0.0000 -0.5000 0.5000 0.01857(9) Uani 1 2 d S . . 
O1 O 0.2181(2) -0.51934(16) 0.58337(16) 0.0264(4) Uani 1 1 d . . . 
O2 O 0.8856(2) 0.1347(2) 0.3815(2) 0.0475(6) Uani 1 1 d . . . 
O3 O -0.0134(2) -0.30206(16) 0.43689(15) 0.0258(4) Uani 1 1 d . . . 
O4 O 0.15080(19) -0.49562(17) 0.35216(15) 0.0241(3) Uani 1 1 d . . . 
N1 N 0.3129(2) -0.43287(19) 0.55472(18) 0.0221(4) Uani 1 1 d . . . 
N2 N 0.7972(2) 0.0453(2) 0.4094(2) 0.0323(5) Uani 1 1 d . . . 
N3 N -0.0121(2) -0.21913(19) 0.31707(18) 0.0223(4) Uani 1 1 d . . . 
N4 N 0.1092(2) -0.50077(19) 0.25648(17) 0.0201(4) Uani 1 1 d . . . 
C1 C 0.3558(3) -0.3486(2) 0.4344(2) 0.0244(5) Uani 1 1 d . . . 
H1A H 0.3194 -0.3535 0.3701 0.029 Uiso 1 1 calc R . . 
C2 C 0.4520(3) -0.2559(2) 0.4044(2) 0.0251(5) Uani 1 1 d . . . 
H2A H 0.4804 -0.1969 0.3196 0.030 Uiso 1 1 calc R . . 
C3 C 0.5081(3) -0.2476(2) 0.4974(2) 0.0223(4) Uani 1 1 d . . . 
C4 C 0.4669(3) -0.3399(2) 0.6200(2) 0.0246(5) Uani 1 1 d . . . 
H4A H 0.5065 -0.3404 0.6854 0.030 Uiso 1 1 calc R . . 
C5 C 0.3691(3) -0.4303(2) 0.6465(2) 0.0243(5) Uani 1 1 d . . . 
H5A H 0.3407 -0.4916 0.7304 0.029 Uiso 1 1 calc R . . 
C6 C 0.7102(3) 0.0595(3) 0.3276(3) 0.0322(6) Uani 1 1 d . . . 
H6A H 0.7138 0.1354 0.2501 0.039 Uiso 1 1 calc R . . 
C7 C 0.6166(3) -0.0337(2) 0.3544(2) 0.0286(5) Uani 1 1 d . . . 
H7A H 0.5568 -0.0212 0.2953 0.034 Uiso 1 1 calc R . . 
C8 C 0.6083(3) -0.1462(2) 0.4673(2) 0.0232(5) Uani 1 1 d . . . 
C9 C 0.6981(3) -0.1577(2) 0.5497(3) 0.0288(5) Uani 1 1 d . . . 
H9A H 0.6955 -0.2326 0.6279 0.035 Uiso 1 1 calc R . . 
C10 C 0.7909(3) -0.0629(3) 0.5207(3) 0.0329(6) Uani 1 1 d . . . 
H10A H 0.8510 -0.0733 0.5789 0.039 Uiso 1 1 calc R . . 
C11 C 0.0838(3) -0.1254(3) 0.2632(2) 0.0324(6) Uani 1 1 d . . . 
H11A H 0.1480 -0.1193 0.3109 0.039 Uiso 1 1 calc R . . 
C12 C 0.0895(3) -0.0382(3) 0.1394(3) 0.0354(6) Uani 1 1 d . . . 
H12A H 0.1579 0.0273 0.1026 0.043 Uiso 1 1 calc R . . 
C13 C -0.0036(3) -0.0448(2) 0.0674(2) 0.0241(5) Uani 1 1 d . . . 
C14 C -0.1055(3) -0.1393(2) 0.1286(2) 0.0280(5) Uani 1 1 d . . . 
H14A H -0.1745 -0.1449 0.0842 0.034 Uiso 1 1 calc R . . 
C15 C -0.1082(3) -0.2252(2) 0.2525(2) 0.0277(5) Uani 1 1 d . . . 
H15A H -0.1787 -0.2892 0.2924 0.033 Uiso 1 1 calc R . . 
C16 C 0.0295(3) -0.5970(2) 0.2747(2) 0.0225(4) Uani 1 1 d . . . 
H16A H 0.0026 -0.6634 0.3563 0.027 Uiso 1 1 calc R . . 
C17 C -0.0126(3) -0.5985(2) 0.1744(2) 0.0231(4) Uani 1 1 d . . . 
H17A H -0.0680 -0.6669 0.1874 0.028 Uiso 1 1 calc R . . 
C18 C 0.0246(3) -0.5016(2) 0.0543(2) 0.0206(4) Uani 1 1 d . . . 
C19 C 0.1112(3) -0.4064(3) 0.0400(2) 0.0284(5) Uani 1 1 d . . . 
H19A H 0.1418 -0.3401 -0.0408 0.034 Uiso 1 1 calc R . . 
C20 C 0.1523(3) -0.4081(3) 0.1416(2) 0.0271(5) Uani 1 1 d . . . 
H20A H 0.2118 -0.3432 0.1307 0.032 Uiso 1 1 calc R . . 
Sb1 Sb -0.44299(2) -0.242680(19) 0.979268(16) 0.03277(7) Uani 1 1 d . . . 
F1 F -0.4853(3) -0.4123(3) 1.0932(2) 0.0884(10) Uani 1 1 d . . . 
F2 F -0.6438(2) -0.1954(3) 0.9460(2) 0.0743(8) Uani 1 1 d . . . 
F4 F -0.2427(2) -0.2871(2) 1.0121(2) 0.0621(6) Uani 1 1 d . . . 
F3 F -0.3941(3) -0.0757(2) 0.8614(2) 0.0683(7) Uani 1 1 d . . . 
F5 F -0.3840(3) -0.3007(3) 0.8517(2) 0.0706(7) Uani 1 1 d . . . 
F6 F -0.4815(18) -0.1620(10) 1.0921(12) 0.078(3) Uani 0.50 1 d P . . 
F6' F -0.520(2) -0.2117(10) 1.1184(12) 0.086(4) Uani 0.50 1 d P . . 
  
loop_ 
 _atom_site_aniso_label 
 _atom_site_aniso_U_11 
 _atom_site_aniso_U_22 
 _atom_site_aniso_U_33 
 _atom_site_aniso_U_23 
 _atom_site_aniso_U_13 
 _atom_site_aniso_U_12 
Cu1 0.0258(2) 0.01661(18) 0.01329(17) -0.00376(14) -0.00427(14) -0.00724(14) 
O1 0.0318(9) 0.0208(8) 0.0282(8) -0.0041(7) -0.0116(7) -0.0128(7) 
O2 0.0384(11) 0.0271(10) 0.0709(16) -0.0021(10) -0.0225(11) -0.0186(8) 
O3 0.0415(10) 0.0193(8) 0.0156(7) -0.0032(6) -0.0083(7) -0.0072(7) 
O4 0.0263(8) 0.0328(9) 0.0178(7) -0.0108(7) -0.0054(6) -0.0104(7) 
N1 0.0242(9) 0.0192(9) 0.0240(9) -0.0058(8) -0.0083(8) -0.0076(7) 
N2 0.0251(10) 0.0202(10) 0.0480(13) -0.0060(9) -0.0109(10) -0.0091(8) 
N3 0.0282(10) 0.0175(9) 0.0175(9) -0.0023(7) -0.0059(7) -0.0050(7) 
N4 0.0221(9) 0.0236(9) 0.0178(8) -0.0092(7) -0.0058(7) -0.0050(7) 
C1 0.0268(11) 0.0262(11) 0.0222(11) -0.0087(9) -0.0076(9) -0.0068(9) 
C2 0.0253(11) 0.0264(11) 0.0209(10) -0.0052(9) -0.0037(9) -0.0091(9) 
C3 0.0205(10) 0.0212(11) 0.0254(11) -0.0073(9) -0.0061(9) -0.0057(8) 
C4 0.0267(11) 0.0246(11) 0.0251(11) -0.0075(9) -0.0108(9) -0.0076(9) 
C5 0.0283(11) 0.0221(11) 0.0220(11) -0.0043(9) -0.0096(9) -0.0072(9) 
C6 0.0299(13) 0.0239(12) 0.0344(13) -0.0007(10) -0.0088(11) -0.0091(10) 
C7 0.0279(12) 0.0269(12) 0.0298(12) -0.0071(10) -0.0089(10) -0.0074(9) 
C8 0.0216(10) 0.0201(10) 0.0277(11) -0.0078(9) -0.0055(9) -0.0057(8) 
C9 0.0267(12) 0.0246(11) 0.0336(13) -0.0060(10) -0.0119(10) -0.0069(9) 
C10 0.0280(12) 0.0287(13) 0.0433(15) -0.0093(11) -0.0170(11) -0.0065(10) 
C11 0.0366(14) 0.0311(13) 0.0285(12) -0.0014(10) -0.0150(11) -0.0161(11) 
C12 0.0393(14) 0.0336(14) 0.0290(13) 0.0031(11) -0.0153(11) -0.0213(11) 
C13 0.0258(11) 0.0214(11) 0.0224(12) -0.0035(9) -0.0069(9) -0.0075(9) 
C14 0.0354(13) 0.0260(12) 0.0238(11) -0.0037(10) -0.0108(10) -0.0151(10) 
C15 0.0361(13) 0.0221(11) 0.0241(11) -0.0027(9) -0.0084(10) -0.0140(10) 
C16 0.0310(12) 0.0201(10) 0.0165(10) -0.0052(8) -0.0054(9) -0.0075(9) 
C17 0.0295(12) 0.0232(11) 0.0195(10) -0.0081(9) -0.0052(9) -0.0094(9) 
C18 0.0235(10) 0.0224(11) 0.0177(10) -0.0085(9) -0.0045(8) -0.0049(8) 
C19 0.0376(13) 0.0323(13) 0.0157(10) -0.0045(9) -0.0034(9) -0.0190(11) 
C20 0.0321(12) 0.0313(12) 0.0209(11) -0.0081(10) -0.0032(9) -0.0179(10) 
Sb1 0.02825(11) 0.04344(12) 0.02817(11) -0.01297(8) -0.01143(7) -0.00436(7) 
F1 0.0837(18) 0.0770(17) 0.0655(15) 0.0297(13) -0.0421(14) -0.0341(14) 
F2 0.0303(10) 0.0951(18) 0.0508(12) 0.0195(12) -0.0164(9) -0.0184(10) 
F4 0.0413(10) 0.0704(14) 0.1025(18) -0.0539(14) -0.0417(11) 0.0126(9) 
F3 0.0706(15) 0.0473(11) 0.0881(17) -0.0068(11) -0.0411(13) -0.0262(10) 
F5 0.1020(19) 0.0786(16) 0.0536(13) -0.0415(12) -0.0262(13) -0.0091(14) 
F6 0.107(7) 0.080(7) 0.053(6) -0.050(6) -0.030(5) 0.046(6) 
F6' 0.132(9) 0.081(7) 0.046(5) -0.039(5) -0.036(5) 0.036(6) 
  
_geom_special_details 
; 
 All esds (except the esd in the dihedral angle between two l.s. planes) 
 are estimated using the full covariance matrix.  The cell esds are taken 
 into account individually in the estimation of esds in distances, angles 
 and torsion angles; correlations between esds in cell parameters are only 
 used when they are defined by crystal symmetry.  An approximate (isotropic) 
 treatment of cell esds is used for estimating esds involving l.s. planes. 
; 
  
loop_ 
 _geom_bond_atom_site_label_1 
 _geom_bond_atom_site_label_2 
 _geom_bond_distance 
 _geom_bond_site_symmetry_2 
 _geom_bond_publ_flag 
Cu1 O4 1.9542(16) 2_546 ? 
Cu1 O4 1.9542(16) . ? 
Cu1 O3 2.0155(16) . ? 
Cu1 O3 2.0155(16) 2_546 ? 
Cu1 O1 2.3629(17) 2_546 ? 
Cu1 O1 2.3629(17) . ? 
O1 N1 1.318(2) . ? 
O2 N2 1.304(3) . ? 
O3 N3 1.334(2) . ? 
O4 N4 1.340(2) . ? 
N1 C1 1.354(3) . ? 
N1 C5 1.354(3) . ? 
N2 C6 1.354(4) . ? 
N2 C10 1.360(4) . ? 
N3 C15 1.341(3) . ? 
N3 C11 1.346(3) . ? 
N4 C20 1.342(3) . ? 
N4 C16 1.348(3) . ? 
C1 C2 1.379(3) . ? 
C2 C3 1.399(3) . ? 
C3 C4 1.398(3) . ? 
C3 C8 1.483(3) . ? 
C4 C5 1.379(3) . ? 
C6 C7 1.375(3) . ? 
C7 C8 1.395(3) . ? 
C8 C9 1.390(3) . ? 
C9 C10 1.377(3) . ? 
C11 C12 1.379(3) . ? 
C12 C13 1.393(3) . ? 
C13 C14 1.390(3) . ? 
C13 C13 1.487(4) 2 ? 
C14 C15 1.378(3) . ? 
C16 C17 1.376(3) . ? 
C17 C18 1.392(3) . ? 
C18 C19 1.397(3) . ? 
C18 C18 1.482(4) 2_545 ? 
C19 C20 1.372(3) . ? 
Sb1 F6' 1.822(14) . ? 
Sb1 F1 1.858(2) . ? 
Sb1 F3 1.863(2) . ? 
Sb1 F4 1.8644(18) . ? 
Sb1 F5 1.869(2) . ? 
Sb1 F2 1.8692(19) . ? 
Sb1 F6 1.901(12) . ? 
F6 F6' 0.64(2) . ? 
  
loop_ 
 _geom_angle_atom_site_label_1 
 _geom_angle_atom_site_label_2 
 _geom_angle_atom_site_label_3 
 _geom_angle 
 _geom_angle_site_symmetry_1 
 _geom_angle_site_symmetry_3 
 _geom_angle_publ_flag 
O4 Cu1 O3 90.72(7) . . ? 
O4 Cu1 O3 89.28(7) . 2_546 ? 
O3 Cu1 O3 180.0 . 2_546 ? 
O4 Cu1 O1 95.70(7) . 2_546 ? 
O3 Cu1 O1 91.89(6) . 2_546 ? 
O4 Cu1 O1 84.30(7) . . ? 
O3 Cu1 O1 88.11(6) . . ? 
O3 Cu1 O1 91.89(6) 2_546 . ? 
N1 O1 Cu1 130.73(13) . . ? 
N3 O3 Cu1 123.09(14) . . ? 
N4 O4 Cu1 121.14(13) . . ? 
O1 N1 C1 120.41(19) . . ? 
O1 N1 C5 119.44(19) . . ? 
C1 N1 C5 120.1(2) . . ? 
O2 N2 C6 120.1(2) . . ? 
O2 N2 C10 120.6(2) . . ? 
C6 N2 C10 119.3(2) . . ? 
O3 N3 C15 121.01(19) . . ? 
O3 N3 C11 118.6(2) . . ? 
C15 N3 C11 120.4(2) . . ? 
O4 N4 C20 117.53(18) . . ? 
O4 N4 C16 121.20(18) . . ? 
C20 N4 C16 121.26(19) . . ? 
N1 C1 C2 120.5(2) . . ? 
C1 C2 C3 120.8(2) . . ? 
C4 C3 C2 117.1(2) . . ? 
C4 C3 C8 121.4(2) . . ? 
C2 C3 C8 121.5(2) . . ? 
C5 C4 C3 120.4(2) . . ? 
N1 C5 C4 120.9(2) . . ? 
N2 C6 C7 121.3(2) . . ? 
C6 C7 C8 121.0(2) . . ? 
C9 C8 C7 116.4(2) . . ? 
C9 C8 C3 122.0(2) . . ? 
C7 C8 C3 121.5(2) . . ? 
C10 C9 C8 121.5(2) . . ? 
N2 C10 C9 120.6(2) . . ? 
N3 C11 C12 120.5(2) . . ? 
C11 C12 C13 121.0(2) . . ? 
C14 C13 C12 116.4(2) . . ? 
C14 C13 C13 121.3(3) . 2 ? 
C12 C13 C13 122.3(3) . 2 ? 
C15 C14 C13 121.2(2) . . ? 
N3 C15 C14 120.5(2) . . ? 
N4 C16 C17 119.6(2) . . ? 
C16 C17 C18 121.1(2) . . ? 
C17 C18 C19 117.0(2) . . ? 
C17 C18 C18 122.0(3) . 2_545 ? 
C19 C18 C18 121.0(3) . 2_545 ? 
C20 C19 C18 120.5(2) . . ? 
N4 C20 C19 120.4(2) . . ? 
F6' Sb1 F1 80.8(3) . . ? 
F6' Sb1 F3 101.2(3) . . ? 
F1 Sb1 F3 177.66(13) . . ? 
F6' Sb1 F4 92.7(6) . . ? 
F1 Sb1 F4 89.21(11) . . ? 
F3 Sb1 F4 89.56(10) . . ? 
F6' Sb1 F5 169.7(4) . . ? 
F1 Sb1 F5 89.66(14) . . ? 
F3 Sb1 F5 88.37(12) . . ? 
F4 Sb1 F5 91.03(11) . . ? 
F6' Sb1 F2 86.9(6) . . ? 
F1 Sb1 F2 91.56(11) . . ? 
F3 Sb1 F2 89.70(10) . . ? 
F4 Sb1 F2 179.07(11) . . ? 
F5 Sb1 F2 89.50(13) . . ? 
F1 Sb1 F6 98.8(3) . . ? 
F3 Sb1 F6 83.1(3) . . ? 
F4 Sb1 F6 85.1(5) . . ? 
F5 Sb1 F6 170.7(4) . . ? 
F2 Sb1 F6 94.2(5) . . ? 
F6' F6 Sb1 73(2) . . ? 
F6 F6' Sb1 87(2) . . ? 
  
_diffrn_measured_fraction_theta_max    0.981 
_diffrn_reflns_theta_full              27.50 
_diffrn_measured_fraction_theta_full   0.982 

_refine_diff_density_max    1.57
_refine_diff_density_min   -0.63
_refine_diff_density_rms    0.09 

#===END of CIF
  
data_compound_9_sbcuno 

_refine_special_details 
; 
Four F atoms from (SbF6)- were each disordered over two positions with
occupancies of 0.47 and 0.53. 

One F atom from (SiF6)2- was disordered over two positions with 
occupancies of 0.6 and 0.4. All the above atoms together with the C and O
atoms from the coordinated MeOH molecule and (Et4N)+ were refined isotropically.

H atoms of the coordinated MeOH molecule could not be located. Disordered free
solvent molecules in the void were treated using the SQUEEZE module of PLATON. 
A total of 134 electrons/unitcell was found and attributed to 2.4 MeOH/unitcell.
The unlocated H atoms and the disordered solvent molecues were included in the 
formula and formula weight.
; 

# SQUEEZE RESULTS (APPEND TO CIF)
loop_
  _platon_squeeze_void_nr
  _platon_squeeze_void_average_x
  _platon_squeeze_void_average_y
  _platon_squeeze_void_average_z
  _platon_squeeze_void_volume
  _platon_squeeze_void_count_electrons
         1     0.213     0.560     0.000      89.3      17.0
         2     0.440     0.213     0.000      89.3      16.8
         3     0.560     0.787     0.000      89.3      16.8
         4     0.787     0.440     0.000      89.3      16.6
         5     0.060     0.287     0.500      89.3      16.8
         6     0.287     0.940     0.500      89.3      16.6
         7     0.713     0.060     0.500      89.3      17.0
         8     0.940     0.713     0.500      89.3      16.8
_platon_squeeze_details
; ?
;
  
_audit_creation_method         'enCIFer editing of SHELXL97 CIF output' 
_chemical_name_systematic 
; 
 ? 
; 
_chemical_name_common             ? 
_chemical_melting_point           ?  
_chemical_formula_moiety          
'C20.50 H16 Cu F3 N4 O4.52 Si0.50, C8 H20 N, 2(Sb F6), C H4 O'
_chemical_formula_sum 
 'C29.10 H40.40 Cu F15 N5 O5.10 Sb2 Si0.50' 
_chemical_formula_structural
'{[Cu 2(SbF6) 0.5(SiF6) (C8H20N) 2(C10H8N2O2) 0.5(CH4O)]0.6(CH4O)}'
_chemical_formula_weight          1147.95 
  
loop_ 
 _atom_type_symbol 
 _atom_type_description 
 _atom_type_scat_dispersion_real 
 _atom_type_scat_dispersion_imag 
 _atom_type_scat_source 
 'C'  'C'   0.0033   0.0016 
 'International Tables Vol C Tables 4.2.6.8 and 6.1.1.4' 
 'H'  'H'   0.0000   0.0000 
 'International Tables Vol C Tables 4.2.6.8 and 6.1.1.4' 
 'N'  'N'   0.0061   0.0033 
 'International Tables Vol C Tables 4.2.6.8 and 6.1.1.4' 
 'O'  'O'   0.0106   0.0060 
 'International Tables Vol C Tables 4.2.6.8 and 6.1.1.4' 
 'F'  'F'   0.0171   0.0103 
 'International Tables Vol C Tables 4.2.6.8 and 6.1.1.4' 
 'Si'  'Si'   0.0817   0.0704 
 'International Tables Vol C Tables 4.2.6.8 and 6.1.1.4' 
 'Cu'  'Cu'   0.3201   1.2651 
 'International Tables Vol C Tables 4.2.6.8 and 6.1.1.4' 
 'Sb'  'Sb'  -0.5866   1.5461 
 'International Tables Vol C Tables 4.2.6.8 and 6.1.1.4' 
  
_symmetry_cell_setting            Tetragonal 
_symmetry_space_group_name_H-M    I4/m 
  
loop_ 
 _symmetry_equiv_pos_as_xyz 
 'x, y, z' 
 '-x, -y, z' 
 '-y, x, z' 
 'y, -x, z' 
 'x+1/2, y+1/2, z+1/2' 
 '-x+1/2, -y+1/2, z+1/2' 
 '-y+1/2, x+1/2, z+1/2' 
 'y+1/2, -x+1/2, z+1/2' 
 '-x, -y, -z' 
 'x, y, -z' 
 'y, -x, -z' 
 '-y, x, -z' 
 '-x+1/2, -y+1/2, -z+1/2' 
 'x+1/2, y+1/2, -z+1/2' 
 'y+1/2, -x+1/2, -z+1/2' 
 '-y+1/2, x+1/2, -z+1/2' 
  
_cell_length_a                    16.9501(8) 
_cell_length_b                    16.9501(8) 
_cell_length_c                    15.3669(14) 
_cell_angle_alpha                 90.00 
_cell_angle_beta                  90.00 
_cell_angle_gamma                 90.00 
_cell_volume                      4415(1) 
_cell_formula_units_Z             4 
_cell_measurement_temperature     150(2) 
_cell_measurement_reflns_used     4976 
_cell_measurement_theta_min       2.4 
_cell_measurement_theta_max       27.1 
  
_exptl_crystal_description       'Hexagonal plate'
_exptl_crystal_colour             RED 
_exptl_crystal_size_max           0.174 
_exptl_crystal_size_mid           0.121 
_exptl_crystal_size_min           0.079 
_exptl_crystal_density_meas       ? 
_exptl_crystal_density_diffrn     1.727 
_exptl_crystal_density_method     'not measured' 
_exptl_crystal_F_000              2255 
_exptl_absorpt_coefficient_mu     1.809 
_exptl_absorpt_correction_type    multi-scan 
_exptl_absorpt_correction_T_min   0.867 
_exptl_absorpt_correction_T_max   1.000 
_exptl_absorpt_process_details    'Bruker SADABS v2.03' 
  
_exptl_special_details 
; 
 ? 
; 
  
_diffrn_ambient_temperature       150(2) 
_diffrn_radiation_wavelength      0.71073 
_diffrn_radiation_type            MoK\a 
_diffrn_radiation_source          'sealed tube'
_diffrn_radiation_monochromator   graphite 
_diffrn_measurement_device_type   'Bruker SMART APEX CCD area detector' 
_diffrn_measurement_method        omega 
_diffrn_detector_area_resol_mean  ? 
_diffrn_standards_number          0 
_diffrn_standards_interval_count  . 
_diffrn_standards_interval_time   ? 
_diffrn_standards_decay_%         0 
_diffrn_reflns_number             2624 
_diffrn_reflns_av_R_equivalents   0.0187 
_diffrn_reflns_av_sigmaI/netI     0.0158 
_diffrn_reflns_limit_h_min       -21 
_diffrn_reflns_limit_h_max        9 
_diffrn_reflns_limit_k_min       -21 
_diffrn_reflns_limit_k_max        21 
_diffrn_reflns_limit_l_min       -19 
_diffrn_reflns_limit_l_max        19 
_diffrn_reflns_theta_min          2.65 
_diffrn_reflns_theta_max          27.47 
_reflns_number_total              2619 
_reflns_number_gt                 2339 
_reflns_threshold_expression      >2sigma(I) 
  
_computing_data_collection        'Bruker SMART version 5.625 (Bruker, 2001)' 
_computing_cell_refinement        'Bruker SAINT version 6.36A (Bruker, 2000)' 
_computing_data_reduction         'Bruker SAINT; SHELXTL (Sheldrick, 2008)' 
_computing_structure_solution     'SHELXS97 (Sheldrick, 2008)' 
_computing_structure_refinement   'SHELXL97 (Sheldrick, 2008)' 
_computing_molecular_graphics     ? 
_computing_publication_material   
'enCIFer(Allen et al.,2004);PLATON(Spek,2003)' 
  

  
_refine_ls_structure_factor_coef  Fsqd 
_refine_ls_matrix_type            full 
_refine_ls_weighting_scheme       calc 
_refine_ls_weighting_details 
 'calc w=1/[\s^2^(Fo^2^)+(0.1177P)^2^+60.16P] where P=(Fo^2^+2Fc^2^)/3' 
_atom_sites_solution_primary      direct 
_atom_sites_solution_secondary    difmap 
_atom_sites_solution_hydrogens    geom 
_refine_ls_hydrogen_treatment     constr
_refine_ls_extinction_method      none 
_refine_ls_extinction_coef        ? 
_refine_ls_number_reflns          2619 
_refine_ls_number_parameters      132 
_refine_ls_number_restraints      55 
_refine_ls_R_factor_all           0.0922 
_refine_ls_R_factor_gt            0.0870 
_refine_ls_wR_factor_ref          0.251
_refine_ls_wR_factor_gt           0.247 
_refine_ls_goodness_of_fit_ref    1.11
_refine_ls_restrained_S_all       1.10
_refine_ls_shift/su_max           0.000 
_refine_ls_shift/su_mean          0.000 
  
loop_ 
 _atom_site_label 
 _atom_site_type_symbol 
 _atom_site_fract_x 
 _atom_site_fract_y 
 _atom_site_fract_z 
 _atom_site_U_iso_or_equiv 
 _atom_site_adp_type 
 _atom_site_occupancy 
 _atom_site_symmetry_multiplicity 
 _atom_site_calc_flag 
 _atom_site_refinement_flags 
 _atom_site_disorder_assembly 
 _atom_site_disorder_group 
Cu Cu 0.0000 0.0000 0.23442(10) 0.0304(4) Uani 1 4 d S . . 
O1 O -0.0002(2) 0.1138(2) 0.2296(3) 0.0389(11) Uani 1 1 d . . . 
N1 N -0.0700(3) 0.1511(3) 0.2363(4) 0.0340(11) Uani 1 1 d . . . 
C1 C -0.1050(5) 0.1574(5) 0.3129(5) 0.0527(19) Uani 1 1 d . . . 
H1A H -0.0808 0.1353 0.3630 0.063 Uiso 1 1 calc R . . 
C2 C -0.1767(5) 0.1960(5) 0.3204(5) 0.057(2) Uani 1 1 d . . . 
H2A H -0.2021 0.1998 0.3753 0.068 Uiso 1 1 calc R . . 
C3 C -0.2116(3) 0.2294(3) 0.2461(4) 0.0340(12) Uani 1 1 d . . . 
C4 C -0.1736(4) 0.2199(4) 0.1698(5) 0.0463(16) Uani 1 1 d . . . 
H4A H -0.1963 0.2406 0.1182 0.056 Uiso 1 1 calc R . . 
C5 C -0.1024(4) 0.1805(4) 0.1650(5) 0.0451(16) Uani 1 1 d . . . 
H5A H -0.0766 0.1746 0.1105 0.054 Uiso 1 1 calc R . . 
Sb Sb 0.07247(6) 0.29252(6) 0.0000 0.0670(4) Uani 1 2 d SD . . 
F3A F 0.0721(3) 0.2922(3) 0.1215(5) 0.091(2) Uiso 1 1 d D A . 
F1A F 0.0508(14) 0.4009(6) 0.0000 0.074(7) Uiso 0.47(4) 2 d SPD A 1 
F2A F 0.1806(6) 0.3136(15) 0.0000 0.104(8) Uiso 0.47(4) 2 d SPD A 1 
F5A F -0.0363(6) 0.2714(15) 0.0000 0.104(8) Uiso 0.47(4) 2 d SPD A 1 
F6A F 0.0932(16) 0.1839(6) 0.0000 0.125(10) Uiso 0.47(4) 2 d SPD A 1 
F1A' F 0.0897(15) 0.4029(8) 0.0000 0.110(8) Uiso 0.53(4) 2 d SPD A 2 
F2A' F 0.1831(8) 0.2755(14) 0.0000 0.089(7) Uiso 0.53(4) 2 d SPD A 2 
F5A' F -0.0381(8) 0.3096(15) 0.0000 0.121(9) Uiso 0.53(4) 2 d SPD A 2 
F6A' F 0.0554(14) 0.1823(8) 0.0000 0.087(7) Uiso 0.53(4) 2 d SPD A 2 
Si Si 0.0000 0.0000 0.5000 0.0328(9) Uani 1 8 d SD . . 
F1 F 0.0783(6) 0.0610(7) 0.5000 0.046(3) Uiso 0.50 2 d SPD . . 
F1' F 0.0959(5) 0.0256(7) 0.5000 0.037(2) Uiso 0.50 2 d SPD . . 
F2 F 0.0000 0.0000 0.3908(5) 0.0443(17) Uani 1 4 d S . . 
N1E N 0.0000 0.5000 0.2500 0.070(4) Uani 1 4 d SD . . 
C1E C -0.0202(13) 0.4349(9) 0.3098(11) 0.144(7) Uiso 1 1 d D . . 
C2E C -0.0596(17) 0.3653(14) 0.2647(19) 0.123(9) Uiso 0.60 1 d PD B 1 
C2E' C 0.037(3) 0.366(3) 0.310(4) 0.17(2) Uiso 0.40 1 d PD B 2 
C1S C 0.0000 0.0000 0.0000 0.082(8) Uiso 1 8 d SD . . 
O1S O 0.017(7) 0.034(4) 0.0818(18) 0.10(2) Uiso 0.13 1 d PD . . 
  
loop_ 
 _atom_site_aniso_label 
 _atom_site_aniso_U_11 
 _atom_site_aniso_U_22 
 _atom_site_aniso_U_33 
 _atom_site_aniso_U_23 
 _atom_site_aniso_U_13 
 _atom_site_aniso_U_12 
Cu 0.0200(4) 0.0200(4) 0.0512(9) 0.000 0.000 0.000 
O1 0.0220(18) 0.0242(18) 0.071(3) 0.0074(19) 0.0056(19) 0.0038(14) 
N1 0.027(2) 0.020(2) 0.055(3) 0.002(2) 0.001(2) 0.0029(16) 
C1 0.054(4) 0.058(4) 0.045(4) 0.010(3) -0.001(3) 0.030(3) 
C2 0.061(5) 0.067(5) 0.041(4) 0.010(3) 0.006(3) 0.037(4) 
C3 0.037(3) 0.028(3) 0.037(3) 0.001(2) -0.005(2) 0.009(2) 
C4 0.042(3) 0.054(4) 0.043(3) 0.002(3) -0.004(3) 0.018(3) 
C5 0.041(3) 0.053(4) 0.041(3) 0.003(3) 0.006(3) 0.014(3) 
Sb 0.0841(7) 0.0589(6) 0.0581(6) 0.000 0.000 -0.0053(4) 
Si 0.0355(14) 0.0355(14) 0.027(2) 0.000 0.000 0.000 
F2 0.052(3) 0.052(3) 0.029(3) 0.000 0.000 0.000 
N1E 0.061(5) 0.061(5) 0.087(11) 0.000 0.000 0.000 
  
_geom_special_details 
; 
 All esds (except the esd in the dihedral angle between two l.s. planes) 
 are estimated using the full covariance matrix.  The cell esds are taken 
 into account individually in the estimation of esds in distances, angles 
 and torsion angles; correlations between esds in cell parameters are only 
 used when they are defined by crystal symmetry.  An approximate (isotropic) 
 treatment of cell esds is used for estimating esds involving l.s. planes. 
; 
  
loop_ 
 _geom_bond_atom_site_label_1 
 _geom_bond_atom_site_label_2 
 _geom_bond_distance 
 _geom_bond_site_symmetry_2 
 _geom_bond_publ_flag 
Cu O1 1.930(4) . ? 
Cu F2 2.404(8) . ? 
Cu O1S 2.43(4) 2 ? 
Cu O1S 2.43(4) . ? 
O1 N1 1.346(6) . ? 
N1 C1 1.322(9) . ? 
N1 C5 1.322(9) . ? 
C1 C2 1.386(9) . ? 
C2 C3 1.405(9) . ? 
C3 C4 1.347(10) . ? 
C3 C3 1.482(11) 13_455 ? 
C4 C5 1.381(9) . ? 
Sb F1A 1.873(9) . ? 
Sb F2A 1.868(10) . ? 
Sb F3A 1.866(7) . ? 
Sb F5A 1.878(10) . ? 
Sb F6A 1.874(10) . ? 
Sb F1A' 1.894(14) . ? 
Sb F2A' 1.898(14) . ? 
Sb F5A' 1.897(14) . ? 
Sb F6A' 1.890(14) . ? 
Si F2 1.678(7) . ? 
Si F1' 1.682(8) . ? 
Si F1 1.683(9) . ? 
N1E C1E 1.476(9) . ? 
C1E C2E' 1.516(10) . ? 
C1E C2E 1.523(10) . ? 
C1S O1S 1.415(10) . ? 
  
loop_ 
 _geom_angle_atom_site_label_1 
 _geom_angle_atom_site_label_2 
 _geom_angle_atom_site_label_3 
 _geom_angle 
 _geom_angle_site_symmetry_1 
 _geom_angle_site_symmetry_3 
 _geom_angle_publ_flag 
O1 Cu O1 89.915(13) 4 . ? 
O1 Cu O1 175.6(3) 2 . ? 
O1 Cu F2 92.21(16) . . ? 
O1 Cu O1S 101.7(16) . 2 ? 
O1 Cu O1S 81(3) 3 2 ? 
F2 Cu O1S 164.5(10) . 2 ? 
O1 Cu O1S 74.0(16) 4 4 ? 
O1 Cu O1S 95(3) . 4 ? 
N1 O1 Cu 118.0(3) . . ? 
C1 N1 C5 121.4(5) . . ? 
C1 N1 O1 120.0(5) . . ? 
C5 N1 O1 118.6(6) . . ? 
N1 C1 C2 120.4(7) . . ? 
C1 C2 C3 119.5(7) . . ? 
C4 C3 C2 117.2(6) . . ? 
C4 C3 C3 123.2(7) . 13_455 ? 
C2 C3 C3 119.6(7) . 13_455 ? 
C3 C4 C5 121.5(7) . . ? 
N1 C5 C4 120.0(7) . . ? 
F3A Sb F3A 179.5(4) 10 . ? 
F3A Sb F2A 90.21(17) . . ? 
F3A Sb F1A 90.15(17) . . ? 
F2A Sb F1A 90.3(3) . . ? 
F3A Sb F6A 89.85(17) . . ? 
F2A Sb F6A 90.2(3) . . ? 
F1A Sb F6A 179.5(4) . . ? 
F3A Sb F5A 89.79(17) . . ? 
F2A Sb F5A 180.0(4) . . ? 
F1A Sb F5A 89.7(3) . . ? 
F6A Sb F5A 89.8(3) . . ? 
F3A Sb F6A' 89.79(17) . . ? 
F2A Sb F6A' 109.8(6) . . ? 
F1A Sb F6A' 159.9(6) . . ? 
F3A Sb F1A' 90.21(17) . . ? 
F6A Sb F1A' 160.3(6) . . ? 
F5A Sb F1A' 109.8(6) . . ? 
F6A' Sb F1A' 180.0(4) . . ? 
F6A' Sb F5A' 90.0(3) . . ? 
F1A' Sb F5A' 90.1(3) . . ? 
F3A Sb F2A' 90.15(17) . . ? 
F6A' Sb F2A' 90.1(3) . . ? 
F1A' Sb F2A' 89.9(3) . . ? 
F5A' Sb F2A' 180.0(4) . . ? 
F1 Si F1 180.0(6) . 9_556 ? 
C1E N1E C1E 112.8(8) 16 . ? 
C1E N1E C1E 103.0(16) 16 15_455 ? 
C1E N1E C1E 112.8(8) . 15_455 ? 
N1E C1E C2E' 115(3) . . ? 
N1E C1E C2E 113.4(16) . . ? 
C1S O1S Cu 137(3) . . ? 
  
_diffrn_measured_fraction_theta_max    0.995 
_diffrn_reflns_theta_full              27.47 
_diffrn_measured_fraction_theta_full   0.995 

_refine_diff_density_max    2.37
_refine_diff_density_min   -1.44
_refine_diff_density_rms    0.18

#===END of CIF


data_compound_10_NOBFCU

_audit_creation_method         'enCIFer editing of SHELXL97 CIF output'
_chemical_name_systematic         '?'
_chemical_name_common             ?
_chemical_melting_point           ?
_chemical_formula_moiety          ?
_chemical_formula_sum             'C60 H48 B2 Cu F8 N12 O12'
_chemical_formula_weight          1366.26
  
loop_
  _atom_type_symbol
  _atom_type_description
  _atom_type_scat_dispersion_real
  _atom_type_scat_dispersion_imag
  _atom_type_scat_source
 'C' 'C' 0.0033 0.0016 'International Tables Vol C Tables 4.2.6.8 and 6.1.1.4'
 'H' 'H' 0.0000 0.0000 'International Tables Vol C Tables 4.2.6.8 and 6.1.1.4'
 'N' 'N' 0.0061 0.0033 'International Tables Vol C Tables 4.2.6.8 and 6.1.1.4'
 'O' 'O' 0.0106 0.0060 'International Tables Vol C Tables 4.2.6.8 and 6.1.1.4'
 'Cu' 'Cu' 0.3201 1.2651 'International Tables Vol C Tables 4.2.6.8 and 6.1.1.4'
 'B' 'B' 0.0013 0.0007 'International Tables Vol C Tables 4.2.6.8 and 6.1.1.4'
 'F' 'F' 0.0171 0.0103 'International Tables Vol C Tables 4.2.6.8 and 6.1.1.4'

_symmetry_cell_setting            Triclinic
_symmetry_space_group_name_H-M    P-1
  
loop_
  _symmetry_equiv_pos_as_xyz
 'x, y, z'
 '-x, -y, -z'

_cell_length_a                    8.8698(10)
_cell_length_b                    11.5176(13)
_cell_length_c                    14.167(2)
_cell_angle_alpha                 104.558(2)
_cell_angle_beta                  96.540(2)
_cell_angle_gamma                 99.413(2)
_cell_volume                      1363.6(3)
_cell_formula_units_Z             1
_cell_measurement_temperature     150(2)
_cell_measurement_reflns_used     4215
_cell_measurement_theta_min       2.35
_cell_measurement_theta_max       27.45
  
_exptl_crystal_description        plate
_exptl_crystal_colour             red
_exptl_crystal_size_max           0.27
_exptl_crystal_size_mid           0.15
_exptl_crystal_size_min           0.05
_exptl_crystal_density_meas       ?
_exptl_crystal_density_diffrn     1.664
_exptl_crystal_density_method     'not measured'
_exptl_crystal_F_000              699
_exptl_absorpt_coefficient_mu     0.510
_exptl_absorpt_correction_type    multi-scan
_exptl_absorpt_correction_T_min   0.940
_exptl_absorpt_correction_T_max   1.000
_exptl_absorpt_process_details    'Bruker SADABS v2.03'
  
_exptl_special_details            '?'
  
_diffrn_ambient_temperature       150(2)
_diffrn_radiation_wavelength      0.71073
_diffrn_radiation_type            MoK\a
_diffrn_radiation_source          'normal-focus sealed tube'
_diffrn_radiation_monochromator   graphite
_diffrn_measurement_device_type   'Bruker SMART APEX CCD area detector'
_diffrn_measurement_method        omega
_diffrn_detector_area_resol_mean  ?
_diffrn_standards_number          0
_diffrn_standards_interval_count  .
_diffrn_standards_interval_time   ?
_diffrn_standards_decay_%         0
_diffrn_reflns_number             12383
_diffrn_reflns_av_R_equivalents   0.023
_diffrn_reflns_av_sigmaI/netI     0.0340
_diffrn_reflns_limit_h_min        -11
_diffrn_reflns_limit_h_max        11
_diffrn_reflns_limit_k_min        -14
_diffrn_reflns_limit_k_max        14
_diffrn_reflns_limit_l_min        -18
_diffrn_reflns_limit_l_max        17
_diffrn_reflns_theta_min          2.05
_diffrn_reflns_theta_max          27.50
_reflns_number_total              6144
_reflns_number_gt                 5166
_reflns_threshold_expression      >2sigma(I)
  
_computing_data_collection        'Bruker SMART version 5.625 (Bruker, 2001)'
_computing_cell_refinement        'Bruker SAINT version 6.36A (Bruker, 2000)'
_computing_data_reduction         'Bruker SAINT; SHELXTL (Sheldrick, 2008)' 
_computing_structure_solution     'SHELXS97 (Sheldrick, 2008)' 
_computing_structure_refinement   'SHELXL97 (Sheldrick, 2008)' 
_computing_molecular_graphics     ?
_computing_publication_material   'enCIFer (CCDC, 2003) PLATON (Spek, 2003)'
  
_refine_special_details           
;
 Refinement of F^2^ against ALL reflections. The weighted R-factor wR and
 goodness of fit S are based on F^2^, conventional R-factors R are based
 on F, with F set to zero for negative F^2^. The threshold expression of
 F^2^ > 2sigma(F^2^) is used only for calculating R-factors(gt) etc. and is
 not relevant to the choice of reflections for refinement. R-factors based
 on F^2^ are statistically about twice as large as those based on F, and R-
 factors based on ALL data will be even larger.
;
  
_refine_ls_structure_factor_coef  Fsqd
_refine_ls_matrix_type            full
_refine_ls_weighting_scheme       calc
_refine_ls_weighting_details      
;
calc w=1/[\s^2^(Fo^2^)+(0.0547P)^2^+0.4235P] where P=(Fo^2^+2Fc^2^)/3
;
_atom_sites_solution_primary      direct
_atom_sites_solution_secondary    difmap
_atom_sites_solution_hydrogens    'geometrically placed'
_refine_ls_hydrogen_treatment     'riding model'
_refine_ls_extinction_method      none
_refine_ls_extinction_coef        ?
_refine_ls_number_reflns          6144
_refine_ls_number_parameters      430
_refine_ls_number_restraints      0
_refine_ls_R_factor_all           0.0447
_refine_ls_R_factor_gt            0.0366
_refine_ls_wR_factor_ref          0.0983
_refine_ls_wR_factor_gt           0.0952
_refine_ls_goodness_of_fit_ref    1.038
_refine_ls_restrained_S_all       1.038
_refine_ls_shift/su_max           0.001
_refine_ls_shift/su_mean          0.000
  
loop_
  _atom_site_label
  _atom_site_type_symbol
  _atom_site_fract_x
  _atom_site_fract_y
  _atom_site_fract_z
  _atom_site_U_iso_or_equiv
  _atom_site_adp_type
  _atom_site_occupancy
  _atom_site_symmetry_multiplicity
  _atom_site_calc_flag
  _atom_site_refinement_flags
  _atom_site_disorder_assembly
  _atom_site_disorder_group
 Cu1 Cu 0.0000 0.0000 0.0000 0.01528(9) Uani 1 2 d S . .
 C1 C -0.1638(2) -0.24256(16) -0.19519(13) 0.0194(4) Uani 1 1 d . . .
 H1A H -0.2095 -0.1723 -0.1819 0.023 Uiso 1 1 calc R . .
 N1 N -0.06063(16) -0.25950(13) -0.12461(10) 0.0162(3) Uani 1 1 d . . .
 O1 O -0.22372(14) -0.02423(11) -0.04891(9) 0.0209(3) Uani 1 1 d . . .
 B1 B 0.2871(3) 0.3040(2) -0.32382(16) 0.0279(5) Uani 1 1 d . . .
 F1 F 0.41548(15) 0.37662(12) -0.34290(10) 0.0433(3) Uani 1 1 d . . .
 C2 C -0.2028(2) -0.32733(16) -0.28649(13) 0.0198(4) Uani 1 1 d . . .
 H2A H -0.2742 -0.3140 -0.3361 0.024 Uiso 1 1 calc R . .
 N2 N -0.19137(17) -0.66695(14) -0.60154(11) 0.0204(3) Uani 1 1 d . . .
 O2 O -0.82476(15) 0.61136(12) 0.07582(10) 0.0258(3) Uani 1 1 d . . .
 F2 F 0.18943(15) 0.24355(12) -0.41328(9) 0.0394(3) Uani 1 1 d . . .
 C3 C -0.13937(19) -0.43243(15) -0.30746(13) 0.0173(3) Uani 1 1 d . . .
 N3 N -0.30866(16) 0.06186(13) -0.02672(11) 0.0175(3) Uani 1 1 d . . .
 O3 O -0.01792(14) -0.17978(11) -0.03540(9) 0.0189(3) Uani 1 1 d . . .
 F3 F 0.33740(17) 0.21874(12) -0.28040(9) 0.0424(3) Uani 1 1 d . . .
 C4 C -0.0397(2) -0.44881(16) -0.23039(13) 0.0193(4) Uani 1 1 d . . .
 H4A H 0.0021 -0.5210 -0.2404 0.023 Uiso 1 1 calc R . .
 N4 N -0.74712(17) 0.52318(13) 0.06095(11) 0.0193(3) Uani 1 1 d . . .
 O4 O -0.19971(16) -0.73443(12) -0.69115(9) 0.0262(3) Uani 1 1 d . . .
 F4 F 0.20981(15) 0.37722(12) -0.26143(9) 0.0398(3) Uani 1 1 d . . .
 C5 C -0.0008(2) -0.36232(16) -0.14021(13) 0.0188(4) Uani 1 1 d . . .
 H5A H 0.0680 -0.3747 -0.0888 0.023 Uiso 1 1 calc R . .
 N5 N 0.00869(17) -0.04154(13) 0.21856(11) 0.0182(3) Uani 1 1 d . . .
 O5 O -0.08048(15) -0.02230(12) 0.14540(9) 0.0230(3) Uani 1 1 d . . .
 C6 C -0.1667(2) -0.51784(15) -0.40809(13) 0.0177(3) Uani 1 1 d . . .
 N6 N 0.48298(17) -0.13113(13) 0.61948(11) 0.0195(3) Uani 1 1 d . . .
 O6 O 0.57059(15) -0.14702(13) 0.69365(10) 0.0271(3) Uani 1 1 d . . .
 C7 C -0.2744(2) -0.51122(16) -0.48570(14) 0.0217(4) Uani 1 1 d . . .
 H7A H -0.3412 -0.4545 -0.4729 0.026 Uiso 1 1 calc R . .
 C8 C -0.2859(2) -0.58476(17) -0.58005(14) 0.0230(4) Uani 1 1 d . . .
 H8A H -0.3607 -0.5784 -0.6311 0.028 Uiso 1 1 calc R . .
 C9 C -0.0874(2) -0.67655(16) -0.52716(13) 0.0210(4) Uani 1 1 d . . .
 H9A H -0.0226 -0.7346 -0.5412 0.025 Uiso 1 1 calc R . .
 C10 C -0.0738(2) -0.60448(16) -0.43213(13) 0.0194(4) Uani 1 1 d . . .
 H10A H 0.0002 -0.6136 -0.3818 0.023 Uiso 1 1 calc R . .
 C11 C -0.3054(2) 0.12583(16) 0.06765(13) 0.0190(4) Uani 1 1 d . . .
 H11A H -0.2413 0.1106 0.1198 0.023 Uiso 1 1 calc R . .
 C12 C -0.3952(2) 0.21327(16) 0.08837(13) 0.0189(4) Uani 1 1 d . . .
 H12A H -0.3925 0.2582 0.1549 0.023 Uiso 1 1 calc R . .
 C13 C -0.49055(19) 0.23633(15) 0.01210(13) 0.0172(3) Uani 1 1 d . . .
 C14 C -0.4934(2) 0.16499(16) -0.08369(13) 0.0194(4) Uani 1 1 d . . .
 H14A H -0.5591 0.1761 -0.1371 0.023 Uiso 1 1 calc R . .
 C15 C -0.4023(2) 0.07878(16) -0.10187(13) 0.0194(4) Uani 1 1 d . . .
 H15A H -0.4052 0.0310 -0.1676 0.023 Uiso 1 1 calc R . .
 C16 C -0.6168(2) 0.53036(16) 0.12487(14) 0.0215(4) Uani 1 1 d . . .
 H16A H -0.5825 0.6005 0.1799 0.026 Uiso 1 1 calc R . .
 C17 C -0.5342(2) 0.43819(16) 0.11122(13) 0.0202(4) Uani 1 1 d . . .
 H17A H -0.4439 0.4453 0.1570 0.024 Uiso 1 1 calc R . .
 C18 C -0.58156(19) 0.33406(16) 0.03073(13) 0.0171(3) Uani 1 1 d . . .
 C19 C -0.7164(2) 0.32863(16) -0.03327(13) 0.0194(4) Uani 1 1 d . . .
 H19A H -0.7531 0.2591 -0.0886 0.023 Uiso 1 1 calc R . .
 C20 C -0.7965(2) 0.42236(16) -0.01730(13) 0.0203(4) Uani 1 1 d . . .
 H20A H -0.8879 0.4166 -0.0617 0.024 Uiso 1 1 calc R . .
 C21 C 0.0823(2) -0.13731(16) 0.20305(13) 0.0202(4) Uani 1 1 d . . .
 H21A H 0.0706 -0.1909 0.1385 0.024 Uiso 1 1 calc R . .
 C22 C 0.1737(2) -0.15745(16) 0.28021(13) 0.0197(4) Uani 1 1 d . . .
 H22A H 0.2235 -0.2255 0.2682 0.024 Uiso 1 1 calc R . .
 C23 C 0.19459(19) -0.07976(16) 0.37575(13) 0.0177(3) Uani 1 1 d . . .
 C24 C 0.1164(2) 0.01807(16) 0.38857(13) 0.0198(4) Uani 1 1 d . . .
 H24A H 0.1268 0.0733 0.4524 0.024 Uiso 1 1 calc R . .
 C25 C 0.0250(2) 0.03526(16) 0.31022(13) 0.0199(4) Uani 1 1 d . . .
 H25A H -0.0274 0.1019 0.3206 0.024 Uiso 1 1 calc R . .
 C26 C 0.29452(19) -0.09747(15) 0.45953(13) 0.0174(3) Uani 1 1 d . . .
 C27 C 0.4043(2) -0.17212(16) 0.44595(13) 0.0199(4) Uani 1 1 d . . .
 H27A H 0.4156 -0.2131 0.3808 0.024 Uiso 1 1 calc R . .
 C28 C 0.4959(2) -0.18722(16) 0.52486(14) 0.0214(4) Uani 1 1 d . . .
 H28A H 0.5700 -0.2380 0.5133 0.026 Uiso 1 1 calc R . .
 C29 C 0.3778(2) -0.05789(16) 0.63507(13) 0.0201(4) Uani 1 1 d . . .
 H29A H 0.3676 -0.0184 0.7008 0.024 Uiso 1 1 calc R . .
 C30 C 0.2857(2) -0.03987(16) 0.55752(13) 0.0192(4) Uani 1 1 d . . .
 H30A H 0.2144 0.0130 0.5708 0.023 Uiso 1 1 calc R . .

loop_
  _atom_site_aniso_label
  _atom_site_aniso_U_11
  _atom_site_aniso_U_22
  _atom_site_aniso_U_33
  _atom_site_aniso_U_23
  _atom_site_aniso_U_13
  _atom_site_aniso_U_12
 Cu1 0.01600(15) 0.01405(15) 0.01524(16) 0.00162(11) -0.00032(11) 0.00718(11)
 C1 0.0212(9) 0.0184(8) 0.0192(9) 0.0041(7) 0.0018(7) 0.0087(7)
 N1 0.0186(7) 0.0150(7) 0.0144(7) 0.0025(6) 0.0020(5) 0.0043(6)
 O1 0.0183(6) 0.0179(6) 0.0234(7) -0.0020(5) -0.0022(5) 0.0106(5)
 B1 0.0339(12) 0.0291(11) 0.0187(10) -0.0009(9) -0.0039(9) 0.0176(10)
 F1 0.0435(8) 0.0417(8) 0.0432(8) 0.0071(6) 0.0065(6) 0.0122(6)
 C2 0.0203(8) 0.0205(9) 0.0183(9) 0.0045(7) -0.0011(7) 0.0074(7)
 N2 0.0236(8) 0.0189(7) 0.0163(7) 0.0030(6) 0.0032(6) 0.0004(6)
 O2 0.0242(7) 0.0206(6) 0.0342(8) 0.0049(6) 0.0035(6) 0.0141(5)
 F2 0.0436(7) 0.0397(7) 0.0267(6) -0.0074(5) -0.0108(5) 0.0225(6)
 C3 0.0176(8) 0.0151(8) 0.0179(9) 0.0031(7) 0.0026(6) 0.0020(6)
 N3 0.0157(7) 0.0168(7) 0.0193(7) 0.0028(6) 0.0012(6) 0.0065(6)
 O3 0.0271(6) 0.0150(6) 0.0125(6) -0.0005(5) 0.0000(5) 0.0072(5)
 F3 0.0655(9) 0.0390(7) 0.0270(7) 0.0086(6) -0.0009(6) 0.0292(7)
 C4 0.0233(9) 0.0163(8) 0.0200(9) 0.0047(7) 0.0047(7) 0.0083(7)
 N4 0.0174(7) 0.0186(7) 0.0240(8) 0.0064(6) 0.0051(6) 0.0077(6)
 O4 0.0323(7) 0.0278(7) 0.0133(6) -0.0012(5) 0.0032(5) 0.0023(6)
 F4 0.0404(7) 0.0485(8) 0.0265(6) -0.0061(6) -0.0003(5) 0.0275(6)
 C5 0.0206(8) 0.0182(8) 0.0198(9) 0.0067(7) 0.0026(7) 0.0077(7)
 N5 0.0192(7) 0.0203(7) 0.0154(7) 0.0050(6) 0.0013(6) 0.0062(6)
 O5 0.0246(7) 0.0307(7) 0.0153(6) 0.0061(5) -0.0015(5) 0.0135(6)
 C6 0.0188(8) 0.0150(8) 0.0179(9) 0.0035(7) 0.0018(6) 0.0020(7)
 N6 0.0192(7) 0.0198(7) 0.0197(8) 0.0070(6) -0.0012(6) 0.0049(6)
 O6 0.0278(7) 0.0333(8) 0.0217(7) 0.0095(6) -0.0040(5) 0.0130(6)
 C7 0.0218(9) 0.0197(9) 0.0223(9) 0.0038(7) -0.0004(7) 0.0063(7)
 C8 0.0238(9) 0.0226(9) 0.0212(9) 0.0063(8) -0.0021(7) 0.0043(7)
 C9 0.0229(9) 0.0184(9) 0.0209(9) 0.0031(7) 0.0043(7) 0.0052(7)
 C10 0.0207(8) 0.0196(9) 0.0177(9) 0.0059(7) 0.0008(7) 0.0040(7)
 C11 0.0184(8) 0.0211(9) 0.0171(8) 0.0047(7) -0.0009(6) 0.0061(7)
 C12 0.0192(8) 0.0214(9) 0.0158(8) 0.0033(7) 0.0017(7) 0.0068(7)
 C13 0.0151(8) 0.0173(8) 0.0197(9) 0.0052(7) 0.0022(6) 0.0047(6)
 C14 0.0184(8) 0.0217(9) 0.0186(9) 0.0063(7) -0.0006(7) 0.0071(7)
 C15 0.0195(8) 0.0211(9) 0.0158(8) 0.0019(7) 0.0000(7) 0.0061(7)
 C16 0.0219(9) 0.0194(9) 0.0203(9) 0.0009(7) 0.0002(7) 0.0054(7)
 C17 0.0204(9) 0.0217(9) 0.0183(9) 0.0050(7) 0.0002(7) 0.0068(7)
 C18 0.0170(8) 0.0178(8) 0.0177(8) 0.0058(7) 0.0035(6) 0.0052(7)
 C19 0.0181(8) 0.0187(8) 0.0205(9) 0.0037(7) 0.0019(7) 0.0050(7)
 C20 0.0164(8) 0.0225(9) 0.0220(9) 0.0060(7) 0.0009(7) 0.0055(7)
 C21 0.0232(9) 0.0194(9) 0.0170(9) 0.0016(7) 0.0020(7) 0.0075(7)
 C22 0.0222(9) 0.0169(8) 0.0206(9) 0.0041(7) 0.0031(7) 0.0080(7)
 C23 0.0174(8) 0.0183(8) 0.0177(8) 0.0060(7) 0.0022(6) 0.0034(7)
 C24 0.0229(9) 0.0198(9) 0.0159(8) 0.0025(7) 0.0021(7) 0.0064(7)
 C25 0.0234(9) 0.0189(8) 0.0184(9) 0.0039(7) 0.0040(7) 0.0085(7)
 C26 0.0173(8) 0.0160(8) 0.0190(9) 0.0062(7) 0.0011(7) 0.0026(7)
 C27 0.0206(9) 0.0197(9) 0.0197(9) 0.0043(7) 0.0042(7) 0.0059(7)
 C28 0.0200(9) 0.0209(9) 0.0250(10) 0.0068(8) 0.0043(7) 0.0079(7)
 C29 0.0222(9) 0.0196(9) 0.0186(9) 0.0047(7) 0.0023(7) 0.0057(7)
 C30 0.0200(8) 0.0188(8) 0.0201(9) 0.0066(7) 0.0017(7) 0.0061(7)

_geom_special_details             
;
 All esds (except the esd in the dihedral angle between two l.s. planes)
 are estimated using the full covariance matrix. The cell esds are taken
 into account individually in the estimation of esds in distances, angles
 and torsion angles correlations between esds in cell parameters are only
 used when they are defined by crystal symmetry. An approximate (isotropic)
 treatment of cell esds is used for estimating esds involving l.s. planes.
;
  
loop_
  _geom_bond_atom_site_label_1
  _geom_bond_atom_site_label_2
  _geom_bond_distance
  _geom_bond_site_symmetry_2
  _geom_bond_publ_flag
 Cu1 O1 1.9759(12) 2 ?
 Cu1 O1 1.9759(12) . ?
 Cu1 O3 1.9790(12) . ?
 Cu1 O3 1.9791(12) 2 ?
 Cu1 O5 2.3151(13) . ?
 Cu1 O5 2.3151(13) 2 ?
 C1 N1 1.351(2) . ?
 C1 C2 1.378(2) . ?
 N1 O3 1.3333(18) . ?
 N1 C5 1.354(2) . ?
 O1 N3 1.3384(17) . ?
 B1 F4 1.384(2) . ?
 B1 F3 1.388(3) . ?
 B1 F1 1.393(3) . ?
 B1 F2 1.397(2) . ?
 C2 C3 1.397(2) . ?
 N2 O4 1.2980(19) . ?
 N2 C9 1.358(2) . ?
 N2 C8 1.366(2) . ?
 O2 N4 1.3055(18) . ?
 C3 C4 1.396(2) . ?
 C3 C6 1.482(2) . ?
 N3 C15 1.348(2) . ?
 N3 C11 1.349(2) . ?
 C4 C5 1.375(2) . ?
 N4 C20 1.358(2) . ?
 N4 C16 1.362(2) . ?
 N5 O5 1.3172(18) . ?
 N5 C25 1.352(2) . ?
 N5 C21 1.355(2) . ?
 C6 C7 1.398(2) . ?
 C6 C10 1.398(2) . ?
 N6 O6 1.3034(19) . ?
 N6 C29 1.357(2) . ?
 N6 C28 1.361(2) . ?
 C7 C8 1.373(3) . ?
 C9 C10 1.373(2) . ?
 C11 C12 1.379(2) . ?
 C12 C13 1.401(2) . ?
 C13 C14 1.394(2) . ?
 C13 C18 1.478(2) . ?
 C14 C15 1.373(2) . ?
 C16 C17 1.373(2) . ?
 C17 C18 1.398(2) . ?
 C18 C19 1.398(2) . ?
 C19 C20 1.373(2) . ?
 C21 C22 1.376(2) . ?
 C22 C23 1.395(2) . ?
 C23 C24 1.402(2) . ?
 C23 C26 1.476(2) . ?
 C24 C25 1.374(2) . ?
 C26 C30 1.397(2) . ?
 C26 C27 1.399(2) . ?
 C27 C28 1.370(2) . ?
 C29 C30 1.372(2) . ?

loop_
  _geom_angle_atom_site_label_1
  _geom_angle_atom_site_label_2
  _geom_angle_atom_site_label_3
  _geom_angle
  _geom_angle_site_symmetry_1
  _geom_angle_site_symmetry_3
  _geom_angle_publ_flag
 O1 Cu1 O1 180.00(8) 2 . ?
 O1 Cu1 O3 90.58(5) 2 . ?
 O1 Cu1 O3 89.42(5) . . ?
 O1 Cu1 O3 89.42(5) 2 2 ?
 O1 Cu1 O3 90.58(5) . 2 ?
 O3 Cu1 O3 180.00(7) . 2 ?
 O1 Cu1 O5 95.70(5) 2 . ?
 O1 Cu1 O5 84.30(5) . . ?
 O3 Cu1 O5 84.99(5) . . ?
 O3 Cu1 O5 95.01(5) 2 . ?
 O1 Cu1 O5 84.30(5) 2 2 ?
 O1 Cu1 O5 95.70(5) . 2 ?
 O3 Cu1 O5 95.01(5) . 2 ?
 O3 Cu1 O5 84.99(5) 2 2 ?
 O5 Cu1 O5 180.00(6) . 2 ?
 N1 C1 C2 119.91(16) . . ?
 O3 N1 C1 122.31(14) . . ?
 O3 N1 C5 116.72(14) . . ?
 C1 N1 C5 120.91(15) . . ?
 N3 O1 Cu1 124.40(10) . . ?
 F4 B1 F3 110.44(18) . . ?
 F4 B1 F1 109.46(18) . . ?
 F3 B1 F1 108.70(18) . . ?
 F4 B1 F2 109.98(17) . . ?
 F3 B1 F2 109.60(17) . . ?
 F1 B1 F2 108.62(18) . . ?
 C1 C2 C3 121.23(16) . . ?
 O4 N2 C9 120.38(15) . . ?
 O4 N2 C8 120.99(15) . . ?
 C9 N2 C8 118.63(15) . . ?
 C4 C3 C2 116.58(16) . . ?
 C4 C3 C6 121.30(15) . . ?
 C2 C3 C6 121.97(16) . . ?
 O1 N3 C15 117.43(14) . . ?
 O1 N3 C11 121.28(14) . . ?
 C15 N3 C11 121.24(15) . . ?
 N1 O3 Cu1 128.01(10) . . ?
 C5 C4 C3 121.19(16) . . ?
 O2 N4 C20 120.56(15) . . ?
 O2 N4 C16 120.26(15) . . ?
 C20 N4 C16 119.18(15) . . ?
 N1 C5 C4 120.03(16) . . ?
 O5 N5 C25 118.98(14) . . ?
 O5 N5 C21 120.91(14) . . ?
 C25 N5 C21 120.11(15) . . ?
 N5 O5 Cu1 124.22(10) . . ?
 C7 C6 C10 116.06(16) . . ?
 C7 C6 C3 123.51(16) . . ?
 C10 C6 C3 120.21(16) . . ?
 O6 N6 C29 120.70(15) . . ?
 O6 N6 C28 120.58(15) . . ?
 C29 N6 C28 118.72(15) . . ?
 C8 C7 C6 121.57(17) . . ?
 N2 C8 C7 120.96(17) . . ?
 N2 C9 C10 121.63(17) . . ?
 C9 C10 C6 121.12(17) . . ?
 N3 C11 C12 119.99(16) . . ?
 C11 C12 C13 120.54(16) . . ?
 C14 C13 C12 117.14(16) . . ?
 C14 C13 C18 120.72(15) . . ?
 C12 C13 C18 122.12(15) . . ?
 C15 C14 C13 120.87(16) . . ?
 N3 C15 C14 120.16(16) . . ?
 N4 C16 C17 121.26(16) . . ?
 C16 C17 C18 120.71(16) . . ?
 C17 C18 C19 116.84(16) . . ?
 C17 C18 C13 121.61(15) . . ?
 C19 C18 C13 121.52(15) . . ?
 C20 C19 C18 120.95(17) . . ?
 N4 C20 C19 121.07(16) . . ?
 N5 C21 C22 120.45(16) . . ?
 C21 C22 C23 121.24(16) . . ?
 C22 C23 C24 116.46(15) . . ?
 C22 C23 C26 122.48(16) . . ?
 C24 C23 C26 121.05(15) . . ?
 C25 C24 C23 120.94(16) . . ?
 N5 C25 C24 120.79(16) . . ?
 C30 C26 C27 115.89(16) . . ?
 C30 C26 C23 121.86(15) . . ?
 C27 C26 C23 122.25(16) . . ?
 C28 C27 C26 121.24(17) . . ?
 N6 C28 C27 121.43(16) . . ?
 N6 C29 C30 121.16(17) . . ?
 C29 C30 C26 121.54(16) . . ?

_diffrn_measured_fraction_theta_max 0.979
_diffrn_reflns_theta_full         27.50
_diffrn_measured_fraction_theta_full 0.979

_refine_diff_density_max          0.41
_refine_diff_density_min         -0.33
_refine_diff_density_rms          0.06

#===END of CIF

data_compound_11_CDBZA2

_refine_special_details           
;
 A disordered nitrate anion was modelled in two parts with
 refined occupancies in the ratio 0.689(6):0.311(6).
;
  
_audit_creation_method            'enCIFer editing of SHELXL97 CIF output'
_chemical_name_systematic         '?'
_chemical_name_common             ?
_chemical_melting_point           ?
_chemical_formula_moiety          'C60 H48 Cd N12 O12, 2(N O3)'
_chemical_formula_sum             'C60 H48 Cd N14 O18'
_chemical_formula_weight          1365.52
  
loop_
  _atom_type_symbol
  _atom_type_description
  _atom_type_scat_dispersion_real
  _atom_type_scat_dispersion_imag
  _atom_type_scat_source
 'C' 'C' 0.0033 0.0016 'International Tables Vol C Tables 4.2.6.8 and 6.1.1.4'
 'H' 'H' 0.0000 0.0000 'International Tables Vol C Tables 4.2.6.8 and 6.1.1.4'
 'N' 'N' 0.0061 0.0033 'International Tables Vol C Tables 4.2.6.8 and 6.1.1.4'
 'O' 'O' 0.0106 0.0060 'International Tables Vol C Tables 4.2.6.8 and 6.1.1.4'
'Cd' 'Cd' -0.8075 1.2024 'International Tables Vol C Tables 4.2.6.8 and 6.1.1.4'

_symmetry_cell_setting            Triclinic
_symmetry_space_group_name_H-M    P-1
  
loop_
  _symmetry_equiv_pos_as_xyz
 'x, y, z'
 '-x, -y, -z'

_cell_length_a                    8.8749(13)
_cell_length_b                    11.779(2)
_cell_length_c                    13.969(2)
_cell_angle_alpha                 104.179(2)
_cell_angle_beta                  95.648(2)
_cell_angle_gamma                 98.822(2)
_cell_volume                      1384.9(6)
_cell_formula_units_Z             1
_cell_measurement_temperature     150(2)
_cell_measurement_reflns_used     7781
_cell_measurement_theta_min       2.36
_cell_measurement_theta_max       27.48
  
_exptl_crystal_description        TABLET
_exptl_crystal_colour             COLOURLESS
_exptl_crystal_size_max           0.37
_exptl_crystal_size_mid           0.33
_exptl_crystal_size_min           0.10
_exptl_crystal_density_meas       ?
_exptl_crystal_density_diffrn     1.637
_exptl_crystal_density_method     'not measured'
_exptl_crystal_F_000              698
_exptl_absorpt_coefficient_mu     0.488
_exptl_absorpt_correction_type    multi-scan
_exptl_absorpt_correction_T_min   0.8698
_exptl_absorpt_correction_T_max   1.0000
_exptl_absorpt_process_details   '(SADABS; Bruker, 2001)'
  
_exptl_special_details            .
  
_diffrn_ambient_temperature       150(2)
_diffrn_radiation_wavelength      0.71073
_diffrn_radiation_type            MoK\a
_diffrn_radiation_source          'normal-focus sealed tube'
_diffrn_radiation_monochromator   graphite
_diffrn_measurement_device_type   'Bruker SMART APEX CCD area detector'
_diffrn_measurement_method        omega
_diffrn_detector_area_resol_mean  ?
_diffrn_standards_number          0
_diffrn_standards_interval_count  .
_diffrn_standards_interval_time   ?
_diffrn_standards_decay_%         0
_diffrn_reflns_number             12190
_diffrn_reflns_av_R_equivalents   0.015
_diffrn_reflns_av_sigmaI/netI     0.021
_diffrn_reflns_limit_h_min        -11
_diffrn_reflns_limit_h_max        11
_diffrn_reflns_limit_k_min        -15
_diffrn_reflns_limit_k_max        15
_diffrn_reflns_limit_l_min        -18
_diffrn_reflns_limit_l_max        18
_diffrn_reflns_theta_min          2.04
_diffrn_reflns_theta_max          27.47
_reflns_number_total              6244
_reflns_number_gt                 6001
_reflns_threshold_expression      >2sigma(I)
  
_computing_data_collection        'Bruker SMART version 5.625 (Bruker, 2001)'
_computing_cell_refinement        'Bruker SAINT version 6.36A (Bruker, 2000)'
_computing_data_reduction         'Bruker SAINT; SHELXTL (Sheldrick, 2008)' 
_computing_structure_solution     'SHELXS97 (Sheldrick, 2008)' 
_computing_structure_refinement   'SHELXL97 (Sheldrick, 2008)' 
_computing_molecular_graphics     'Bruker SHELXTL'
_computing_publication_material   'enCIFer(Allen et al.,2004) PLATON(Spek,2003)'
  
_refine_ls_structure_factor_coef  Fsqd
_refine_ls_matrix_type            full
_refine_ls_weighting_scheme       calc
_refine_ls_weighting_details      
;
calc w=1/[\s^2^(Fo^2^)+(0.049P)^2^+0.640P] where P=(Fo^2^+2Fc^2^)/3
;
_atom_sites_solution_primary      direct
_atom_sites_solution_secondary    difmap
_atom_sites_solution_hydrogens    geom
_refine_ls_hydrogen_treatment     'riding model'
_refine_ls_extinction_method      none
_refine_ls_extinction_coef        ?
_refine_ls_number_reflns          6244
_refine_ls_number_parameters      444
_refine_ls_number_restraints      30
_refine_ls_R_factor_all           0.0328
_refine_ls_R_factor_gt            0.0312
_refine_ls_wR_factor_ref          0.0821
_refine_ls_wR_factor_gt           0.0811
_refine_ls_goodness_of_fit_ref    1.07
_refine_ls_restrained_S_all       1.08
_refine_ls_shift/su_max           0.001
_refine_ls_shift/su_mean          0.000
  
loop_
  _atom_site_label
  _atom_site_type_symbol
  _atom_site_fract_x
  _atom_site_fract_y
  _atom_site_fract_z
  _atom_site_U_iso_or_equiv
  _atom_site_adp_type
  _atom_site_occupancy
  _atom_site_symmetry_multiplicity
  _atom_site_calc_flag
  _atom_site_refinement_flags
  _atom_site_disorder_assembly
  _atom_site_disorder_group
 Cd1 Cd 0.0000 0.5000 0.5000 0.02085(7) Uani 1 2 d S . .
 O1 O -0.08638(16) 0.47428(13) 0.64336(10) 0.0312(3) Uani 1 1 d . . .
 O2 O 0.56466(19) 0.34309(17) 1.18821(12) 0.0459(4) Uani 1 1 d . . .
 O3 O -0.01648(17) 0.30097(11) 0.45850(10) 0.0308(3) Uani 1 1 d . . .
 O4 O -0.19918(19) -0.24247(14) -0.19866(11) 0.0407(4) Uani 1 1 d . . .
 O5 O 0.24889(15) 0.52594(12) 0.55974(11) 0.0317(3) Uani 1 1 d . . .
 O6 O 0.82306(17) -0.11510(13) 0.41412(12) 0.0374(3) Uani 1 1 d . . .
 C1 C 0.0285(2) 0.53407(17) 0.80684(14) 0.0280(4) Uani 1 1 d . . .
 H1A H -0.0219 0.6007 0.8170 0.034 Uiso 1 1 calc R . .
 C2 C 0.1220(2) 0.51800(17) 0.88459(14) 0.0285(4) Uani 1 1 d . . .
 H2A H 0.1363 0.5739 0.9481 0.034 Uiso 1 1 calc R . .
 C3 C 0.1967(2) 0.42008(16) 0.87147(14) 0.0252(4) Uani 1 1 d . . .
 C4 C 0.1716(2) 0.34142(17) 0.77652(14) 0.0281(4) Uani 1 1 d . . .
 H4A H 0.2197 0.2735 0.7646 0.034 Uiso 1 1 calc R . .
 C5 C 0.0782(2) 0.36074(17) 0.69989(14) 0.0287(4) Uani 1 1 d . . .
 H5A H 0.0633 0.3069 0.6354 0.034 Uiso 1 1 calc R . .
 C6 C 0.3764(2) 0.43571(19) 1.13162(16) 0.0334(4) Uani 1 1 d . . .
 H6A H 0.3657 0.4732 1.1984 0.040 Uiso 1 1 calc R . .
 C7 C 0.2868(2) 0.45675(17) 1.05423(15) 0.0296(4) Uani 1 1 d . . .
 H7A H 0.2167 0.5099 1.0684 0.036 Uiso 1 1 calc R . .
 C8 C 0.2968(2) 0.40157(17) 0.95496(14) 0.0271(4) Uani 1 1 d . . .
 C9 C 0.4057(2) 0.32732(18) 0.93970(16) 0.0316(4) Uani 1 1 d . . .
 H9A H 0.4179 0.2883 0.8736 0.038 Uiso 1 1 calc R . .
 C10 C 0.4952(2) 0.3100(2) 1.01880(17) 0.0356(4) Uani 1 1 d . . .
 H10A H 0.5696 0.2602 1.0064 0.043 Uiso 1 1 calc R . .
 C11 C -0.1621(2) 0.24115(17) 0.30172(15) 0.0299(4) Uani 1 1 d . . .
 H11A H -0.2104 0.3088 0.3167 0.036 Uiso 1 1 calc R . .
 C12 C -0.2013(2) 0.15928(18) 0.20931(15) 0.0306(4) Uani 1 1 d . . .
 H12A H -0.2762 0.1714 0.1612 0.037 Uiso 1 1 calc R . .
 C13 C -0.1322(2) 0.05922(17) 0.18580(15) 0.0286(4) Uani 1 1 d . . .
 C14 C -0.0271(2) 0.04447(18) 0.26123(15) 0.0316(4) Uani 1 1 d . . .
 H14A H 0.0192 -0.0243 0.2494 0.038 Uiso 1 1 calc R . .
 C15 C 0.0102(2) 0.12683(17) 0.35118(15) 0.0307(4) Uani 1 1 d . . .
 H15A H 0.0830 0.1156 0.4010 0.037 Uiso 1 1 calc R . .
 C16 C -0.2785(3) -0.0894(2) -0.08719(16) 0.0391(5) Uani 1 1 d . . .
 H16A H -0.3515 -0.0816 -0.1385 0.047 Uiso 1 1 calc R . .
 C17 C -0.2651(3) -0.01478(19) 0.00693(17) 0.0371(5) Uani 1 1 d . . .
 H17A H -0.3277 0.0444 0.0192 0.045 Uiso 1 1 calc R . .
 C18 C -0.1607(2) -0.02451(17) 0.08509(15) 0.0300(4) Uani 1 1 d . . .
 C19 C -0.0738(2) -0.11405(18) 0.06047(15) 0.0320(4) Uani 1 1 d . . .
 H19A H -0.0026 -0.1256 0.1110 0.038 Uiso 1 1 calc R . .
 C20 C -0.0884(3) -0.18530(19) -0.03416(16) 0.0350(4) Uani 1 1 d . . .
 H20A H -0.0259 -0.2443 -0.0482 0.042 Uiso 1 1 calc R . .
 C21 C 0.3219(2) 0.37640(17) 0.43986(14) 0.0277(4) Uani 1 1 d . . .
 H21A H 0.2595 0.3945 0.3884 0.033 Uiso 1 1 calc R . .
 C22 C 0.4055(2) 0.28645(17) 0.41675(14) 0.0267(4) Uani 1 1 d . . .
 H22A H 0.4004 0.2428 0.3492 0.032 Uiso 1 1 calc R . .
 C23 C 0.4977(2) 0.25877(16) 0.49159(14) 0.0239(3) Uani 1 1 d . . .
 C24 C 0.5047(2) 0.32793(17) 0.58908(14) 0.0271(4) Uani 1 1 d . . .
 H24A H 0.5688 0.3134 0.6417 0.032 Uiso 1 1 calc R . .
 C25 C 0.4197(2) 0.41684(18) 0.60974(14) 0.0279(4) Uani 1 1 d . . .
 H25A H 0.4248 0.4631 0.6765 0.033 Uiso 1 1 calc R . .
 C26 C 0.6132(2) -0.03318(17) 0.37293(15) 0.0294(4) Uani 1 1 d . . .
 H26A H 0.5756 -0.1015 0.3187 0.035 Uiso 1 1 calc R . .
 C27 C 0.5323(2) 0.05900(17) 0.38999(14) 0.0270(4) Uani 1 1 d . . .
 H27A H 0.4402 0.0538 0.3470 0.032 Uiso 1 1 calc R . .
 C28 C 0.5841(2) 0.16012(16) 0.46978(13) 0.0240(3) Uani 1 1 d . . .
 C29 C 0.7200(2) 0.16231(17) 0.53057(14) 0.0263(4) Uani 1 1 d . . .
 H29A H 0.7584 0.2289 0.5862 0.032 Uiso 1 1 calc R . .
 C30 C 0.7989(2) 0.06933(17) 0.51075(15) 0.0279(4) Uani 1 1 d . . .
 H30A H 0.8919 0.0731 0.5524 0.033 Uiso 1 1 calc R . .
 N1 N 0.00747(18) 0.45597(14) 0.71584(11) 0.0256(3) Uani 1 1 d . . .
 N2 N 0.4799(2) 0.36236(16) 1.11428(14) 0.0341(4) Uani 1 1 d . . .
 N3 N -0.05622(19) 0.22518(14) 0.37011(12) 0.0279(3) Uani 1 1 d . . .
 N4 N -0.1900(2) -0.17385(16) -0.10858(13) 0.0350(4) Uani 1 1 d . . .
 N5 N 0.32876(17) 0.43869(14) 0.53552(12) 0.0262(3) Uani 1 1 d . . .
 N6 N 0.74601(18) -0.02788(14) 0.43258(13) 0.0277(3) Uani 1 1 d . . .
 N1S N 0.2592(2) 0.77888(18) 0.17117(15) 0.0456(5) Uani 1 1 d D . .
 O1SA O 0.3378(8) 0.7219(5) 0.2118(3) 0.0746(17) Uani 0.689(6) 1 d PD A 1
 O1SB O 0.1921(10) 0.7370(6) 0.0853(4) 0.060(2) Uani 0.689(6) 1 d PD A 1
 O1SC O 0.2401(4) 0.8778(3) 0.2219(2) 0.0750(14) Uani 0.689(6) 1 d PD A 1
 O2SA O 0.2809(15) 0.7141(10) 0.2264(8) 0.089(5) Uani 0.311(6) 1 d PD A 2
 O2SB O 0.171(2) 0.7368(13) 0.0910(9) 0.076(7) Uani 0.311(6) 1 d PD A 2
 O2SC O 0.3718(8) 0.8624(6) 0.1717(6) 0.080(3) Uiso 0.311(6) 1 d PD A 2

loop_
  _atom_site_aniso_label
  _atom_site_aniso_U_11
  _atom_site_aniso_U_22
  _atom_site_aniso_U_33
  _atom_site_aniso_U_23
  _atom_site_aniso_U_13
  _atom_site_aniso_U_12
 Cd1 0.02260(10) 0.01890(10) 0.01967(10) 0.00175(6) -0.00112(6) 0.00769(6)
 O1 0.0315(7) 0.0433(8) 0.0211(6) 0.0089(6) 0.0007(5) 0.0157(6)
 O2 0.0386(9) 0.0614(11) 0.0400(9) 0.0229(8) -0.0095(7) 0.0101(8)
 O3 0.0430(8) 0.0192(6) 0.0261(7) -0.0002(5) 0.0008(6) 0.0066(5)
 O4 0.0499(9) 0.0396(8) 0.0242(7) -0.0006(6) 0.0051(6) -0.0022(7)
 O5 0.0252(7) 0.0266(7) 0.0368(8) -0.0049(6) -0.0049(6) 0.0126(5)
 O6 0.0352(8) 0.0267(7) 0.0515(9) 0.0066(7) 0.0056(7) 0.0162(6)
 C1 0.0336(10) 0.0261(9) 0.0255(9) 0.0052(7) 0.0055(7) 0.0105(7)
 C2 0.0353(10) 0.0255(9) 0.0229(9) 0.0027(7) 0.0024(7) 0.0076(8)
 C3 0.0265(9) 0.0239(9) 0.0250(9) 0.0072(7) 0.0022(7) 0.0036(7)
 C4 0.0324(10) 0.0251(9) 0.0264(9) 0.0044(7) 0.0030(7) 0.0093(7)
 C5 0.0328(10) 0.0275(9) 0.0235(9) 0.0007(7) 0.0019(7) 0.0093(8)
 C6 0.0358(11) 0.0318(10) 0.0292(10) 0.0082(8) -0.0027(8) 0.0007(8)
 C7 0.0323(10) 0.0264(9) 0.0285(9) 0.0075(8) -0.0011(7) 0.0035(7)
 C8 0.0281(9) 0.0245(9) 0.0278(9) 0.0090(7) 0.0003(7) 0.0011(7)
 C9 0.0309(10) 0.0331(10) 0.0327(10) 0.0117(8) 0.0048(8) 0.0062(8)
 C10 0.0287(10) 0.0383(11) 0.0424(12) 0.0164(9) 0.0020(8) 0.0070(8)
 C11 0.0327(10) 0.0241(9) 0.0335(10) 0.0059(8) 0.0068(8) 0.0085(7)
 C12 0.0307(10) 0.0304(10) 0.0289(10) 0.0045(8) 0.0016(7) 0.0071(8)
 C13 0.0307(9) 0.0247(9) 0.0284(9) 0.0047(7) 0.0055(7) 0.0019(7)
 C14 0.0382(11) 0.0249(9) 0.0325(10) 0.0064(8) 0.0056(8) 0.0101(8)
 C15 0.0365(10) 0.0268(9) 0.0303(10) 0.0092(8) 0.0034(8) 0.0085(8)
 C16 0.0450(12) 0.0361(11) 0.0311(11) 0.0064(9) -0.0018(9) 0.0008(9)
 C17 0.0416(12) 0.0308(10) 0.0354(11) 0.0031(9) 0.0010(9) 0.0078(9)
 C18 0.0330(10) 0.0256(9) 0.0289(10) 0.0045(8) 0.0055(8) 0.0018(7)
 C19 0.0365(10) 0.0280(10) 0.0297(10) 0.0043(8) 0.0060(8) 0.0054(8)
 C20 0.0387(11) 0.0315(10) 0.0324(10) 0.0045(8) 0.0071(8) 0.0043(8)
 C21 0.0249(9) 0.0308(10) 0.0265(9) 0.0052(7) -0.0008(7) 0.0090(7)
 C22 0.0250(9) 0.0295(9) 0.0243(9) 0.0035(7) 0.0016(7) 0.0083(7)
 C23 0.0199(8) 0.0251(9) 0.0263(9) 0.0051(7) 0.0028(6) 0.0062(7)
 C24 0.0233(9) 0.0319(10) 0.0249(9) 0.0052(7) -0.0015(7) 0.0084(7)
 C25 0.0235(9) 0.0311(9) 0.0246(9) -0.0003(7) -0.0023(7) 0.0075(7)
 C26 0.0310(10) 0.0256(9) 0.0300(9) 0.0043(8) 0.0025(7) 0.0066(7)
 C27 0.0260(9) 0.0286(9) 0.0260(9) 0.0059(7) 0.0012(7) 0.0069(7)
 C28 0.0222(8) 0.0260(9) 0.0249(9) 0.0074(7) 0.0038(7) 0.0068(7)
 C29 0.0221(8) 0.0275(9) 0.0280(9) 0.0046(7) 0.0023(7) 0.0061(7)
 C30 0.0226(8) 0.0294(9) 0.0319(10) 0.0077(8) 0.0020(7) 0.0073(7)
 N1 0.0267(8) 0.0295(8) 0.0213(7) 0.0067(6) 0.0024(6) 0.0083(6)
 N2 0.0282(8) 0.0386(10) 0.0359(9) 0.0173(8) -0.0043(7) 0.0004(7)
 N3 0.0346(9) 0.0223(7) 0.0249(8) 0.0032(6) 0.0060(6) 0.0030(6)
 N4 0.0398(10) 0.0311(9) 0.0293(9) 0.0037(7) 0.0072(7) -0.0027(7)
 N5 0.0207(7) 0.0244(8) 0.0307(8) 0.0012(6) -0.0001(6) 0.0078(6)
 N6 0.0273(8) 0.0235(8) 0.0348(9) 0.0082(7) 0.0065(6) 0.0096(6)
 N1S 0.0446(11) 0.0465(11) 0.0402(11) 0.0027(9) -0.0089(9) 0.0156(9)
 O1SA 0.111(4) 0.092(3) 0.032(2) 0.0077(18) 0.001(2) 0.072(3)
 O1SB 0.067(3) 0.068(4) 0.038(3) -0.010(3) -0.018(2) 0.042(3)
 O1SC 0.098(3) 0.0495(17) 0.0565(19) -0.0206(14) -0.0365(17) 0.0374(17)
 O2SA 0.161(14) 0.095(7) 0.046(5) 0.035(5) 0.045(7) 0.078(8)
 O2SB 0.062(8) 0.067(9) 0.066(9) -0.046(7) -0.031(6) 0.038(6)

_geom_special_details             
;
 All esds (except the esd in the dihedral angle between two l.s. planes)
 are estimated using the full covariance matrix. The cell esds are taken
 into account individually in the estimation of esds in distances, angles
 and torsion angles correlations between esds in cell parameters are only
 used when they are defined by crystal symmetry. An approximate (isotropic)
 treatment of cell esds is used for estimating esds involving l.s. planes.
;
  
loop_
  _geom_bond_atom_site_label_1
  _geom_bond_atom_site_label_2
  _geom_bond_distance
  _geom_bond_site_symmetry_2
  _geom_bond_publ_flag
 Cd1 O1 2.2844(14) . ?
 Cd1 O3 2.2508(13) . ?
 Cd1 O5 2.2303(13) . ?
 O1 N1 1.327(2) . ?
 O2 N2 1.303(2) . ?
 O3 N3 1.313(2) . ?
 O4 N4 1.306(2) . ?
 O5 N5 1.3317(19) . ?
 O6 N6 1.308(2) . ?
 C1 N1 1.351(2) . ?
 C1 C2 1.369(3) . ?
 C2 C3 1.399(3) . ?
 C3 C4 1.394(3) . ?
 C3 C8 1.475(3) . ?
 C4 C5 1.374(3) . ?
 C5 N1 1.350(2) . ?
 C6 N2 1.354(3) . ?
 C6 C7 1.373(3) . ?
 C7 C8 1.398(3) . ?
 C8 C9 1.398(3) . ?
 C9 C10 1.371(3) . ?
 C10 N2 1.355(3) . ?
 C11 N3 1.341(3) . ?
 C11 C12 1.384(3) . ?
 C12 C13 1.395(3) . ?
 C13 C14 1.399(3) . ?
 C13 C18 1.480(3) . ?
 C14 C15 1.361(3) . ?
 C15 N3 1.360(2) . ?
 C16 N4 1.355(3) . ?
 C16 C17 1.373(3) . ?
 C17 C18 1.399(3) . ?
 C18 C19 1.396(3) . ?
 C19 C20 1.363(3) . ?
 C20 N4 1.354(3) . ?
 C21 N5 1.348(2) . ?
 C21 C22 1.378(3) . ?
 C22 C23 1.396(3) . ?
 C23 C24 1.395(3) . ?
 C23 C28 1.475(2) . ?
 C24 C25 1.374(3) . ?
 C25 N5 1.350(2) . ?
 C26 N6 1.359(3) . ?
 C26 C27 1.377(3) . ?
 C27 C28 1.398(3) . ?
 C28 C29 1.398(3) . ?
 C29 C30 1.375(3) . ?
 C30 N6 1.359(3) . ?
 N1S O1SA 1.230(4) . ?
 N1S O1SB 1.231(4) . ?
 N1S O2SA 1.233(6) . ?
 N1S O2SB 1.245(6) . ?
 N1S O1SC 1.252(3) . ?
 N1S O2SC 1.288(6) . ?

loop_
  _geom_angle_atom_site_label_1
  _geom_angle_atom_site_label_2
  _geom_angle_atom_site_label_3
  _geom_angle
  _geom_angle_site_symmetry_1
  _geom_angle_site_symmetry_3
  _geom_angle_publ_flag
 O1 Cd1 O3 84.74(5) . . ?
 O1 Cd1 O5 94.92(5) . . ?
 O3 Cd1 O5 90.70(5) . . ?
 N1 O1 Cd1 120.99(11) . . ?
 N3 O3 Cd1 128.50(11) . . ?
 N5 O5 Cd1 121.12(10) . . ?
 N1 C1 C2 120.56(17) . . ?
 C1 C2 C3 120.68(17) . . ?
 C4 C3 C2 116.97(17) . . ?
 C4 C3 C8 121.97(17) . . ?
 C2 C3 C8 121.06(17) . . ?
 C5 C4 C3 120.89(17) . . ?
 N1 C5 C4 120.28(17) . . ?
 N2 C6 C7 121.0(2) . . ?
 C6 C7 C8 121.35(19) . . ?
 C7 C8 C9 116.12(18) . . ?
 C7 C8 C3 121.70(18) . . ?
 C9 C8 C3 122.18(18) . . ?
 C10 C9 C8 120.9(2) . . ?
 N2 C10 C9 121.5(2) . . ?
 N3 C11 C12 120.11(18) . . ?
 C11 C12 C13 120.92(18) . . ?
 C12 C13 C14 116.57(18) . . ?
 C12 C13 C18 122.46(18) . . ?
 C14 C13 C18 120.89(18) . . ?
 C15 C14 C13 121.24(18) . . ?
 N3 C15 C14 120.35(18) . . ?
 N4 C16 C17 121.6(2) . . ?
 C16 C17 C18 121.0(2) . . ?
 C19 C18 C17 115.60(19) . . ?
 C19 C18 C13 120.75(18) . . ?
 C17 C18 C13 123.46(19) . . ?
 C20 C19 C18 121.8(2) . . ?
 N4 C20 C19 121.5(2) . . ?
 N5 C21 C22 119.98(17) . . ?
 C21 C22 C23 120.64(17) . . ?
 C24 C23 C22 117.31(16) . . ?
 C24 C23 C28 120.71(16) . . ?
 C22 C23 C28 121.98(16) . . ?
 C25 C24 C23 120.62(17) . . ?
 N5 C25 C24 120.19(17) . . ?
 N6 C26 C27 120.99(18) . . ?
 C26 C27 C28 120.79(17) . . ?
 C27 C28 C29 116.90(17) . . ?
 C27 C28 C23 122.02(16) . . ?
 C29 C28 C23 121.05(17) . . ?
 C30 C29 C28 120.82(18) . . ?
 N6 C30 C29 121.05(17) . . ?
 O1 N1 C5 121.09(15) . . ?
 O1 N1 C1 118.28(15) . . ?
 C5 N1 C1 120.62(16) . . ?
 O2 N2 C6 120.59(19) . . ?
 O2 N2 C10 120.38(19) . . ?
 C6 N2 C10 119.03(17) . . ?
 O3 N3 C11 121.72(16) . . ?
 O3 N3 C15 117.52(16) . . ?
 C11 N3 C15 120.72(17) . . ?
 O4 N4 C20 119.80(19) . . ?
 O4 N4 C16 121.72(19) . . ?
 C20 N4 C16 118.48(18) . . ?
 O5 N5 C21 121.10(15) . . ?
 O5 N5 C25 117.67(15) . . ?
 C21 N5 C25 121.20(16) . . ?
 O6 N6 C30 120.35(16) . . ?
 O6 N6 C26 120.20(16) . . ?
 C30 N6 C26 119.45(16) . . ?
 O1SA N1S O1SB 121.3(4) . . ?
 O1SA N1S O1SC 118.1(3) . . ?
 O1SB N1S O1SC 120.4(4) . . ?
 O2SA N1S O2SB 119.2(6) . . ?
 O2SA N1S O2SC 117.2(6) . . ?
 O2SB N1S O2SC 116.0(7) . . ?

_diffrn_measured_fraction_theta_max  0.980
_diffrn_reflns_theta_full            27.47
_diffrn_measured_fraction_theta_full 0.980

_refine_diff_density_max          0.92
_refine_diff_density_min         -0.20
_refine_diff_density_rms          0.07

#===END of CIF

  
data_compound_12_cusifn 

_refine_special_details 
; 
Twinning by 180 degree rotation about 1 0 0 direction was integrated 
using two matrixes: twinabs matrix (1 0 0.28/0 -1 0/ 0 0 -1),
Rint from 1 component. This twinning accounts for the apparently low
completeness calculated for the dataset.

H atoms of coordinated and solvate water molecules, solvate methanol
molecules cannot be located, but they have been included in the formula,
formula weight, etc.
; 
  
_audit_creation_method         'enCIFer editing of SHELXL97 CIF output' 
_chemical_name_systematic 
; 
 ? 
; 
_chemical_name_common             ? 
_chemical_melting_point           ? 
_chemical_formula_moiety         'Cu C20 H20 N4 O6, H2 O, C H4 O, Si F6' 
_chemical_formula_sum            'C21 H26 Cu F6 N4 O8 Si' 
_chemical_formula_weight          668.09 
  
loop_ 
 _atom_type_symbol 
 _atom_type_description 
 _atom_type_scat_dispersion_real 
 _atom_type_scat_dispersion_imag 
 _atom_type_scat_source 
 'C'  'C'   0.0033   0.0016 
 'International Tables Vol C Tables 4.2.6.8 and 6.1.1.4' 
 'H'  'H'   0.0000   0.0000 
 'International Tables Vol C Tables 4.2.6.8 and 6.1.1.4' 
 'N'  'N'   0.0061   0.0033 
 'International Tables Vol C Tables 4.2.6.8 and 6.1.1.4' 
 'O'  'O'   0.0106   0.0060 
 'International Tables Vol C Tables 4.2.6.8 and 6.1.1.4' 
 'F'  'F'   0.0171   0.0103 
 'International Tables Vol C Tables 4.2.6.8 and 6.1.1.4' 
 'Si'  'Si'   0.0817   0.0704 
 'International Tables Vol C Tables 4.2.6.8 and 6.1.1.4' 
 'Cu'  'Cu'   0.3201   1.2651 
 'International Tables Vol C Tables 4.2.6.8 and 6.1.1.4' 
  
_symmetry_cell_setting            Monoclinic 
_symmetry_space_group_name_H-M   'P 21/c'
  
loop_ 
 _symmetry_equiv_pos_as_xyz 
 'x, y, z' 
 '-x, y+1/2, -z+1/2' 
 '-x, -y, -z' 
 'x, -y-1/2, z-1/2' 
  
_cell_length_a                    17.955(4) 
_cell_length_b                    7.275(2) 
_cell_length_c                    19.454(4) 
_cell_angle_alpha                 90.00 
_cell_angle_beta                  98.758(4) 
_cell_angle_gamma                 90.00 
_cell_volume                      2512(2) 
_cell_formula_units_Z             4 
_cell_measurement_temperature     150(2) 
_cell_measurement_reflns_used     2422 
_cell_measurement_theta_min       2.9 
_cell_measurement_theta_max       27.5 
  
_exptl_crystal_description        PLATE 
_exptl_crystal_colour             'light red'
_exptl_crystal_size_max           0.19 
_exptl_crystal_size_mid           0.09 
_exptl_crystal_size_min           0.05 
_exptl_crystal_density_meas       ? 
_exptl_crystal_density_diffrn     1.767 
_exptl_crystal_density_method     'not measured' 
_exptl_crystal_F_000              1364 
_exptl_absorpt_coefficient_mu     1.019 
_exptl_absorpt_correction_type    'multi-scan' 
_exptl_absorpt_correction_T_min   0.668 
_exptl_absorpt_correction_T_max   1.000 
_exptl_absorpt_process_details   '(TWINABS; Bruker, 2003)'
  
_exptl_special_details 
; 
 ? 
; 
  
_diffrn_ambient_temperature       150(2) 
_diffrn_radiation_wavelength      0.71073 
_diffrn_radiation_type            MoK\a 
_diffrn_radiation_source          'normal-focus sealed tube' 
_diffrn_radiation_monochromator   graphite 
_diffrn_measurement_device_type   'Bruker SMART1000 CCD area detector' 
_diffrn_measurement_method       \w
_diffrn_detector_area_resol_mean  ? 
_diffrn_standards_number          0 
_diffrn_standards_interval_count  . 
_diffrn_standards_interval_time   ? 
_diffrn_standards_decay_%         0 
_diffrn_reflns_number             9658 
_diffrn_reflns_av_R_equivalents   0.067 
_diffrn_reflns_av_sigmaI/netI     0.113 
_diffrn_reflns_limit_h_min       -21 
_diffrn_reflns_limit_h_max        23 
_diffrn_reflns_limit_k_min       -9 
_diffrn_reflns_limit_k_max        9 
_diffrn_reflns_limit_l_min       -25 
_diffrn_reflns_limit_l_max        8 
_diffrn_reflns_theta_min          2.12 
_diffrn_reflns_theta_max          27.55 
_reflns_number_total              6257 
_reflns_number_gt                 4089 
_reflns_threshold_expression      >2\s(I) 
  
_computing_data_collection        'Bruker SMART version 5.624 (Bruker, 2001)' 
_computing_cell_refinement        'Bruker SAINT version 6.36A (Bruker, 2002)' 
_computing_data_reduction         'Bruker SAINT; SHELXTL (Sheldrick, 2008)' 
_computing_structure_solution     'SHELXS97 (Sheldrick, 2008)' 
_computing_structure_refinement   'SHELXL97 (Sheldrick, 2008)' 
_computing_molecular_graphics     ' ?' 
_computing_publication_material 'enCIFer(Allen et al.,2004);PLATON(Spek,2003)' 
  
  
_refine_ls_structure_factor_coef  Fsqd 
_refine_ls_matrix_type            full 
_refine_ls_weighting_scheme       calc 
_refine_ls_weighting_details 
 'calc w=1/[\s^2^(Fo^2^) + 43.78P] where P=(Fo^2^+2Fc^2^)/3' 
_atom_sites_solution_primary      direct 
_atom_sites_solution_secondary    difmap 
_atom_sites_solution_hydrogens    geom
_refine_ls_hydrogen_treatment     constr
_refine_ls_extinction_method      none 
_refine_ls_extinction_coef        ? 
_refine_ls_number_reflns          6257 
_refine_ls_number_parameters      371 
_refine_ls_number_restraints      0 
_refine_ls_R_factor_all           0.112 
_refine_ls_R_factor_gt            0.0711 
_refine_ls_wR_factor_ref          0.227 
_refine_ls_wR_factor_gt           0.214 
_refine_ls_goodness_of_fit_ref    1.19 
_refine_ls_restrained_S_all       1.19 
_refine_ls_shift/su_max           0.001 
_refine_ls_shift/su_mean          0.000 
  
loop_ 
 _atom_site_label 
 _atom_site_type_symbol 
 _atom_site_fract_x 
 _atom_site_fract_y 
 _atom_site_fract_z 
 _atom_site_U_iso_or_equiv 
 _atom_site_adp_type 
 _atom_site_occupancy 
 _atom_site_symmetry_multiplicity 
 _atom_site_calc_flag 
 _atom_site_refinement_flags 
 _atom_site_disorder_assembly 
 _atom_site_disorder_group 
Cu Cu 0.30089(7) -0.22751(16) -0.02995(7) 0.0160(3) Uani 1 1 d . . . 
O1W O 0.3374(4) -0.4117(10) -0.0900(4) 0.0202(17) Uani 1 1 d . . . 
O2W O 0.3455(4) -0.0344(10) -0.0810(3) 0.0174(16) Uani 1 1 d . . . 
O1 O 0.4065(4) -0.2901(11) 0.0377(4) 0.0232(18) Uani 1 1 d . . . 
O2 O 0.6331(4) -0.2195(9) 0.5203(4) 0.0217(15) Uani 1 1 d . . . 
O3 O 0.2358(4) -0.4193(10) 0.0028(4) 0.0224(18) Uani 1 1 d . . . 
O4 O 0.2718(4) -0.0425(10) 0.0349(4) 0.0212(18) Uani 1 1 d . . . 
N1 N 0.4350(5) -0.2718(12) 0.1042(4) 0.0181(19) Uani 1 1 d . . . 
N2 N 0.6023(5) -0.2276(12) 0.4537(4) 0.018(2) Uani 1 1 d . . . 
N3 N 0.1628(5) -0.3737(12) 0.0002(5) 0.018(2) Uani 1 1 d . . . 
N4 N 0.2064(5) 0.0474(11) 0.0252(5) 0.0167(19) Uani 1 1 d . . . 
C1 C 0.3924(6) -0.2303(15) 0.1533(5) 0.019(2) Uani 1 1 d . . . 
H1A H 0.3399 -0.2093 0.1404 0.023 Uiso 1 1 calc R . . 
C2 C 0.4244(6) -0.2180(15) 0.2220(5) 0.021(2) Uani 1 1 d . . . 
H2A H 0.3937 -0.1887 0.2561 0.025 Uiso 1 1 calc R . . 
C3 C 0.5018(5) -0.2483(15) 0.2423(5) 0.016(2) Uani 1 1 d . . . 
C4 C 0.5433(6) -0.2901(15) 0.1898(5) 0.020(2) Uani 1 1 d . . . 
H4A H 0.5961 -0.3100 0.2011 0.024 Uiso 1 1 calc R . . 
C5 C 0.5097(6) -0.3028(15) 0.1229(6) 0.022(3) Uani 1 1 d . . . 
H5A H 0.5393 -0.3343 0.0881 0.027 Uiso 1 1 calc R . . 
C6 C 0.6423(6) -0.1763(13) 0.4036(6) 0.018(2) Uani 1 1 d . . . 
H6A H 0.6924 -0.1330 0.4163 0.021 Uiso 1 1 calc R . . 
C7 C 0.6119(6) -0.1856(15) 0.3348(5) 0.018(2) Uani 1 1 d . . . 
H7A H 0.6416 -0.1542 0.3001 0.021 Uiso 1 1 calc R . . 
C8 C 0.5366(6) -0.2415(14) 0.3152(5) 0.016(2) Uani 1 1 d . . . 
C9 C 0.4970(6) -0.2912(15) 0.3679(6) 0.022(3) Uani 1 1 d . . . 
H9A H 0.4461 -0.3300 0.3567 0.026 Uiso 1 1 calc R . . 
C10 C 0.5301(6) -0.2854(16) 0.4364(6) 0.022(2) Uani 1 1 d . . . 
H10A H 0.5022 -0.3221 0.4718 0.026 Uiso 1 1 calc R . . 
C11 C 0.1185(6) -0.3704(15) -0.0624(6) 0.024(3) Uani 1 1 d . . . 
H11A H 0.1390 -0.4030 -0.1030 0.029 Uiso 1 1 calc R . . 
C12 C 0.0436(6) -0.3200(14) -0.0682(6) 0.023(2) Uani 1 1 d . . . 
H12A H 0.0128 -0.3162 -0.1125 0.027 Uiso 1 1 calc R . . 
C13 C 0.0139(6) -0.2750(14) -0.0086(5) 0.015(2) Uani 1 1 d . . . 
C14 C 0.0606(6) -0.2892(14) 0.0544(5) 0.017(2) Uani 1 1 d . . . 
H14A H 0.0404 -0.2641 0.0958 0.021 Uiso 1 1 calc R . . 
C15 C 0.1364(6) -0.3390(15) 0.0599(6) 0.019(2) Uani 1 1 d . . . 
H15A H 0.1677 -0.3479 0.1037 0.023 Uiso 1 1 calc R . . 
C16 C 0.1646(6) 0.0677(14) -0.0389(6) 0.021(2) Uani 1 1 d . . . 
H16A H 0.1835 0.0274 -0.0794 0.025 Uiso 1 1 calc R . . 
C17 C 0.0958(6) 0.1459(15) -0.0438(5) 0.020(2) Uani 1 1 d . . . 
H17A H 0.0668 0.1583 -0.0886 0.025 Uiso 1 1 calc R . . 
C18 C 0.0654(5) 0.2091(14) 0.0132(5) 0.014(2) Uani 1 1 d . . . 
C19 C 0.1131(6) 0.2002(14) 0.0776(6) 0.020(2) Uani 1 1 d . . . 
H19A H 0.0973 0.2513 0.1179 0.024 Uiso 1 1 calc R . . 
C20 C 0.1825(6) 0.1177(15) 0.0823(6) 0.022(3) Uani 1 1 d . . . 
H20A H 0.2140 0.1101 0.1261 0.026 Uiso 1 1 calc R . . 
Si Si 0.20639(18) -0.4629(4) 0.25517(16) 0.0185(7) Uani 1 1 d . . . 
F1 F 0.1131(4) -0.4556(10) 0.2248(3) 0.0338(18) Uani 1 1 d . . . 
F2 F 0.1940(4) -0.3365(9) 0.3253(3) 0.0301(17) Uani 1 1 d . . . 
F3 F 0.2202(3) -0.2682(9) 0.2109(3) 0.0298(15) Uani 1 1 d . . . 
F4 F 0.1945(4) -0.6542(9) 0.3012(3) 0.0312(17) Uani 1 1 d . . . 
F5 F 0.2213(4) -0.5879(9) 0.1868(3) 0.0281(16) Uani 1 1 d . . . 
F6 F 0.3015(4) -0.4691(9) 0.2860(3) 0.0278(15) Uani 1 1 d . . . 
C1S C 1.0603(7) 0.496(2) 0.7423(7) 0.044(4) Uani 1 1 d . . . 
O1S O 0.9947(5) 0.4886(13) 0.6896(4) 0.040(2) Uani 1 1 d . . . 
O2S O 0.2742(4) -0.5318(11) -0.2155(4) 0.0253(19) Uani 1 1 d . . . 
  
loop_ 
 _atom_site_aniso_label 
 _atom_site_aniso_U_11 
 _atom_site_aniso_U_22 
 _atom_site_aniso_U_33 
 _atom_site_aniso_U_23 
 _atom_site_aniso_U_13 
 _atom_site_aniso_U_12 
Cu 0.0126(5) 0.0168(6) 0.0183(6) -0.0008(6) 0.0013(6) 0.0017(6) 
O1W 0.018(4) 0.019(4) 0.023(4) 0.000(3) 0.001(3) 0.000(3) 
O2W 0.019(4) 0.022(4) 0.011(4) 0.000(3) 0.001(3) 0.001(3) 
O1 0.018(4) 0.036(5) 0.014(4) 0.002(4) -0.004(3) 0.006(4) 
O2 0.031(4) 0.016(4) 0.017(3) -0.003(4) 0.001(4) -0.002(3) 
O3 0.012(4) 0.022(4) 0.033(5) 0.008(4) 0.002(4) 0.002(3) 
O4 0.016(4) 0.024(4) 0.023(4) -0.002(4) 0.001(3) 0.004(3) 
N1 0.015(4) 0.019(5) 0.019(4) 0.001(4) -0.004(4) 0.001(4) 
N2 0.024(5) 0.015(5) 0.016(4) -0.005(4) 0.003(4) -0.004(4) 
N3 0.009(4) 0.014(5) 0.032(6) 0.000(4) 0.005(4) -0.002(4) 
N4 0.015(5) 0.019(5) 0.016(4) 0.003(4) 0.002(4) 0.006(4) 
C1 0.012(5) 0.018(6) 0.029(6) 0.002(5) 0.007(5) 0.004(5) 
C2 0.024(5) 0.021(6) 0.017(6) -0.006(5) 0.000(5) 0.006(5) 
C3 0.017(4) 0.014(5) 0.016(5) 0.000(4) 0.003(5) -0.003(5) 
C4 0.016(6) 0.022(6) 0.022(6) 0.002(5) 0.003(5) 0.002(5) 
C5 0.019(6) 0.023(6) 0.027(6) 0.011(5) 0.010(5) 0.011(5) 
C6 0.013(5) 0.012(5) 0.028(6) -0.009(5) 0.002(5) -0.006(4) 
C7 0.011(5) 0.024(6) 0.017(5) -0.003(5) 0.001(5) 0.001(4) 
C8 0.018(5) 0.012(6) 0.017(5) 0.001(5) 0.001(5) 0.004(5) 
C9 0.015(5) 0.022(6) 0.030(6) -0.003(5) 0.008(5) -0.009(5) 
C10 0.021(6) 0.026(6) 0.020(5) -0.001(5) 0.008(5) -0.002(5) 
C11 0.023(6) 0.024(6) 0.026(6) 0.000(5) 0.003(6) 0.000(5) 
C12 0.022(6) 0.024(6) 0.022(6) 0.009(5) 0.003(6) 0.002(5) 
C13 0.019(5) 0.004(5) 0.023(6) 0.005(5) 0.008(5) 0.002(4) 
C14 0.019(5) 0.018(5) 0.016(5) -0.002(5) 0.004(5) -0.002(5) 
C15 0.015(6) 0.029(6) 0.014(5) 0.004(5) 0.003(5) 0.000(5) 
C16 0.024(6) 0.021(6) 0.017(6) 0.003(5) 0.004(5) 0.000(5) 
C17 0.021(6) 0.027(6) 0.015(6) -0.002(5) 0.007(5) 0.003(5) 
C18 0.015(5) 0.009(5) 0.017(5) 0.000(4) -0.003(4) -0.002(4) 
C19 0.018(5) 0.021(6) 0.021(6) -0.003(5) 0.007(5) 0.000(5) 
C20 0.021(6) 0.028(6) 0.016(6) -0.003(5) 0.003(5) 0.000(5) 
Si 0.0192(16) 0.0181(16) 0.0184(15) -0.0011(13) 0.0035(14) 0.0012(13) 
F1 0.017(3) 0.046(5) 0.036(4) 0.002(4) -0.003(3) 0.002(3) 
F2 0.040(4) 0.030(4) 0.023(3) 0.001(3) 0.012(3) 0.008(3) 
F3 0.039(4) 0.026(4) 0.024(3) 0.003(3) 0.006(4) -0.006(3) 
F4 0.034(4) 0.023(4) 0.038(4) 0.006(3) 0.011(4) 0.000(3) 
F5 0.025(4) 0.032(4) 0.027(4) -0.014(3) 0.003(3) 0.005(3) 
F6 0.020(3) 0.043(4) 0.019(3) -0.001(3) -0.001(3) 0.001(3) 
C1S 0.021(7) 0.058(10) 0.047(9) -0.013(8) -0.015(6) -0.007(7) 
O1S 0.029(5) 0.064(7) 0.023(4) -0.002(5) -0.009(4) -0.002(5) 
O2S 0.021(4) 0.030(5) 0.024(4) -0.002(4) 0.002(4) -0.003(4) 
  
_geom_special_details 
; 
 All esds (except the esd in the dihedral angle between two l.s. planes) 
 are estimated using the full covariance matrix.  The cell esds are taken 
 into account individually in the estimation of esds in distances, angles 
 and torsion angles; correlations between esds in cell parameters are only 
 used when they are defined by crystal symmetry.  An approximate (isotropic) 
 treatment of cell esds is used for estimating esds involving l.s. planes. 
; 
  
loop_ 
 _geom_bond_atom_site_label_1 
 _geom_bond_atom_site_label_2 
 _geom_bond_distance 
 _geom_bond_site_symmetry_2 
 _geom_bond_publ_flag 
Cu O1W 1.955(7) . ? 
Cu O2W 1.961(7) . ? 
Cu O1 2.185(7) . ? 
Cu O3 1.987(7) . ? 
Cu O4 1.969(7) . ? 
O1 N1 1.324(10) . ? 
O2 N2 1.331(11) . ? 
O3 N3 1.344(10) . ? 
O4 N4 1.332(11) . ? 
N1 C1 1.346(12) . ? 
N1 C5 1.354(13) . ? 
N2 C6 1.347(13) . ? 
N2 C10 1.356(13) . ? 
N3 C15 1.344(13) . ? 
N3 C11 1.350(14) . ? 
N4 C20 1.350(13) . ? 
N4 C16 1.362(13) . ? 
C1 C2 1.374(14) . ? 
C2 C3 1.403(13) . ? 
C3 C4 1.386(14) . ? 
C3 C8 1.462(14) . ? 
C4 C5 1.353(15) . ? 
C6 C7 1.369(14) . ? 
C7 C8 1.407(14) . ? 
C8 C9 1.381(14) . ? 
C9 C10 1.373(15) . ? 
C11 C12 1.382(14) . ? 
C12 C13 1.389(14) . ? 
C13 C14 1.379(14) . ? 
C13 C18 1.492(13) 3 ? 
C14 C15 1.397(14) . ? 
C16 C17 1.349(14) . ? 
C17 C18 1.387(14) . ? 
C18 C19 1.407(14) . ? 
C18 C13 1.492(13) 3 ? 
C19 C20 1.373(14) . ? 
Si F1 1.690(7) . ? 
Si F2 1.688(7) . ? 
Si F3 1.695(7) . ? 
Si F4 1.686(7) . ? 
Si F5 1.665(7) . ? 
Si F6 1.723(7) . ? 
C1S O1S 1.440(15) . ? 
  
loop_ 
 _geom_angle_atom_site_label_1 
 _geom_angle_atom_site_label_2 
 _geom_angle_atom_site_label_3 
 _geom_angle 
 _geom_angle_site_symmetry_1 
 _geom_angle_site_symmetry_3 
 _geom_angle_publ_flag 
O1W Cu O2W 89.3(3) . . ? 
O1W Cu O4 175.6(3) . . ? 
O2W Cu O4 90.2(3) . . ? 
O1W Cu O3 88.7(3) . . ? 
O2W Cu O3 166.3(3) . . ? 
O4 Cu O3 92.7(3) . . ? 
O1W Cu O1 83.0(3) . . ? 
O2W Cu O1 94.1(3) . . ? 
O4 Cu O1 92.7(3) . . ? 
O3 Cu O1 99.2(3) . . ? 
N1 O1 Cu 137.6(6) . . ? 
N3 O3 Cu 115.6(6) . . ? 
N4 O4 Cu 124.0(6) . . ? 
O1 N1 C1 122.6(8) . . ? 
O1 N1 C5 117.8(9) . . ? 
C1 N1 C5 119.6(9) . . ? 
O2 N2 C6 120.2(8) . . ? 
O2 N2 C10 119.7(8) . . ? 
C6 N2 C10 120.0(9) . . ? 
C15 N3 O3 118.9(9) . . ? 
C15 N3 C11 122.6(9) . . ? 
O3 N3 C11 118.4(9) . . ? 
O4 N4 C20 117.0(9) . . ? 
O4 N4 C16 122.3(9) . . ? 
C20 N4 C16 120.7(9) . . ? 
N1 C1 C2 120.4(9) . . ? 
C1 C2 C3 120.9(10) . . ? 
C4 C3 C2 116.6(9) . . ? 
C4 C3 C8 121.6(8) . . ? 
C2 C3 C8 121.8(9) . . ? 
C5 C4 C3 120.9(10) . . ? 
C4 C5 N1 121.7(10) . . ? 
N2 C6 C7 121.1(9) . . ? 
C6 C7 C8 120.1(9) . . ? 
C9 C8 C7 117.1(9) . . ? 
C9 C8 C3 121.3(10) . . ? 
C7 C8 C3 121.5(9) . . ? 
C10 C9 C8 121.1(10) . . ? 
N2 C10 C9 120.5(9) . . ? 
N3 C11 C12 120.7(11) . . ? 
C11 C12 C13 119.2(11) . . ? 
C14 C13 C12 117.8(9) . . ? 
C14 C13 C18 121.6(9) . 3 ? 
C12 C13 C18 120.6(9) . 3 ? 
C13 C14 C15 122.7(9) . . ? 
N3 C15 C14 116.9(10) . . ? 
C17 C16 N4 118.8(10) . . ? 
C16 C17 C18 123.4(10) . . ? 
C17 C18 C19 115.9(9) . . ? 
C17 C18 C13 123.1(9) . 3 ? 
C19 C18 C13 121.0(9) . 3 ? 
C20 C19 C18 120.1(10) . . ? 
N4 C20 C19 120.7(10) . . ? 
F5 Si F4 91.3(3) . . ? 
F5 Si F2 178.3(4) . . ? 
F4 Si F2 88.7(3) . . ? 
F5 Si F1 90.5(4) . . ? 
F4 Si F1 90.7(4) . . ? 
F2 Si F1 91.2(4) . . ? 
F5 Si F3 89.8(4) . . ? 
F4 Si F3 178.3(4) . . ? 
F2 Si F3 90.2(3) . . ? 
F1 Si F3 90.5(4) . . ? 
F5 Si F6 89.6(3) . . ? 
F4 Si F6 89.6(4) . . ? 
F2 Si F6 88.7(4) . . ? 
F1 Si F6 179.7(4) . . ? 
F3 Si F6 89.2(3) . . ? 
  
_diffrn_measured_fraction_theta_max    0.869 
_diffrn_reflns_theta_full              27.50 
_diffrn_measured_fraction_theta_full   0.871 

_refine_diff_density_max    0.77 
_refine_diff_density_min   -0.70 
_refine_diff_density_rms    0.15

# END of CIF
